# Supplementary material
Source: PubMed Central journal article supplement (PMC2947222)
Supplement: JCI42028sd.pdf [file JCI42028sd.pdf]

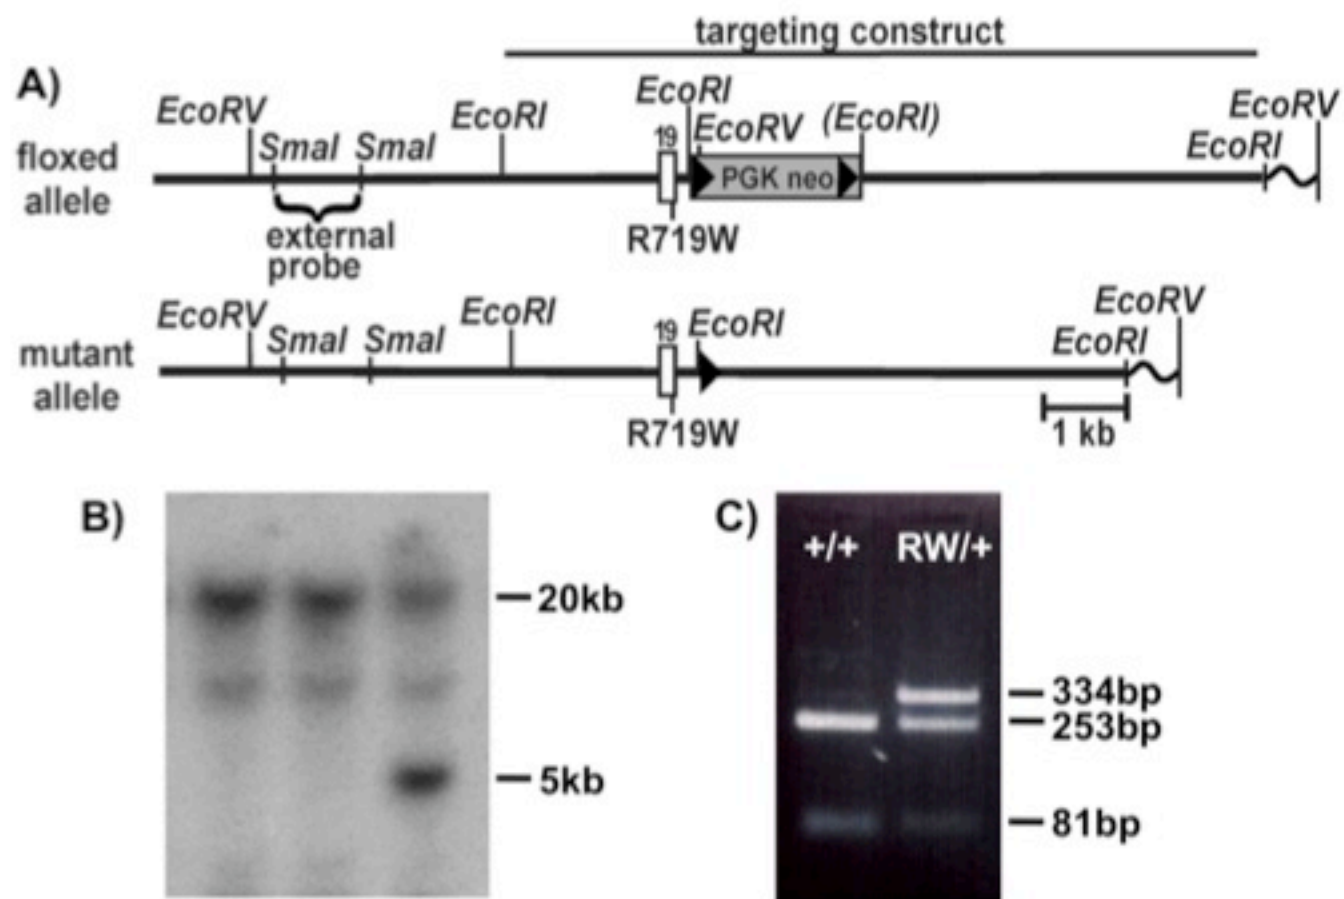

Supplemental Figure 1

**Supplementary Figure 1 Legend.** Construction of  $\alpha\text{MHC}^{\text{R719W}}$  mice. A) The human HCM mutation Arg719Trp (RW) mutation was engineered using a targeting construct containing an EcoR1 fragment derived from the murine  $\alpha$  cardiac MHC gene. B) Southern blot of EcoRV-digested DNA from targeted embryonic stem cells, probed with the external Smal/Smal fragment contains the engineered 5 kb fragment. C) PCR fragments demonstrating the presence of the R719W missense mutation in the targeted allele.

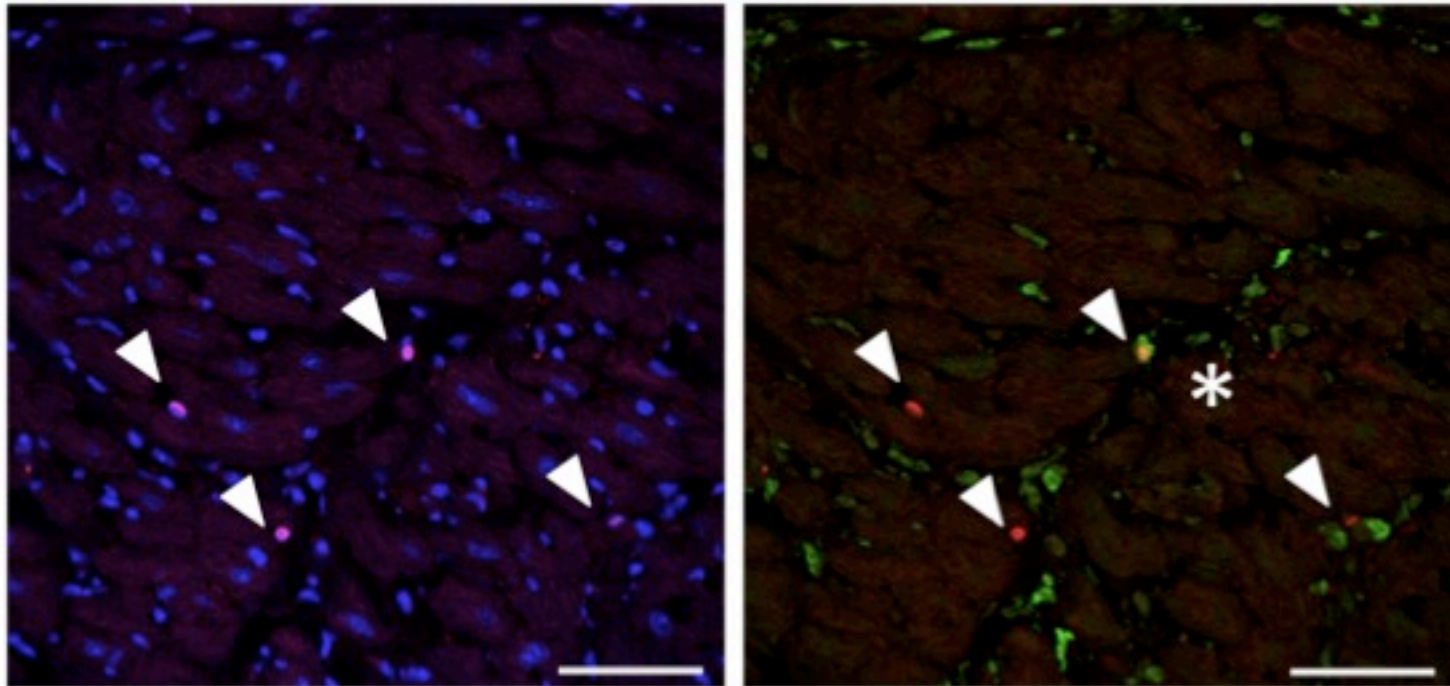

## Supplemental Figure 2

**Supplemental Figure 2 Legend.** Non-myocyte proliferation and Fsp1 expression in heart sections from hypertrophic  $\alpha\text{MHC}^{719/+}$  csa mice. Left panel: confocal immunofluorescence of sections show DAPI-stained nuclei (blue) and proliferating cells identified with anti-Ki67 antigen antibody (magenta, arrowheads). Right panel: Cells expressing fibroblast specific protein-1 (Fsp1), identified with anti-S100A4 (Fsp1) antibody (green), and Ki67 (red, arrowhead) were identified. Ki67-Fsp1 double positive cells (\*) appear yellow. Bar: 47.62  $\mu\text{m}$ .

# Hyp-MHC<sup>719/+</sup> csa

---

## Non-fibrosis

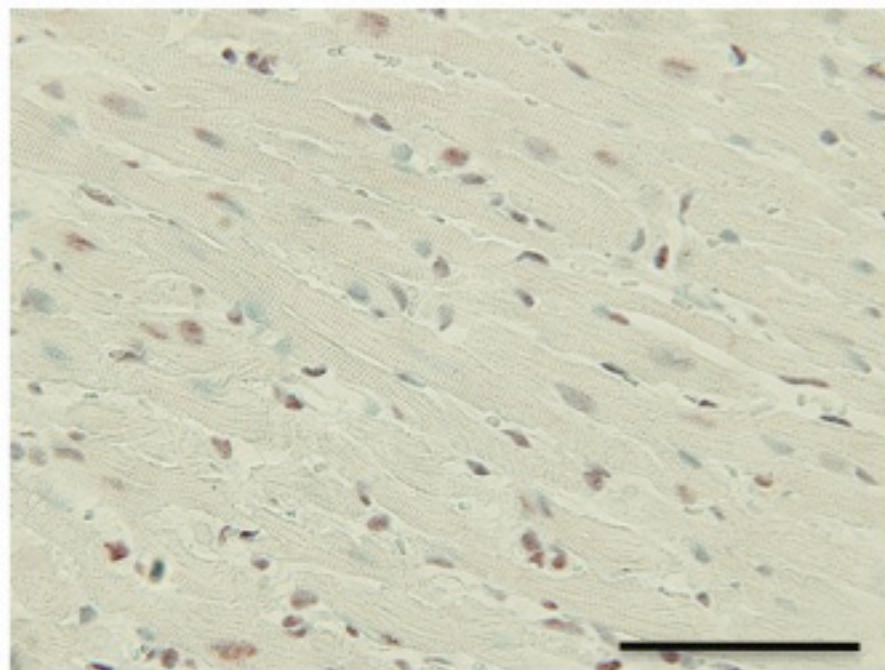

## Fibrosis

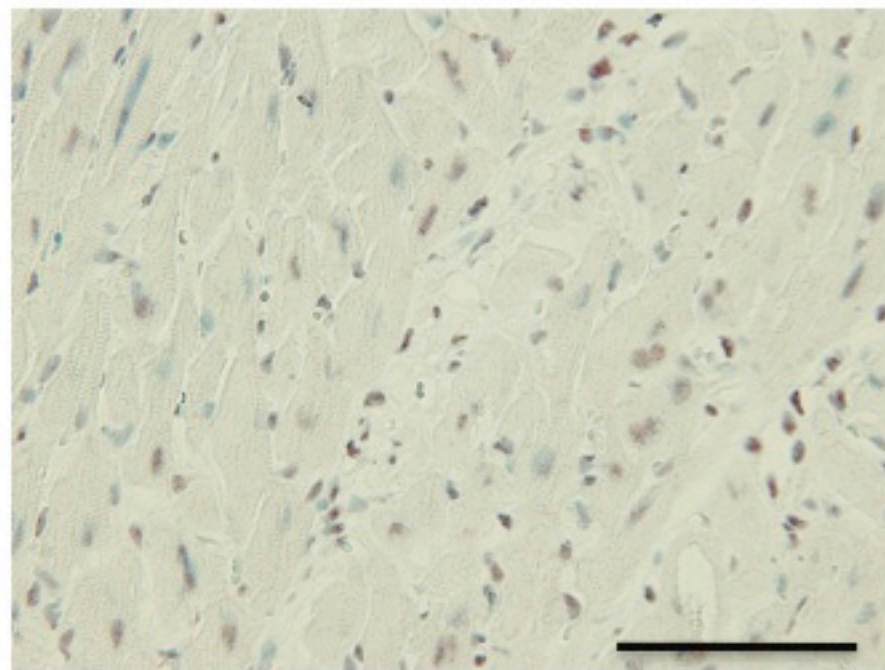

## Supplemental Figure 3

**Supplemental Figure 3 Legend.** pSmad2 immunohistochemical staining of LV sections from hypertrophic (Hyp)  $\alpha$ MHC<sup>719/+</sup> csa mice in regions with normal myocardial architecture (non-fibrosis) and fibrosis. pSmad2 positive nuclei appear rust-colored in comparison to hematoxylin-stained blue nuclei. Bar: 50  $\mu$ m.

## Supplemental Table 1.

Non-myocytes were isolated from hearts of untreated (No CsA) and cyclosporine (CsA)-treated wildtype (WT) and  $\alpha$ MHC<sup>403/+</sup> (403) mice. GeneID is the RefGene identification. RNA levels were assessed by DSAGE and tag counts per gene are expressed as tag counts per million total counts. P-values reflect the comparison of WT versus  $\alpha$ MHC<sup>403/+</sup> non-myocyte RNA tag counts. Fold change indicates the ratio of  $\alpha$ MHC<sup>403/+</sup> to WT non-myocyte RNA expression. Cell cycle-control genes are indicated in **bold**. Chr, chromosome number. Position, chromosomal position; Geneclass\_ingen, gene class as determined by Ingenuity Pathway Analysis software.

| GeneID        | Title                                                              | Non-myocytes |            |                |             |           |            |                |             | Myocytes |           | chr              | position                | geneClass | ingen |
|---------------|--------------------------------------------------------------------|--------------|------------|----------------|-------------|-----------|------------|----------------|-------------|----------|-----------|------------------|-------------------------|-----------|-------|
|               |                                                                    | No CsA       |            |                |             | CsA       |            |                |             | No CsA   |           |                  |                         |           |       |
|               |                                                                    | WT           | 403        | p-value        | Fold Change | WT        | 403        | p-Value        | Fold Change | WT       |           |                  |                         |           |       |
| Cthrc1        | Collagen triple helix repeat containing 1                          | 1            | 6          | 6.5E-05        | 9.4         | 1         | 78         | 2.7E-74        | 141.2       | 0        | 15        | 38915894         | other                   |           |       |
| Col11a1       | Collagen, type XI, alpha 1                                         | 0            | 1          | 5.4E-02        | 10.0        | 0         | 38         | 3.9E-37        | 139.2       | 0        | 3         | 113922193        | other                   |           |       |
| BC052328      | CDNA sequence BC052328                                             | 8            | 9          | 4.7E-01        | 1.2         | 0         | 13         | 1.5E-12        | 47.8        | 0        | 15        | 27586352         | other                   |           |       |
| Thoc4         | THO complex 4                                                      | 8            | 9          | 7.8E-01        | 1.1         | 0         | 12         | 4.3E-11        | 42.3        | 2        | 11        | 120456450        | transcription regulator |           |       |
| Adam8         | A disintegrin and metallopeptidase domain 8                        | 7            | 13         | 2.2E-02        | 1.8         | 2         | 49         | 1.8E-38        | 22.0        | 0        | 7         | 147165206        | peptidase               |           |       |
| <b>Spp1</b>   | <b>Secreted phosphoprotein 1</b>                                   | <b>43</b>    | <b>105</b> | <b>3.0E-20</b> | <b>2.4</b>  | <b>39</b> | <b>828</b> | <b>0.0E+00</b> | <b>21.1</b> | <b>0</b> | <b>5</b>  | <b>104869803</b> | <b>cytokine</b>         |           |       |
| Col16a1       | Collagen, type XVI, alpha 1                                        | 7            | 13         | 1.2E-02        | 1.9         | 2         | 45         | 9.6E-34        | 17.9        | 0        | 4         | 129776499        | other                   |           |       |
| Postn         | Periostin, osteoblast specific factor                              | 108          | 391        | 3.8E-123       | 3.6         | 147       | 2498       | 0.0E+00        | 17.0        | 4        | 3         | 54194697         | other                   |           |       |
| Ein           | Elastin                                                            | 14           | 48         | 2.5E-15        | 3.4         | 15        | 230        | 7.1E-162       | 15.4        | 3        | 5         | 135178776        | other                   |           |       |
| B4galt1       | Beta-1,4-N-acetyl-galactosaminyl transferase 1                     | 1            | 6          | 1.2E-03        | 4.7         | 1         | 17         | 3.5E-13        | 15.4        | 0        | 10        | 126609272        | enzyme                  |           |       |
| Ahsg          | Alpha-2-HS-glycoprotein                                            | 7            | 11         | 8.6E-02        | 1.6         | 2         | 34         | 9.6E-25        | 15.2        | 0        | 16        | 22899112         | other                   |           |       |
| 0610007N19Rik | RIKEN cDNA 0610007N19 gene                                         | 5            | 5          | 9.4E-01        | 0.9         | 1         | 12         | 6.2E-10        | 15.0        | 0        | 15        | 32170406         |                         |           |       |
| Mfap2         | Microfibrillar-associated protein 2                                | 9            | 14         | 1.1E-01        | 1.5         | 5         | 71         | 1.9E-49        | 14.2        | 1        | 4         | 140571842        | other                   |           |       |
| Crif1         | Cytokine receptor-like factor 1                                    | 8            | 29         | 2.8E-11        | 3.8         | 7         | 97         | 3.7E-67        | 14.0        | 0        | 8         | 73027874         | other                   |           |       |
| Dusp4         | Dual specificity phosphatase 4                                     | 36           | 26         | 4.6E-02        | 0.7         | 15        | 213        | 1.3E-145       | 14.0        | 1        | 8         | 35884941         | phosphatase             |           |       |
| 5730596K20Rik | RIKEN cDNA 5730596K20 gene                                         | 7            | 4          | 1.2E-01        | 0.5         | 1         | 7          | 5.5E-06        | 13.0        | 1        | 19        | 7609674          |                         |           |       |
| Fxyd6         | FXYP domain-containing ion transport regulator 6                   | 7            | 13         | 1.3E-02        | 1.9         | 3         | 36         | 2.1E-24        | 11.8        | 1        | 9         | 45198075         | ion channel             |           |       |
| Top2a         | Topoisomerase (DNA) II alpha                                       | 3            | 3          | 1.0E+00        | 0.9         | 1         | 9          | 2.9E-07        | 11.4        | 0        | 11        | 98854635         | enzyme                  |           |       |
| Birc5         | Baculoviral IAP repeat-containing 5                                | 5            | 2          | 6.2E-02        | 0.4         | 1         | 9          | 6.2E-07        | 10.9        | 0        | 11        | 117716950        | other                   |           |       |
| Serpina3a     | Serine (or cysteine) peptidase inhibitor, clade A, member 3        | 5            | 6          | 6.0E-01        | 1.2         | 2         | 17         | 5.1E-12        | 10.5        | 0        | 12        | 105647132        |                         |           |       |
| Tnfrsf11b     | Tumor necrosis factor receptor superfamily, member 11b             | 5            | 10         | 2.4E-02        | 1.9         | 7         | 69         | 1.2E-43        | 10.4        | 0        | 15        | 54082553         | transmembrane receptor  |           |       |
| Tnc           | Tenascin C                                                         | 22           | 92         | 2.7E-34        | 4.1         | 89        | 915        | 0.0E+00        | 10.2        | 0        | 4         | 63621147         | other                   |           |       |
| Skp2          | S-phase kinase-associated protein 2 (p45)                          | 1            | 2          | 1.6E-01        | 2.3         | 1         | 6          | 1.2E-04        | 10.2        | 0        | 15        | 9041821          | other                   |           |       |
| 6330503K22Rik | RIKEN cDNA 6330503K22 gene                                         | 6            | 7          | 4.3E-01        | 1.3         | 0         | 13         | 1.7E-13        | 10.0        | 2        | 7         | 125880312        |                         |           |       |
| 9430028L06Rik | RIKEN cDNA 9430028L06 gene                                         | 0            | 2          | 5.7E-02        | 4.7         | 0         | 11         | 1.2E-11        | 10.0        | 0        | 18        | 63170019         |                         |           |       |
| Zbtb46        | Zinc finger and BTB domain containing 46                           | 5            | 5          | 9.4E-01        | 1.0         | 0         | 7          | 1.6E-07        | 10.0        | 1        | 2         | 181145334        | other                   |           |       |
| Sdc1          | Syndecan 1                                                         | 12           | 18         | 2.8E-02        | 1.6         | 13        | 127        | 4.1E-76        | 9.6         | 1        | 12        | 8799478          | other                   |           |       |
| <b>Vsig4</b>  | <b>V-set and immunoglobulin domain containing 4</b>                | <b>4</b>     | <b>13</b>  | <b>1.3E-05</b> | <b>3.6</b>  | <b>1</b>  | <b>13</b>  | <b>3.7E-09</b> | <b>9.6</b>  | <b>0</b> | <b>21</b> | <b>93442541</b>  | <b>other</b>            |           |       |
| Timp1         | Tissue inhibitor of metalloproteinase 1                            | 123          | 175        | 1.2E-07        | 1.4         | 185       | 1587       | 0.0E+00        | 8.6         | 0        | 20        | 20450238         | other                   |           |       |
| Col1a2        | Collagen, type I, alpha 2                                          | 195          | 214        | 1.1E-01        | 1.1         | 102       | 865        | 0.0E+00        | 8.5         | 4        | 6         | 4489519          | other                   |           |       |
| F10           | Coagulation factor X                                               | 3            | 7          | 3.3E-02        | 2.2         | 2         | 21         | 6.0E-13        | 8.3         | 0        | 8         | 13055822         | peptidase               |           |       |
| Col3a1        | Collagen, type III, alpha 1                                        | 209          | 447        | 2.1E-62        | 2.1         | 336       | 2755       | 0.0E+00        | 8.2         | 8        | 1         | 45405633         | other                   |           |       |
| Glipr2        | GLI pathogenesis-related 2                                         | 4            | 4          | 7.8E-01        | 0.9         | 2         | 18         | 4.6E-11        | 8.0         | 0        | 4         | 43991184         | other                   |           |       |
| Ldlrad3       | Low density lipoprotein receptor class A domain containing 3       | 7            | 5          | 2.9E-01        | 0.7         | 1         | 11         | 5.9E-07        | 7.6         | 1        | 2         | 101790773        | other                   |           |       |
| Col1a1        | Collagen, type I, alpha 1                                          | 285          | 449        | 1.1E-26        | 1.6         | 274       | 2048       | 0.0E+00        | 7.5         | 7        | 11        | 94813053         | other                   |           |       |
| Sipi          | Secretory leukocyte peptidase inhibitor                            | 3            | 7          | 1.5E-02        | 2.5         | 5         | 37         | 7.7E-21        | 7.4         | 0        | 2         | 164179954        |                         |           |       |
| Ltbp2         | Latent transforming growth factor beta binding protein 2           | 8            | 24         | 1.3E-07        | 3.1         | 9         | 66         | 8.1E-36        | 7.4         | 1        | 12        | 86124185         | other                   |           |       |
| Fkh18         | Forkhead-like 18 (Drosophila)                                      | 4            | 7          | 7.0E-02        | 1.9         | 9         | 68         | 9.4E-37        | 7.4         | 0        | 2         | 152758337        | transcription regulator |           |       |
| Gdf6          | Growth differentiation factor 6                                    | 6            | 5          | 4.9E-01        | 0.8         | 1         | 10         | 1.2E-06        | 7.4         | 0        | 4         | 9789168          | growth factor           |           |       |
| Arg2          | Arginase type II                                                   | 12           | 12         | 9.2E-01        | 1.0         | 5         | 37         | 1.5E-20        | 7.4         | 0        | 12        | 80257237         | enzyme                  |           |       |
| Nnmt          | Nicotinamide N-methyltransferase                                   | 8            | 5          | 1.9E-01        | 0.6         | 1         | 10         | 2.4E-06        | 7.1         | 0        | 9         | 48400215         | enzyme                  |           |       |
| Ttc9          | Tetratricopeptide repeat domain 9                                  | 5            | 14         | 8.1E-05        | 2.9         | 6         | 41         | 1.8E-22        | 7.1         | 0        | 12        | 82765870         | other                   |           |       |
| Trim59        | Tripartite motif-containing 59                                     | 5            | 13         | 1.0E-03        | 2.4         | 2         | 15         | 3.1E-09        | 7.0         | 0        | 3         | 68839615         | other                   |           |       |
| Sec61b        | Sec61 beta subunit                                                 | 10           | 9          | 6.6E-01        | 0.9         | 2         | 17         | 3.4E-10        | 7.0         | 1        | 4         | 47496105         | transporter             |           |       |
| C1qtnf5       | C1q and tumor necrosis factor related protein 5                    | 6            | 4          | 3.5E-01        | 0.7         | 2         | 13         | 5.6E-08        | 6.8         | 0        | 9         | 43916427         | transmembrane receptor  |           |       |
| Calml4        | Calmodulin-like 4                                                  | 5            | 6          | 5.1E-01        | 1.2         | 1         | 9          | 9.6E-06        | 6.6         | 0        | 9         | 62723510         | other                   |           |       |
| E430002G05Rik | RIKEN cDNA E430002G05 gene                                         | 12           | 18         | 4.0E-02        | 1.5         | 11        | 69         | 5.5E-35        | 6.4         | 0        | 2         | 102482924        |                         |           |       |
| Gad1          | Glutamate decarboxylase-like 1                                     | 13           | 7          | 4.0E-02        | 0.6         | 4         | 25         | 1.8E-13        | 6.4         | 3        | 15        | 59503642         | enzyme                  |           |       |
| Hey1          | Hairy/enhancer-of-split related with YRPW motif 1                  | 7            | 13         | 1.2E-02        | 1.9         | 2         | 11         | 2.0E-06        | 6.4         | 3        | 3         | 8663555          | transcription regulator |           |       |
| Adcy2         | Adenylate cyclase 2                                                | 3            | 5          | 3.1E-01        | 1.5         | 1         | 5          | 8.9E-04        | 6.4         | 0        | 13        | 68759165         | enzyme                  |           |       |
| Fkbp10        | FK506 binding protein 10                                           | 8            | 15         | 1.4E-02        | 1.8         | 7         | 45         | 4.7E-23        | 6.3         | 1        | 11        | 100285836        | enzyme                  |           |       |
| Cdc20         | Cell division cycle 20 homolog (S. cerevisiae)                     | 4            | 4          | 1.0E+00        | 1.0         | 2         | 12         | 4.3E-07        | 6.2         | 0        | 16        | 91513599         | other                   |           |       |
| Rgs19         | Regulator of G-protein signaling 19                                | 8            | 12         | 1.3E-01        | 1.5         | 4         | 28         | 1.7E-14        | 6.2         | 2        | 2         | 181423453        | other                   |           |       |
| Lg4           | Leucine-rich repeat LG1 family, member 4                           | 4            | 6          | 2.7E-01        | 1.5         | 1         | 7          | 1.8E-04        | 6.1         | 0        | 7         | 31855554         | other                   |           |       |
| Chi3l1        | Chitinase 3-like 1                                                 | 3            | 14         | 1.6E-07        | 5.0         | 5         | 32         | 1.8E-16        | 6.1         | 0        | 1         | 136086093        | enzyme                  |           |       |
| Pivap         | Plasmalemma vesicle associated protein                             | 11           | 27         | 6.6E-06        | 2.3         | 6         | 38         | 2.3E-19        | 6.1         | 1        | 8         | 74022047         | other                   |           |       |
| Ptpn6         | Protein tyrosine phosphatase, non-receptor type 6                  | 3            | 11         | 2.6E-04        | 3.2         | 1         | 8          | 3.7E-05        | 6.0         | 0        | 6         | 124670735        | phosphatase             |           |       |
| Aldh1a3       | Aldehyde dehydrogenase family 1, subfamily A3                      | 3            | 4          | 2.4E-01        | 1.6         | 8         | 46         | 2.4E-22        | 5.9         | 0        | 7         | 73536343         | enzyme                  |           |       |
| Trim47        | Tripartite motif protein 47                                        | 18           | 27         | 1.5E-02        | 1.5         | 9         | 49         | 9.7E-24        | 5.8         | 3        | 11        | 115967560        | other                   |           |       |
| Gpx7          | Glutathione peroxidase 7                                           | 12           | 19         | 2.0E-02        | 1.6         | 12        | 66         | 6.4E-31        | 5.7         | 3        | 4         | 108073169        | enzyme                  |           |       |
| Mast4         | Microtubule associated serine/threonine kinase family 4            | 8            | 7          | 5.7E-01        | 0.8         | 2         | 9          | 1.5E-05        | 5.7         | 1        | 13        | 103523852        | kinase                  |           |       |
| Cxcl13        | Chemokine (C-X-C motif) ligand 13                                  | 3            | 3          | 7.6E-01        | 1.1         | 2         | 11         | 3.2E-06        | 5.7         | 0        | 5         | 96389779         |                         |           |       |
| Mgp           | Matrix Gla protein                                                 | 1031         | 1019       | 6.5E-01        | 1.0         | 1017      | 5693       | 0.0E+00        | 5.6         | 34       | 6         | 136821064        | other                   |           |       |
| Saa3          | Serum amyloid A 3                                                  | 21           | 38         | 5.2E-05        | 1.8         | 43        | 235        | 2.2E-103       | 5.5         | 0        | 7         | 53967467         | other                   |           |       |
| Fuca1         | Fucosidase, alpha-L-1, tissue                                      | 15           | 22         | 5.2E-02        | 1.4         | 7         | 38         | 7.6E-18        | 5.5         | 5        | 4         | 135488972        | enzyme                  |           |       |
| Gfra2         | Glial cell line derived neurotrophic factor family receptor type 2 | 7            | 10         | 2.0E-01        | 1.4         | 3         | 15         | 6.0E-08        | 5.5         | 0        | 14        | 71379329         | transmembrane receptor  |           |       |



|                |                                                       |           |           |                |            |          |           |                |            |          |           |                 |                           |
|----------------|-------------------------------------------------------|-----------|-----------|----------------|------------|----------|-----------|----------------|------------|----------|-----------|-----------------|---------------------------|
| S100a9         | S100 calcium binding protein A9 (calgranulin B)       | 1         | 0         | 2.4E-01        | 0.0        | 1        | 8         | 1.4E-04        | 5.5        | 3        | 90496651  | other           |                           |
| Syn1           | Syn1                                                  | 7         | 6         | 8.8E-01        | 0.9        | 11       | 57        | 8.6E-26        | 5.4        | 0        | 20450238  | transporter     |                           |
| Pdia4          | Protein disulfide isomerase associated 4              | 21        | 13        | 1.9E-02        | 0.6        | 8        | 45        | 1.5E-20        | 5.4        | 7        | 6         | 47746358        | enzyme                    |
| <b>Col18a1</b> | <b>Collagen, type XVIII, alpha 1</b>                  | <b>7</b>  | <b>11</b> | <b>4.5E-02</b> | <b>1.7</b> | <b>6</b> | <b>29</b> | <b>5.2E-14</b> | <b>5.3</b> | <b>1</b> | <b>10</b> | <b>76515903</b> | <b>other</b>              |
| Frzb           | Frizzled-related protein                              | 16        | 46        | 1.0E-12        | 2.9        | 17       | 92        | 1.1E-40        | 5.3        | 0        | 2         | 80252641        | other                     |
| BC011426       | CDNA sequence BC011426                                | 7         | 7         | 9.5E-01        | 1.0        | 2        | 12        | 2.5E-06        | 5.3        | 3        | 17        | 56037972        | other                     |
| St8sia4        | ST8 alpha-N-acetyl-neuraminide alpha-2,8-sialyltr     | 9         | 8         | 1.0E+00        | 1.0        | 1        | 7         | 2.7E-04        | 5.2        | 2        | 1         | 97484775        | enzyme                    |
| Cilp           | Cartilage intermediate layer protein, nucleotide py   | 20        | 86        | 8.3E-34        | 4.3        | 31       | 159       | 1.3E-66        | 5.1        | 2        | 9         | 65128324        | phosphatase               |
| Slc16a3        | Solute carrier family 16 (monocarboxylic acid trans   | 4         | 9         | 1.7E-02        | 2.1        | 2        | 10        | 2.3E-05        | 5.1        | 0        | 11        | 120818342       | transporter               |
| Ndr3           | N-myc downstream regulated gene 3                     | 13        | 9         | 2.7E-01        | 0.7        | 3        | 14        | 4.1E-07        | 5.1        | 6        | 2         | 156753387       | other                     |
| Lox3           | Lysyl oxidase-like 3                                  | 10        | 11        | 6.0E-01        | 1.1        | 7        | 36        | 2.7E-16        | 5.0        | 1        | 6         | 83001272        | enzyme                    |
| Tmem97         | Transmembrane protein 97                              | 11        | 13        | 5.2E-01        | 1.2        | 5        | 25        | 1.4E-11        | 5.0        | 2        | 16        | 22231651        | other                     |
| Ap3m2          | Adaptor-related protein complex 3, mu 2 subunit       | 3         | 6         | 7.0E-02        | 2.0        | 1        | 7         | 5.2E-04        | 4.9        | 0        | 8         | 23897859        | transporter               |
| Angpt7         | Angiopoietin-like 7                                   | 10        | 10        | 9.4E-01        | 1.0        | 3        | 16        | 6.8E-08        | 4.9        | 0        | 4         | 147869597       | other                     |
| Meox1          | Mesenchyme homeobox 1                                 | 9         | 7         | 4.5E-01        | 0.8        | 8        | 38        | 1.6E-16        | 4.9        | 2        | 11        | 101738949       | transcription regulator   |
| 4833428C12Rik  | RIKEN cDNA 4833428C12 gene                            | 8         | 16        | 1.8E-03        | 2.1        | 2        | 12        | 3.6E-06        | 4.9        | 2        | 3         | 115642037       |                           |
| Sh3bgr3        | SH3 domain binding glutamic acid-rich protein-like    | 24        | 65        | 1.3E-15        | 2.7        | 35       | 166       | 1.3E-66        | 4.8        | 1        | 4         | 133684576       | other                     |
| Lhfp2          | Lipoma HMGIC fusion partner-like 2                    | 22        | 29        | 1.2E-01        | 1.3        | 24       | 114       | 3.6E-46        | 4.8        | 1        | 13        | 94965023        | enzyme                    |
| Mm.382134      | Visual cortex cDNA, RIKEN full-length enriched lib    | 4         | 7         | 7.6E-02        | 1.8        | 2        | 8         | 2.0E-04        | 4.8        |          | 5         | 117841422       |                           |
| Gpr109a        | G protein-coupled receptor 109A                       | 4         | 15        | 2.2E-06        | 3.8        | 3        | 14        | 5.8E-07        | 4.7        |          | 5         | 124313585       |                           |
| Lyp3           | Lysophospholipase 3                                   | 7         | 13        | 1.6E-02        | 1.9        | 2        | 12        | 6.8E-06        | 4.7        | 2        | 8         | 108688341       | enzyme                    |
| Bace2          | Beta-site APP-cleaving enzyme 2                       | 6         | 9         | 1.7E-01        | 1.5        | 2        | 12        | 6.8E-06        | 4.7        | 1        | 16        | 97658437        | peptidase                 |
| Rai14          | Retinoic acid induced 14                              | 24        | 22        | 6.8E-01        | 0.9        | 16       | 74        | 4.8E-30        | 4.7        | 4        | 15        | 10499128        | transcription regulator   |
| Edg5           | Endothelial differentiation, sphingolipid G-protein-c | 6         | 11        | 2.6E-02        | 1.9        | 3        | 15        | 2.4E-07        | 4.7        | 1        | 9         | 20770604        | -protein coupled receptor |
| Chac1          | ChaC, cation transport regulator-like 1 (E. coli)     | 7         | 6         | 6.3E-01        | 0.8        | 7        | 33        | 3.8E-14        | 4.6        | 2        | 2         | 119179748       | other                     |
| Fat1           | FAT tumor suppressor homolog 1 (Drosophila)           | 17        | 17        | 9.0E-01        | 1.0        | 8        | 38        | 5.8E-16        | 4.6        | 8        | 8         | 46137382        |                           |
| 1110018M03Rik  | RIKEN cDNA 1110018M03 gene                            | 18        | 24        | 7.0E-02        | 1.4        | 6        | 29        | 1.9E-12        | 4.6        | 1        | 2         | 110201620       |                           |
| Angpt4         | Angiopoietin-like 4                                   | 34        | 47        | 1.1E-02        | 1.4        | 24       | 109       | 1.3E-42        | 4.6        | 5        | 17        | 33911937        | other                     |
| B3gint1        | UDP-GalNAc:betaGlcNAc beta 1,3-galactosaminy          | 7         | 8         | 5.4E-01        | 1.2        | 2        | 11        | 1.3E-05        | 4.6        | 1        | 3         | 69378737        | enzyme                    |
| Inhba          | Inhibin beta-A                                        | 17        | 36        | 3.1E-06        | 2.1        | 16       | 71        | 6.0E-28        | 4.5        | 0        | 13        | 16118932        | growth factor             |
| Zfp646         | Zinc finger protein 646                               | 7         | 5         | 3.8E-01        | 0.7        | 3        | 12        | 5.0E-06        | 4.5        | 2        | 7         | 135029271       |                           |
| Nt5c           | 5',3'-nucleotidase, cytosolic                         | 10        | 4         | 8.9E-03        | 0.4        | 4        | 17        | 7.0E-08        | 4.5        | 2        | 11        | 115352204       | phosphatase               |
| Eno2           | Enolase 2, gamma neuronal                             | 5         | 5         | 8.6E-01        | 1.0        | 2        | 9         | 1.5E-04        | 4.5        | 0        | 6         | 124710450       | enzyme                    |
| Efemp2         | Epidermal growth factor-containing fibulin-like exte  | 14        | 29        | 3.5E-05        | 2.1        | 14       | 63        | 7.4E-25        | 4.5        | 1        | 19        | 5481741         | other                     |
| Fzd1           | Frizzled homolog 1 (Drosophila)                       | 18        | 21        | 3.7E-01        | 1.2        | 14       | 63        | 7.4E-25        | 4.5        | 3        | 5         | 4753938         | -protein coupled receptor |
| Sparc          | Secreted acidic cysteine rich glycoprotein            | 1735      | 1948      | 1.2E-09        | 1.1        | 1611     | 7183      | 0.0E+00        | 4.5        | 195      | 11        | 55208002        | other                     |
| Cd109          | CD109 antigen                                         | 2         | 4         | 1.7E-01        | 1.9        | 4        | 18        | 2.8E-08        | 4.5        | 0        | 9         | 78563546        | other                     |
| Serpina3n      | Serine (or cysteine) peptidase inhibitor, clade A, m  | 159       | 229       | 4.3E-10        | 1.4        | 208      | 921       | 0.0E+00        | 4.4        | 2        | 12        | 105652539       |                           |
| Endod1         | Endonuclease domain containing 1                      | 14        | 23        | 6.7E-03        | 1.7        | 10       | 43        | 4.1E-17        | 4.4        | 3        | 9         | 14158515        | enzyme                    |
| Pscbbp         | Pleckstrin homology, Sec7 and coiled-coil domain      | 6         | 15        | 4.7E-04        | 2.4        | 4        | 16        | 3.2E-07        | 4.4        |          | 2         | 57985220        | other                     |
| Il3ra          | Interleukin 3 receptor, alpha chain                   | 10        | 16        | 3.0E-02        | 1.6        | 4        | 16        | 3.2E-07        | 4.4        | 0        | 14        | 15183285        | transmembrane receptor    |
| Cdo1           | Cysteine dioxygenase 1, cytosolic                     | 6         | 7         | 8.7E-01        | 1.0        | 2        | 11        | 2.3E-05        | 4.4        | 1        | 18        | 46873260        | enzyme                    |
| Fn1            | Fibronectin 1                                         | 123       | 76        | 1.5E-08        | 0.6        | 98       | 428       | 1.3E-156       | 4.4        | 5        | 1         | 71632152        | enzyme                    |
| 1200009F10Rik  | RIKEN cDNA 1200009F10 gene                            | 43        | 56        | 2.3E-02        | 1.3        | 25       | 112       | 3.4E-42        | 4.4        | 10       | 10        | 90561297        |                           |
| Rab15          | RAB15, member RAS oncogene family                     | 4         | 5         | 6.1E-01        | 1.2        | 8        | 34        | 7.0E-14        | 4.4        | 0        | 12        | 77899108        | enzyme                    |
| Wisp2          | WNT1 inducible signaling pathway protein 2            | 12        | 18        | 4.8E-02        | 1.5        | 5        | 21        | 3.4E-09        | 4.3        | 0        | 2         | 163658800       | growth factor             |
| Col5a1         | Col5a1                                                | 59        | 96        | 1.9E-07        | 1.6        | 63       | 272       | 2.3E-98        | 4.3        | 1        | 2         | 27894508        | other                     |
| 1110006O17Rik  | RIKEN cDNA 1110006O17 gene                            | 24        | 21        | 4.1E-01        | 0.9        | 10       | 43        | 9.8E-17        | 4.3        | 4        | 18        | 35872875        |                           |
| Fbx14          | F-box and leucine-rich repeat protein 14              | 30        | 28        | 7.7E-01        | 1.0        | 12       | 49        | 4.6E-19        | 4.3        | 12       | 6         | 119432481       | other                     |
| Rbp1           | Retinol binding protein 1, cellular                   | 55        | 95        | 5.5E-09        | 1.7        | 64       | 270       | 5.7E-96        | 4.2        | 2        | 9         | 98346852        | transporter               |
| Col6a1         | Collagen, type VI, alpha 1                            | 117       | 260       | 4.8E-40        | 2.2        | 127      | 532       | 6.0E-187       | 4.2        | 1        | 10        | 76171604        | other                     |
| Pdk3           | Pyruvate dehydrogenase kinase, isoenzyme 3            | 9         | 10        | 5.7E-01        | 1.1        | 4        | 15        | 1.1E-06        | 4.2        | 0        | 20        | 91010413        | kinase                    |
| Col5a2         | Collagen, type V, alpha 2                             | 121       | 117       | 6.6E-01        | 1.0        | 81       | 339       | 9.3E-119       | 4.2        | 4        | 1         | 45431175        | other                     |
| Pxdn           | Peroxidasin homolog (Drosophila)                      | 22        | 20        | 6.4E-01        | 0.9        | 15       | 64        | 1.0E-23        | 4.1        | 11       | 12        | 30702133        | other                     |
| Creld2         | Cysteine-rich with EGF-like domains 2                 | 16        | 18        | 4.3E-01        | 1.2        | 11       | 46        | 2.9E-17        | 4.1        | 7        | 15        | 88656937        | other                     |
| F2r            | Coagulation factor II (thrombin) receptor             | 55        | 91        | 9.5E-08        | 1.7        | 46       | 189       | 9.9E-66        | 4.1        | 3        | 13        | 96372586        | -protein coupled receptor |
| S100a8         | S100 calcium binding protein A8 (calgranulin A)       | 4         | 4         | 8.4E-01        | 1.0        | 6        | 25        | 5.3E-10        | 4.1        | 0        | 3         | 90473542        | other                     |
| 1500041B16Rik  | RIKEN cDNA 1500041B16 gene                            | 13        | 7         | 4.0E-02        | 0.6        | 3        | 14        | 4.8E-06        | 4.1        | 0        | 11        | 16979029        |                           |
| Armc7          | Armadillo repeat containing 7                         | 8         | 9         | 5.3E-01        | 1.2        | 2        | 10        | 7.8E-05        | 4.1        | 0        | 11        | 115351224       | other                     |
| <b>Pold4</b>   | <b>Polymerase (DNA-directed), delta 4</b>             | <b>15</b> | <b>16</b> | <b>5.8E-01</b> | <b>1.1</b> | <b>7</b> | <b>28</b> | <b>6.4E-11</b> | <b>4.0</b> | <b>5</b> | <b>19</b> | <b>4233443</b>  | <b>enzyme</b>             |
| Lox            | Lysyl oxidase                                         | 58        | 62        | 5.2E-01        | 1.1        | 90       | 363       | 4.5E-123       | 4.0        | 2        | 18        | 52675764        | enzyme                    |
| Col4a2         | Collagen, type IV, alpha 2                            | 173       | 250       | 6.7E-11        | 1.4        | 251      | 1007      | 0.0E+00        | 4.0        | 57       | 8         | 11449080        | other                     |
| S100a4         | S100 calcium binding protein A4                       | 7         | 25        | 3.3E-09        | 3.5        | 33       | 131       | 4.9E-45        | 4.0        | 0        | 3         | 90409920        | other                     |
| Itp3           | Inositol 1,4,5-triphosphate receptor 3                | 6         | 8         | 2.8E-01        | 1.4        | 3        | 12        | 2.2E-05        | 4.0        | 0        | 17        | 27259104        | ion channel               |
| 1700016P03Rik  | RIKEN cDNA 1700016P03 gene                            | 5         | 4         | 6.2E-01        | 0.8        | 3        | 12        | 2.2E-05        | 4.0        | 0        | 11        | 74988822        |                           |
| Pcsk5          | Proprotein convertase subtilisin/kexin type 5         | 7         | 6         | 6.7E-01        | 0.9        | 3        | 12        | 2.2E-05        | 4.0        | 0        | 19        | 17635220        | peptidase                 |
| Thbs3          | Thrombospondin 3                                      | 4         | 8         | 3.9E-02        | 1.9        | 3        | 11        | 5.5E-05        | 4.0        | 0        | 3         | 89030286        | other                     |
| Col8a1         | Col8a1                                                | 165       | 207       | 1.2E-04        | 1.3        | 163      | 642       | 5.6E-212       | 4.0        | 2        | 16        | 57624461        | other                     |
| D1Bwg1363e     | DNA segment, Chr 1, Brigham & Women's Geneti          | 15        | 20        | 1.7E-01        | 1.3        | 19       | 73        | 9.8E-26        | 4.0        | 3        | 1         | 75471413        |                           |

|               |                                                      |     |     |         |     |     |      |          |     |    |    |           |                           |
|---------------|------------------------------------------------------|-----|-----|---------|-----|-----|------|----------|-----|----|----|-----------|---------------------------|
| Pgm3          | Pgm3                                                 | 10  | 11  | 4.9E-01 | 1.2 | 4   | 17   | 4.0E-07  | 3.9 | 3  | 9  | 86448647  | enzyme                    |
| Itgb3         | Integrin beta 3                                      | 2   | 4   | 6.4E-02 | 2.3 | 4   | 15   | 2.5E-06  | 3.9 | 0  | 11 | 104526887 | transmembrane receptor    |
| Hdc           | Histidine decarboxylase                              | 3   | 9   | 3.7E-03 | 2.6 | 2   | 8    | 9.2E-04  | 3.9 | 0  | 2  | 126419508 | enzyme                    |
| Slc20a1       | Solute carrier family 20, member 1                   | 115 | 175 | 5.8E-10 | 1.5 | 100 | 387  | 7.5E-126 | 3.9 | 18 | 2  | 129037297 | transporter               |
| Prss23        | Protease, serine, 23                                 | 19  | 40  | 7.3E-07 | 2.1 | 38  | 146  | 8.9E-49  | 3.9 | 2  | 7  | 96658217  | peptidase                 |
| Sfmbt1        | Scm-like with four mbt domains 1                     | 10  | 12  | 4.8E-01 | 1.2 | 6   | 23   | 5.3E-09  | 3.9 | 1  | 14 | 31630947  | other                     |
| Ssh3          | Slingshot homolog 3 (Drosophila)                     | 6   | 13  | 2.6E-03 | 2.3 | 5   | 18   | 2.8E-07  | 3.9 | 3  | 19 | 4261814   | phosphatase               |
| Ptgrn         | Prostaglandin F2 receptor negative regulator         | 29  | 39  | 2.9E-02 | 1.4 | 20  | 76   | 1.0E-25  | 3.8 | 8  | 3  | 100844449 | other                     |
| Tmem158       | Tmem158                                              | 9   | 8   | 8.5E-01 | 0.9 | 5   | 20   | 8.1E-08  | 3.8 | 0  | 9  | 123168241 | other                     |
| Srd5a2l       | Steroid 5 alpha-reductase 2-like                     | 8   | 9   | 5.3E-01 | 1.2 | 5   | 18   | 5.0E-07  | 3.8 | 1  | 5  | 76584244  | other                     |
| Emb           | Embigin                                              | 5   | 6   | 6.6E-01 | 1.1 | 6   | 21   | 4.1E-08  | 3.7 | 0  | 13 | 118062849 | other                     |
| Bgn           | Biglycan                                             | 409 | 779 | 6.8E-82 | 1.9 | 439 | 1620 | 0.0E+00  | 3.7 | 7  | 20 | 70740482  | other                     |
| Col4a1        | Collagen, type IV, alpha 1                           | 277 | 461 | 4.7E-33 | 1.7 | 327 | 1201 | 0.0E+00  | 3.7 | 47 | 8  | 11198924  | other                     |
| Unc5b         | Unc-5 homolog B (C. elegans)                         | 16  | 18  | 5.5E-01 | 1.1 | 12  | 46   | 1.6E-15  | 3.7 | 3  | 10 | 60225501  | transmembrane receptor    |
| Adams2        | A disintegrin-like and metallopeptidase (reprolysin) | 70  | 98  | 1.5E-04 | 1.4 | 48  | 175  | 8.2E-55  | 3.7 | 2  | 11 | 50617397  | peptidase                 |
| Plp2          | Proteolipid protein 2                                | 21  | 37  | 7.3E-05 | 1.8 | 25  | 90   | 6.8E-29  | 3.7 | 10 | 2  | 75646414  | transporter               |
| Wt1           | Wilms tumor homolog                                  | 6   | 8   | 3.7E-01 | 1.3 | 2   | 9    | 4.5E-04  | 3.6 | 2  | 2  | 105012900 | transcription regulator   |
| Stx2          | Syntaxin 2                                           | 10  | 10  | 1.0E+00 | 1.0 | 9   | 32   | 3.3E-11  | 3.6 | 1  | 5  | 129490732 | transporter               |
| Qsox1         | Quiescin Q6 sulfhydryl oxidase 1                     | 12  | 12  | 9.9E-01 | 1.0 | 7   | 26   | 2.4E-09  | 3.6 | 5  | 1  | 157625792 | enzyme                    |
| Col6a3        | Collagen, type VI, alpha 3                           | 13  | 20  | 3.0E-02 | 1.5 | 15  | 54   | 1.4E-17  | 3.6 | 0  | 1  | 92663720  | other                     |
| Ccr1          | Chemokine (C-C motif) receptor-like 1                | 14  | 17  | 2.2E-01 | 1.3 | 5   | 19   | 4.3E-07  | 3.6 | 0  | 9  | 104000525 | -protein coupled receptor |
| Ptms          | Parathyrosin                                         | 63  | 86  | 6.5E-04 | 1.4 | 46  | 166  | 7.1E-51  | 3.6 | 9  | 6  | 124864201 | other                     |
| Ptprf         | Protein tyrosine phosphatase, receptor type, F       | 7   | 7   | 1.0E+00 | 1.0 | 4   | 15   | 9.5E-06  | 3.6 | 2  | 4  | 117881163 | phosphatase               |
| 5033428122Rik | RIKEN cDNA 5033428122 gene                           | 6   | 10  | 8.1E-02 | 1.6 | 6   | 21   | 8.7E-08  | 3.5 | 1  | 8  | 59824097  | other                     |
| Ptplb         | Protein tyrosine phosphatase-like (proline instead   | 14  | 19  | 1.7E-01 | 1.3 | 9   | 32   | 7.0E-11  | 3.5 | 5  | 16 | 35106423  | phosphatase               |
| Sh3bgrl2      | SH3 domain binding glutamic acid-rich protein like   | 7   | 13  | 1.2E-02 | 1.9 | 5   | 17   | 1.9E-06  | 3.5 | 0  | 9  | 83493074  | other                     |
| Fkbp14        | FK506 binding protein 14                             | 18  | 20  | 6.8E-01 | 1.1 | 13  | 46   | 8.5E-15  | 3.5 | 6  | 6  | 54527695  | enzyme                    |
| Ltb4dh        | Leukotriene B4 12-hydroxydehydrogenase               | 21  | 17  | 3.9E-01 | 0.8 | 10  | 35   | 1.0E-11  | 3.5 | 3  | 10 | 49092830  | enzyme                    |
| Kdelr3        | KDEL (Lys-Asp-Glu-Leu) endoplasmic reticulum p       | 27  | 30  | 4.3E-01 | 1.1 | 22  | 77   | 1.4E-23  | 3.5 | 3  | 15 | 79357982  | transporter               |
| Sdf2l1        | Stromal cell-derived factor 2-like 1                 | 8   | 7   | 4.7E-01 | 0.8 | 9   | 31   | 2.9E-10  | 3.5 | 1  | 16 | 17130693  | other                     |
| Sox4          | SRY-box containing gene 4                            | 25  | 30  | 2.2E-01 | 1.2 | 14  | 49   | 1.2E-15  | 3.4 | 12 | 13 | 29042713  | transcription regulator   |
| C030046G05    | Hypothetical protein C030046G05                      | 20  | 17  | 4.7E-01 | 0.9 | 6   | 22   | 1.1E-07  | 3.4 | 1  | 13 | 105370575 | other                     |
| Clec4a2       | C-type lectin domain family 4, member a2             | 23  | 22  | 8.4E-01 | 1.0 | 11  | 38   | 3.5E-12  | 3.4 | 0  | 6  | 123092776 | other                     |
| Epn2          | Epsin 2                                              | 11  | 11  | 9.0E-01 | 1.0 | 4   | 15   | 1.1E-05  | 3.4 | 4  | 11 | 61332252  | other                     |
| Cfb           | Complement factor B                                  | 4   | 11  | 1.4E-03 | 2.6 | 4   | 13   | 4.1E-05  | 3.4 | 0  | 17 | 34993325  | peptidase                 |
| Pdia6         | Protein disulfide isomerase associated 6             | 84  | 128 | 7.5E-08 | 1.5 | 105 | 356  | 1.7E-101 | 3.4 | 36 | 12 | 17290915  | enzyme                    |
| Ucp2          | Uncoupling protein 2 (mitochondrial, proton carrier  | 65  | 96  | 2.0E-05 | 1.5 | 70  | 238  | 2.1E-68  | 3.4 | 5  | 7  | 107647867 | transporter               |
| Asah1         | N-acylseringosine amidohydrolase 1                   | 82  | 81  | 9.9E-01 | 1.0 | 36  | 121  | 1.5E-35  | 3.4 | 17 | 8  | 42426673  | enzyme                    |
| Ptgis         | Prostaglandin I2 (prostaglyclin) synthase            | 44  | 71  | 6.6E-06 | 1.6 | 30  | 101  | 4.2E-30  | 3.4 | 1  | 2  | 167032291 | enzyme                    |
| Serpinf1      | Serine (or cysteine) peptidase inhibitor, clade F, m | 139 | 227 | 4.0E-16 | 1.6 | 127 | 429  | 2.4E-121 | 3.4 | 2  | 11 | 75223530  | other                     |
| Tmem87b       | Transmembrane protein 87B                            | 19  | 14  | 1.3E-01 | 0.7 | 6   | 21   | 1.8E-07  | 3.4 | 10 | 2  | 128679623 | other                     |
| Sp3c3         | Signal peptidase complex subunit 3 homolog (S. d     | 57  | 70  | 4.8E-02 | 1.2 | 46  | 152  | 2.7E-43  | 3.3 | 25 | 8  | 55606296  | peptidase                 |
| Necap2        | NECAP endocytosis associated 2                       | 19  | 27  | 3.6E-02 | 1.4 | 16  | 54   | 1.8E-16  | 3.3 | 4  | 4  | 140622831 | other                     |
| Scarf2        | Scavenger receptor class F, member 2                 | 4   | 10  | 3.2E-03 | 2.5 | 7   | 24   | 6.1E-08  | 3.3 | 0  | 16 | 17808163  | transmembrane receptor    |
| Lrrc33        | Leucine rich repeat containing 33                    | 10  | 15  | 5.1E-02 | 1.6 | 6   | 19   | 1.1E-06  | 3.3 | 1  | 16 | 32143343  | other                     |
| Opr1          | Opioid receptor, sigma 1                             | 10  | 8   | 3.7E-01 | 0.8 | 4   | 13   | 7.0E-05  | 3.3 | 4  | 4  | 41685619  | -protein coupled receptor |
| Ppic          | Peptidylprolyl isomerase C                           | 30  | 29  | 8.5E-01 | 1.0 | 20  | 68   | 6.4E-20  | 3.3 | 6  | 18 | 53566039  | enzyme                    |
| Pstpip1       | Proline-serine-threonine phosphatase-interacting     | 4   | 3   | 7.4E-01 | 0.8 | 3   | 11   | 2.5E-04  | 3.3 | 0  | 9  | 55976684  | other                     |
| Sh3d19        | SH3 domain protein D19                               | 10  | 10  | 8.5E-01 | 1.0 | 3   | 11   | 2.5E-04  | 3.3 | 0  | 3  | 85932113  | enzyme                    |
| Ass1          | Argininosuccinate synthetase 1                       | 4   | 9   | 1.4E-02 | 2.1 | 7   | 25   | 4.2E-08  | 3.3 | 0  | 2  | 31374246  | enzyme                    |
| 2610027C15Rik | RIKEN cDNA 2610027C15 gene                           | 18  | 17  | 8.9E-01 | 1.0 | 9   | 28   | 5.9E-09  | 3.3 | 3  | 4  | 125826670 | other                     |
| Rrm2          | Ribonucleotide reductase M2                          | 8   | 7   | 5.7E-01 | 0.8 | 5   | 16   | 9.4E-06  | 3.3 | 2  | 12 | 25398834  | enzyme                    |
| Kctd17        | Potassium channel tetramerisation domain contain     | 13  | 15  | 3.6E-01 | 1.2 | 11  | 35   | 6.9E-11  | 3.3 | 2  | 15 | 78269693  | other                     |
| 2010109N14Rik | RIKEN cDNA 2010109N14 gene                           | 40  | 35  | 3.4E-01 | 0.9 | 12  | 38   | 9.7E-12  | 3.2 | 9  | 3  | 123211087 | other                     |
| G6pdx         | Glucose-6-phosphate dehydrogenase X-linked           | 13  | 19  | 6.7E-02 | 1.4 | 9   | 29   | 2.9E-09  | 3.2 | 1  | 20 | 71654929  | other                     |
| Tmem115       | Transmembrane protein 115                            | 15  | 25  | 3.5E-03 | 1.7 | 14  | 45   | 2.8E-13  | 3.2 | 5  | 9  | 107440426 | other                     |
| Smardc2       | SWI/SNF related, matrix associated, actin depend     | 9   | 7   | 3.3E-01 | 0.7 | 4   | 12   | 1.2E-04  | 3.2 | 3  | 11 | 106125040 | transcription regulator   |
| AW208599      | Expressed sequence AW208599                          | 8   | 9   | 5.2E-01 | 1.2 | 4   | 12   | 1.2E-04  | 3.2 | 1  | 10 | 7433770   | other                     |
| 0610009O03Rik | RIKEN cDNA 0610009O03 gene                           | 7   | 15  | 1.9E-03 | 2.1 | 6   | 20   | 8.8E-07  | 3.2 | 2  | 5  | 34976841  | other                     |
| Rcn3          | Reticulocalbin 3, EF-hand calcium binding domain     | 63  | 101 | 1.2E-07 | 1.6 | 57  | 180  | 4.2E-48  | 3.2 | 0  | 7  | 52338587  | other                     |
| Col12a1       | Col12a1                                              | 5   | 7   | 2.3E-01 | 1.5 | 6   | 19   | 2.1E-06  | 3.2 | 0  | 9  | 79447006  | other                     |
| Sec16b        | SEC16 homolog B (S. cerevisiae)                      | 7   | 5   | 3.8E-01 | 0.7 | 4   | 14   | 5.7E-05  | 3.2 | 0  | 1  | 159498164 | other                     |
| C4b           | Complement component 4B (Chido blood group)          | 42  | 88  | 1.1E-12 | 2.1 | 64  | 200  | 7.7E-53  | 3.2 | 0  | 17 | 34946456  | other                     |
| Ccdc125       | Ccdc125                                              | 9   | 8   | 7.5E-01 | 0.9 | 8   | 25   | 5.8E-08  | 3.2 | 1  | 13 | 101443555 | other                     |
| Col15a1       | Collagen, type XV                                    | 283 | 346 | 1.4E-05 | 1.2 | 268 | 839  | 3.2E-214 | 3.1 | 8  | 4  | 47326007  | other                     |
| Cott1         | Coactosin-like 1 (Dictyostelium)                     | 22  | 15  | 6.1E-02 | 0.7 | 12  | 37   | 4.5E-11  | 3.1 | 0  | 8  | 122333684 | other                     |
| Cyp4v3        | Cytochrome P450, family 4, subfamily v, polypepti    | 16  | 22  | 1.3E-01 | 1.3 | 6   | 20   | 1.5E-06  | 3.1 | 1  | 8  | 46391277  | other                     |
| Paxip1        | PAX interacting (with transcription-activation doma  | 9   | 11  | 4.0E-01 | 1.2 | 5   | 15   | 3.9E-05  | 3.1 | 3  | 5  | 28068969  | other                     |
| Adcy7         | Adenylate cyclase 7                                  | 22  | 20  | 6.6E-01 | 0.9 | 14  | 45   | 6.2E-13  | 3.1 | 0  | 8  | 90853484  | enzyme                    |

|               |                                                             |            |            |                |            |            |            |                 |            |           |           |                  |                         |
|---------------|-------------------------------------------------------------|------------|------------|----------------|------------|------------|------------|-----------------|------------|-----------|-----------|------------------|-------------------------|
| 6030408B16Rik | RIKEN cDNA 6030408B16 gene                                  | 15         | 15         | 7.4E-01        | 1.1        | 10         | 30         | 3.8E-09         | 3.1        | 0         | 15        | 101126518        |                         |
| Mfap5         | Microfibrillar associated protein 5                         | 299        | 403        | 6.9E-12        | 1.4        | 331        | 1026       | 7.9E-258        | 3.1        | 4         | 6         | 122478531        | other                   |
| <b>Grrn</b>   | <b>Granulin</b>                                             | <b>220</b> | <b>389</b> | <b>5.2E-34</b> | <b>1.8</b> | <b>198</b> | <b>614</b> | <b>2.4E-155</b> | <b>3.1</b> | <b>18</b> | <b>11</b> | <b>102297918</b> | <b>growth factor</b>    |
| Prkcdpb       | Protein kinase C, delta binding protein                     | 5          | 15         | 1.1E-04        | 2.8        | 6          | 19         | 3.6E-06         | 3.1        | 1         | 7         | 112630569        | other                   |
| Zxdc          | ZXD family zinc finger C                                    | 14         | 17         | 3.1E-01        | 1.2        | 6          | 19         | 3.6E-06         | 3.1        | 6         | 6         | 90353209         | other                   |
| Txndc5        | Thioredoxin domain containing 5                             | 28         | 52         | 8.2E-07        | 1.9        | 35         | 107        | 2.0E-28         | 3.1        | 9         | 13        | 38592215         | enzyme                  |
| Lat2          | Linker for activation of T cells family, member 2           | 4          | 6          | 3.2E-01        | 1.4        | 4          | 13         | 1.4E-04         | 3.1        | 0         | 5         | 135084772        | other                   |
| Ephb4         | Eph receptor B4                                             | 14         | 15         | 7.0E-01        | 1.1        | 4          | 13         | 1.4E-04         | 3.1        | 6         | 5         | 137815175        | kinase                  |
| Deaf1         | Deformed epidermal autoregulatory factor 1 (Dros)           | 7          | 7          | 9.0E-01        | 1.0        | 4          | 13         | 1.4E-04         | 3.1        | 2         | 7         | 148483103        | transcription regulator |
| Fstl1         | Follistatin-like 1                                          | 919        | 1508       | 3.3E-99        | 1.6        | 1165       | 3576       | 0.0E+00         | 3.1        | 18        | 16        | 37835745         | other                   |
| Ms4a7         | Membrane-spanning 4-domains, subfamily A, member 7          | 33         | 79         | 2.3E-15        | 2.4        | 51         | 155        | 4.0E+00         | 3.1        | 19        | 19        | 11407841         | other                   |
| 9530076L18    | Hypothetical protein 9530076L18                             | 48         | 74         | 4.7E-05        | 1.5        | 95         | 290        | 9.3E-73         | 3.1        | 0         | 13        | 16123345         |                         |
| Col6a2        | Collagen, type VI, alpha 2                                  | 137        | 244        | 1.2E-22        | 1.8        | 218        | 661        | 9.3E-162        | 3.0        | 1         | 10        | 76058537         | other                   |
| Golga7        | Golgi autoantigen, golgin subfamily a, 7                    | 34         | 46         | 1.3E-02        | 1.4        | 24         | 73         | 2.6E-19         | 3.0        | 8         | 20        | 8904461          | other                   |
| Pla2g4a       | Phospholipase A2, group IVA (cytosolic, calcium-dependent)  | 19         | 23         | 2.0E-01        | 1.3        | 16         | 48         | 4.5E-13         | 3.0        | 1         | 1         | 151676827        | enzyme                  |
| Ihpk1         | Inositol hexaphosphate kinase 1                             | 14         | 15         | 7.1E-01        | 1.1        | 15         | 45         | 2.2E-12         | 3.0        | 5         | 9         | 107950464        | kinase                  |
| Sgpp1         | Sphingosine-1-phosphate phosphatase 1                       | 11         | 16         | 8.7E-02        | 1.4        | 8          | 24         | 2.6E-07         | 3.0        | 5         | 12        | 76816355         | phosphatase             |
| Arhgef10      | Rho guanine nucleotide exchange factor (GEF) 10             | 9          | 10         | 6.7E-01        | 1.1        | 4          | 12         | 2.3E-04         | 3.0        | 4         | 8         | 15000816         | peptidase               |
| Ly6k          | Lymphocyte antigen 6 complex, locus K                       | 8          | 16         | 4.4E-03        | 1.9        | 6          | 17         | 1.4E-05         | 3.0        | 15        | 7         | 74627357         | other                   |
| Prr14         | Proline rich 14                                             | 12         | 13         | 8.3E-01        | 1.0        | 6          | 18         | 9.8E-06         | 3.0        | 5         | 7         | 134619423        | other                   |
| Hspg2         | Heparan sulfate proteoglycan 2                              | 80         | 119        | 1.1E-06        | 1.5        | 70         | 209        | 5.2E-51         | 3.0        | 19        | 4         | 137126105        | other                   |
| Sgms2         | Sphingomyelin synthase 2                                    | 4          | 7          | 9.8E-02        | 1.7        | 5          | 14         | 1.1E-04         | 3.0        | 3         | 3         | 131025655        | enzyme                  |
| Mrc2          | Mannose receptor, C type 2                                  | 21         | 33         | 4.1E-03        | 1.6        | 22         | 64         | 1.3E-16         | 3.0        | 2         | 11        | 105212225        | transmembrane receptor  |
| Atp8b2        | ATPase, class I, type 8B, member 2                          | 26         | 24         | 6.9E-01        | 0.9        | 15         | 43         | 8.6E-12         | 3.0        | 2         | 11        | 51409913         | transporter             |
| Ctsz          | Cathepsin Z                                                 | 141        | 228        | 7.3E-16        | 1.6        | 83         | 244        | 1.1E-58         | 3.0        | 6         | 2         | 174253051        | peptidase               |
| Serpinc2      | Serine (or cysteine) peptidase inhibitor, clade B, member 2 | 13         | 21         | 1.8E-02        | 1.6        | 27         | 81         | 1.5E-20         | 3.0        | 1         | 1         | 109422059        | other                   |
| Gatm          | Glycine amidinotransferase (L-arginine:glycine antiporter)  | 25         | 20         | 2.3E-01        | 0.8        | 10         | 30         | 1.4E-08         | 3.0        | 2         | 2         | 122420798        | enzyme                  |
| Ctsk          | Cathepsin K                                                 | 62         | 59         | 6.4E-01        | 1.0        | 47         | 138        | 1.4E-33         | 2.9        | 2         | 3         | 95313221         | peptidase               |
| Stard3nl      | STARD3 N-terminal like                                      | 27         | 23         | 4.0E-01        | 0.9        | 16         | 48         | 1.5E-12         | 2.9        | 13        | 13        | 19449592         | other                   |
| Creb3         | CAMP responsive element binding protein 3                   | 20         | 14         | 9.2E-02        | 0.7        | 11         | 31         | 1.5E-08         | 2.9        | 10        | 4         | 43579420         | transcription regulator |
| Prdm4         | PR domain containing 4                                      | 20         | 14         | 8.2E-02        | 0.7        | 10         | 30         | 2.2E-08         | 2.9        | 6         | 10        | 85355184         | transcription regulator |
| <b>Rac2</b>   | <b>RAS-related C3 botulinum substrate 2</b>                 | <b>19</b>  | <b>28</b>  | <b>2.1E-02</b> | <b>1.5</b> | <b>16</b>  | <b>46</b>  | <b>5.2E-12</b>  | <b>2.9</b> | <b>0</b>  | <b>15</b> | <b>78391577</b>  | <b>enzyme</b>           |
| Map3k3        | Mitogen activated protein kinase kinase kinase 3            | 21         | 19         | 7.0E-01        | 0.9        | 11         | 31         | 1.1E-08         | 2.9        | 9         | 11        | 106016453        | kinase                  |
| Sox17         | SRY-box containing gene 17                                  | 17         | 16         | 9.0E-01        | 1.0        | 4          | 13         | 2.6E-04         | 2.9        | 7         | 1         | 4481507          | transcription regulator |
| Nupr1         | Nuclear protein 1                                           | 83         | 121        | 2.9E-06        | 1.5        | 101        | 291        | 8.5E-68         | 2.9        | 0         | 7         | 133768473        |                         |
| Apold1        | Apolipoprotein L domain containing 1                        | 25         | 40         | 7.5E-04        | 1.6        | 9          | 27         | 1.1E-07         | 2.9        | 1         | 6         | 134936729        | other                   |
| Fut11         | Fut11                                                       | 11         | 9          | 5.6E-01        | 0.8        | 5          | 14         | 1.8E-04         | 2.9        | 2         | 14        | 21517556         | enzyme                  |
| Ccdc80        | Coiled-coil domain containing 80                            | 216        | 355        | 5.7E-25        | 1.7        | 170        | 488        | 1.7E-111        | 2.9        | 7         | 16        | 45127606         | other                   |
| Stc1          | Stanniocalcin 1                                             | 10         | 12         | 3.9E-01        | 1.2        | 5          | 15         | 8.3E-05         | 2.9        | 0         | 14        | 69657947         | kinase                  |
| P4hb          | Prolyl 4-hydroxylase, beta polypeptide                      | 248        | 287        | 3.5E-03        | 1.2        | 205        | 588        | 1.8E-133        | 2.9        | 67        | 11        | 120421772        | enzyme                  |
| Igf1bp6       | Insulin-like growth factor binding protein 6                | 43         | 88         | 1.2E-12        | 2.1        | 39         | 111        | 2.0E-26         | 2.9        | 1         | 15        | 101975014        | other                   |
| <b>Cd9</b>    | <b>CD9 antigen</b>                                          | <b>133</b> | <b>220</b> | <b>1.4E-16</b> | <b>1.7</b> | <b>140</b> | <b>397</b> | <b>5.4E-90</b>  | <b>2.9</b> | <b>5</b>  | <b>6</b>  | <b>125410721</b> | <b>other</b>            |
| Lapm5         | Lysosomal-associated protein transmembrane 5                | 71         | 103        | 2.1E-05        | 1.5        | 58         | 165        | 2.8E-38         | 2.8        | 0         | 4         | 130492063        | other                   |
| Mfsd11        | Major facilitator superfamily domain containing 11          | 29         | 32         | 4.4E-01        | 1.1        | 17         | 49         | 2.2E-12         | 2.8        | 12        | 11        | 116735613        | other                   |
| Rnh1          | Ribonuclease/angiogenesis inhibitor 1                       | 84         | 143        | 1.9E-12        | 1.7        | 73         | 206        | 4.8E-47         | 2.8        | 8         | 7         | 148346617        | other                   |
| Rel1          | RELT-like 1                                                 | 29         | 50         | 1.8E-05        | 1.7        | 23         | 64         | 8.7E-16         | 2.8        | 1         | 5         | 64300961         | other                   |
| Ctsh          | Cathepsin H                                                 | 43         | 54         | 3.5E-02        | 1.3        | 17         | 48         | 3.5E-12         | 2.8        | 4         | 9         | 89970859         | peptidase               |
| <b>Ereg</b>   | <b>Epiregulin</b>                                           | <b>42</b>  | <b>63</b>  | <b>2.8E-04</b> | <b>1.5</b> | <b>92</b>  | <b>258</b> | <b>6.6E-58</b>  | <b>2.8</b> | <b>5</b>  | <b>5</b>  | <b>91522559</b>  | <b>growth factor</b>    |
| Ccnf          | Cyclin F                                                    | 3          | 5          | 1.5E-01        | 1.8        | 4          | 12         | 4.3E-04         | 2.8        | 17        |           | 24360304         | other                   |
| Mapk8ip1      | Mitogen activated protein kinase 8 interacting protein 1    | 6          | 9          | 2.4E-01        | 1.4        | 4          | 12         | 4.3E-04         | 2.8        | 0         | 2         | 92224151         | other                   |
| Src           | Rous sarcoma oncogene                                       | 13         | 14         | 5.9E-01        | 1.1        | 4          | 12         | 4.3E-04         | 2.8        | 0         | 2         | 157297494        | kinase                  |
| Snx7          | Sorting nexin 7                                             | 13         | 15         | 4.0E-01        | 1.2        | 11         | 29         | 6.5E-08         | 2.8        | 2         | 3         | 117485281        | transporter             |
| Rab3d         | RAB3D, member RAS oncogene family                           | 12         | 15         | 2.9E-01        | 1.3        | 7          | 20         | 9.5E-06         | 2.8        | 5         | 9         | 21712731         | enzyme                  |
| Scd2          | Stearoyl-Coenzyme A desaturase 2                            | 18         | 25         | 8.0E-02        | 1.4        | 17         | 48         | 8.9E-12         | 2.8        | 4         | 19        | 44381191         | other                   |
| Enpp1         | Ectonucleotide pyrophosphatase/phosphodiesterase 1          | 6          | 10         | 6.5E-02        | 1.7        | 12         | 34         | 7.7E-09         | 2.8        | 0         | 10        | 24361400         | enzyme                  |
| <b>S100a6</b> | <b>S100 calcium binding protein A6 (calcylin)</b>           | <b>219</b> | <b>344</b> | <b>2.1E-20</b> | <b>1.6</b> | <b>256</b> | <b>704</b> | <b>2.8E-150</b> | <b>2.8</b> | <b>4</b>  | <b>3</b>  | <b>90417693</b>  | <b>transporter</b>      |
| Sh3gl1        | SH3-domain GRB2-like 1                                      | 47         | 51         | 4.6E-01        | 1.1        | 23         | 64         | 3.0E-15         | 2.8        | 6         | 17        | 56156375         | other                   |
| Ssr4          | Signal sequence receptor, delta                             | 20         | 22         | 6.0E-01        | 1.1        | 18         | 50         | 5.2E-12         | 2.7        | 8         | 20        | 71035400         | other                   |
| 2310047A01Rik | RIKEN cDNA 2310047A01 gene                                  | 38         | 38         | 8.8E-01        | 1.0        | 15         | 41         | 4.4E-10         | 2.7        | 12        | 14        | 26531266         |                         |
| G630014P10Rik | RIKEN cDNA G630014P10 gene                                  | 19         | 15         | 2.3E-01        | 0.8        | 9          | 24         | 1.6E-06         | 2.7        | 2         | 20        | 68409004         |                         |
| Jarid1b       | Jumonji, AT rich interactive domain 1B (Rbp2 like)          | 14         | 16         | 4.6E-01        | 1.2        | 8          | 21         | 7.1E-06         | 2.7        | 5         | 1         | 136527973        | transcription regulator |
| Sema3f        | Sema domain, immunoglobulin domain (Ig), short              | 9          | 15         | 5.8E-02        | 1.5        | 6          | 15         | 1.5E-04         | 2.7        | 2         | 9         | 107584065        | other                   |
| Gpnmb         | Glycoprotein (transmembrane) nmb                            | 2          | 7          | 5.9E-03        | 3.0        | 5          | 14         | 2.2E-04         | 2.7        | 0         | 6         | 49006690         | enzyme                  |
| Gria3         | GRIA3                                                       | 6          | 9          | 2.0E-01        | 1.4        | 5          | 13         | 4.8E-04         | 2.7        | 2         | 20        | 38965998         | ion channel             |
| Fkbp9         | FK506 binding protein 9                                     | 80         | 81         | 8.5E-01        | 1.0        | 56         | 151        | 3.1E-33         | 2.7        | 32        | 6         | 56829271         | enzyme                  |
| Capg          | Capping protein (actin filament), gelsolin-like             | 23         | 34         | 1.3E-02        | 1.5        | 27         | 72         | 1.3E-16         | 2.7        | 0         | 6         | 72505866         | other                   |
| Dusp6         | Dual specificity phosphatase 6                              | 38         | 37         | 8.7E-01        | 1.0        | 25         | 67         | 1.7E-15         | 2.7        | 11        | 10        | 98730033         | phosphatase             |
| Acp5          | Acid phosphatase 5, tartrate resistant                      | 31         | 104        | 4.2E-32        | 3.4        | 23         | 62         | 2.5E-14         | 2.7        | 0         | 9         | 21931559         | phosphatase             |
| Lgals1        | Lectin, galactose binding, soluble 1                        | 562        | 946        | 1.9E-68        | 1.7        | 777        | 2088       | 0.0E+00         | 2.7        | 128       | 15        | 78760526         | other                   |



|                |                                                     |            |            |                |            |            |            |                |            |          |           |                 |                         |
|----------------|-----------------------------------------------------|------------|------------|----------------|------------|------------|------------|----------------|------------|----------|-----------|-----------------|-------------------------|
| Tmem59         | Transmembrane protein 59                            | 149        | 210        | 1.3E-08        | 1.4        | 99         | 267        | 2.2E-56        | 2.7        | 50       | 4         | 106873424       | other                   |
| Ctss           | Cathepsin S                                         | 392        | 535        | 1.6E-16        | 1.4        | 390        | 1044       | 2.2E-213       | 2.7        | 1        | 3         | 95360280        | peptidase               |
| Plat           | Plasminogen activator, tissue                       | 55         | 81         | 7.8E-05        | 1.5        | 45         | 120        | 4.4E-26        | 2.7        | 1        | 8         | 23893080        | peptidase               |
| Ndufa4i2       | NADH dehydrogenase (ubiquinone) 1 alpha subco       | 14         | 19         | 1.7E-01        | 1.3        | 9          | 23         | 3.7E-06        | 2.7        | 1        | 10        | 126954033       | enzyme                  |
| Abca1          | ATP-binding cassette, sub-family A (ABC1), memb     | 145        | 199        | 3.7E-07        | 1.4        | 75         | 201        | 2.8E-42        | 2.7        | 6        | 4         | 53044112        | transporter             |
| Clic1          | Chloride intracellular channel 1                    | 79         | 104        | 1.1E-03        | 1.3        | 67         | 179        | 6.7E-38        | 2.7        | 4        | 17        | 35189834        | ion channel             |
| Rcn1           | Reticulocalbin 1                                    | 44         | 25         | 8.2E-05        | 0.6        | 20         | 53         | 2.3E-12        | 2.7        | 12       | 2         | 105227346       | other                   |
| Lgals3         | Lectin, galactose binding, soluble 3                | 4          | 10         | 1.6E-03        | 2.7        | 5          | 14         | 3.5E-04        | 2.7        | 0        | 14        | 48001330        | other                   |
| Phf13          | PHD finger protein 13                               | 7          | 12         | 3.8E-02        | 1.7        | 5          | 14         | 3.5E-04        | 2.7        | 1        | 4         | 151363827       | other                   |
| Mmp14          | Matrix metallopeptidase 14 (membrane-inserted)      | 47         | 64         | 4.5E-03        | 1.4        | 81         | 216        | 5.7E-45        | 2.7        | 0        | 14        | 55059453        | peptidase               |
| Ccl8           | Chemokine (C-C motif) ligand 8                      | 13         | 56         | 4.6E-22        | 4.2        | 54         | 142        | 3.6E-30        | 2.7        | 0        | 11        | 81930094        | other                   |
| Rab9           | RAB9, member RAS oncogene family                    | 33         | 36         | 5.0E-01        | 1.1        | 24         | 64         | 1.6E-14        | 2.7        | 13       | 20        | 102677607       | enzyme                  |
| AW228836       | Expressed sequence AW228836                         | 11         | 9          | 4.6E-01        | 0.8        | 9          | 24         | 2.8E-06        | 2.7        | 2        | 19        | 7612822         | other                   |
| 4933413N12Rik  | RIKEN cDNA 4933413N12 gene                          | 8          | 13         | 4.3E-02        | 1.6        | 5          | 13         | 5.2E-04        | 2.7        | 2        | 19        | 59371293        | other                   |
| 2410018M08Rik  | RIKEN cDNA 2410018M08 gene                          | 6          | 7          | 8.0E-01        | 1.1        | 5          | 13         | 5.2E-04        | 2.7        | 0        | 5         | 130379454       | other                   |
| Limk1          | LIM-domain containing, protein kinase               | 7          | 5          | 4.2E-01        | 0.7        | 5          | 12         | 7.7E-04        | 2.7        | 1        | 5         | 135131972       | kinase                  |
| Atp10a         | ATPase, class V, type 10A                           | 9          | 7          | 4.5E-01        | 0.8        | 5          | 12         | 7.7E-04        | 2.7        | 0        | 7         | 66084715        | transporter             |
| Dok5           | Docking protein 5                                   | 5          | 6          | 8.4E-01        | 1.0        | 5          | 12         | 7.7E-04        | 2.7        | 0        | 2         | 170705243       | other                   |
| Ramp2          | Receptor (calcitonin) activity modifying protein 2  | 39         | 39         | 8.9E-01        | 1.0        | 17         | 45         | 2.1E-10        | 2.6        | 12       | 11        | 101109296       | other                   |
| Phlda3         | Pleckstrin homology-like domain, family A, membe    | 14         | 12         | 4.4E-01        | 0.8        | 12         | 33         | 4.9E-08        | 2.6        | 2        | 1         | 137665666       | other                   |
| Smc4           | Structural maintenance of chromosomes 4             | 22         | 24         | 6.7E-01        | 1.1        | 19         | 50         | 1.7E-11        | 2.6        | 9        | 3         | 68837980        | transporter             |
| Reck           | Reversion-inducing-cysteine-rich protein with kaza  | 27         | 27         | 9.8E-01        | 1.0        | 7          | 20         | 2.7E-05        | 2.6        | 1        | 4         | 43957332        | other                   |
| Fstl3          | Follistatin-like 3                                  | 12         | 15         | 3.3E-01        | 1.2        | 12         | 32         | 7.7E-08        | 2.6        | 2        | 10        | 79245014        | other                   |
| Luc7l          | Luc7l                                               | 80         | 87         | 3.5E-01        | 1.1        | 69         | 181        | 7.7E-37        | 2.6        | 22       | 17        | 26409366        | other                   |
| Tnfrsf10b      | Tnfrsf10b                                           | 19         | 21         | 5.8E-01        | 1.1        | 12         | 32         | 1.1E-07        | 2.6        | 1        | 14        | 70184030        | transmembrane receptor  |
| 3110045G13Rik  | RIKEN cDNA 3110045G13 gene                          | 10         | 10         | 9.7E-01        | 1.0        | 9          | 23         | 6.4E-06        | 2.6        | 2        | 3         | 87553018        | other                   |
| Rgs16          | Regulator of G-protein signaling 16                 | 4          | 9          | 6.9E-03        | 2.3        | 9          | 22         | 9.3E-06        | 2.6        | 0        | 1         | 155592542       | other                   |
| Ypel2          | Yppee-like 2 (Drosophila)                           | 20         | 17         | 5.6E-01        | 0.9        | 9          | 22         | 9.3E-06        | 2.6        | 10       | 20        | 95965437        | other                   |
| <b>Aldh1a2</b> | <b>Aldehyde dehydrogenase family 1, subfamily A</b> | <b>24</b>  | <b>24</b>  | <b>9.9E-01</b> | <b>1.0</b> | <b>41</b>  | <b>107</b> | <b>2.8E-22</b> | <b>2.6</b> | <b>1</b> | <b>9</b>  | <b>71143914</b> | <b>enzyme</b>           |
| Sorbs3         | Sorbin and SH3 domain containing 3                  | 20         | 23         | 4.4E-01        | 1.1        | 14         | 35         | 2.7E-08        | 2.6        | 4        | 14        | 70580425        | other                   |
| Sh3tc1         | SH3 domain and tetratricopeptide repeats 1          | 8          | 8          | 9.1E-01        | 1.0        | 5          | 14         | 5.7E-04        | 2.6        | 0        | 5         | 36042933        | other                   |
| Loxl1          | Lysyl oxidase-like 1                                | 90         | 123        | 7.0E-05        | 1.4        | 70         | 181        | 2.2E-36        | 2.6        | 2        | 9         | 58136501        | enzyme                  |
| Khdrbs1        | KH domain containing, RNA binding, signal transd    | 21         | 20         | 9.4E-01        | 1.0        | 10         | 26         | 1.5E-06        | 2.6        | 4        | 8         | 105058659       | transcription regulator |
| Rexo1          | REX1, RNA exonuclease 1 homolog (S. cerevisiae)     | 14         | 17         | 3.8E-01        | 1.2        | 7          | 19         | 4.2E-05        | 2.6        | 4        | 13        | 69493168        | transcription regulator |
| 4930431B09Rik  | RIKEN cDNA 4930431B09 gene                          | 7          | 8          | 6.1E-01        | 1.1        | 5          | 13         | 8.3E-04        | 2.6        | 1        | 3         | 100275771       | other                   |
| <b>Thy1</b>    | <b>Thymus cell antigen 1, theta</b>                 | <b>66</b>  | <b>51</b>  | <b>2.3E-02</b> | <b>0.8</b> | <b>29</b>  | <b>75</b>  | <b>7.0E-16</b> | <b>2.6</b> | <b>1</b> | <b>9</b>  | <b>43856585</b> | <b>other</b>            |
| Foxn2          | Forkhead box N2                                     | 47         | 37         | 6.2E-02        | 0.8        | 22         | 56         | 2.5E-12        | 2.6        | 3        | 17        | 88889290        | transcription regulator |
| Ptk2b          | PTK2 protein tyrosine kinase 2 beta                 | 12         | 15         | 2.9E-01        | 1.3        | 7          | 18         | 9.0E-05        | 2.6        | 2        | 14        | 66772169        | kinase                  |
| C79267         | Expressed sequence C79267                           | 16         | 18         | 6.4E-01        | 1.1        | 9          | 23         | 6.9E-06        | 2.6        | 2        | 4         | 139176065       | other                   |
| Suv39h1        | Suppressor of variegation 3-9 homolog 1 (Drosop     | 8          | 13         | 6.5E-02        | 1.6        | 7          | 17         | 1.3E-04        | 2.6        | 2        | 20        | 7638639         | enzyme                  |
| Dap            | Death-associated protein                            | 25         | 53         | 1.6E-08        | 2.1        | 39         | 100        | 1.9E-20        | 2.6        | 3        | 15        | 31203655        | other                   |
| Acbd3          | Acyl-Coenzyme A binding domain containing 3         | 59         | 60         | 7.7E-01        | 1.0        | 36         | 93         | 3.3E-19        | 2.6        | 15       | 1         | 182684173       | other                   |
| Gramd1a        | GRAM domain containing 1A                           | 29         | 43         | 4.9E-03        | 1.5        | 23         | 59         | 9.8E-13        | 2.6        | 9        | 7         | 31915145        | other                   |
| Mxra7          | Matrix-remodelling associated 7                     | 22         | 32         | 1.1E-02        | 1.5        | 23         | 60         | 1.1E-12        | 2.5        | 2        | 11        | 116667979       | other                   |
| Srrm1          | Serine/arginine repetitive matrix 1                 | 18         | 16         | 5.8E-01        | 0.9        | 8          | 20         | 3.1E-05        | 2.5        | 7        | 16        | 9104636         | other                   |
| Cd209f         | CD209f antigen                                      | 12         | 10         | 5.6E-01        | 0.9        | 6          | 15         | 2.8E-04        | 2.5        | 8        | 8         | 4102849         | other                   |
| Dpysl3         | Dihydropyrimidinase-like 3                          | 38         | 61         | 4.3E-05        | 1.6        | 35         | 89         | 3.4E-18        | 2.5        | 7        | 18        | 43480873        | enzyme                  |
| Ndfip1         | Nedd4 family interacting protein 1                  | 82         | 78         | 5.6E-01        | 1.0        | 34         | 85         | 2.0E-17        | 2.5        | 37       | 18        | 38624231        | other                   |
| Dpep2          | Dipeptidase 2                                       | 7          | 12         | 3.8E-02        | 1.7        | 10         | 25         | 5.1E-06        | 2.5        | 0        | 8         | 108509140       | peptidase               |
| Faim           | Fas apoptotic inhibitory molecule                   | 7          | 10         | 1.2E-01        | 1.5        | 7          | 19         | 6.6E-05        | 2.5        | 2        | 9         | 98893087        | other                   |
| Tyrobp         | TYRO protein tyrosine kinase binding protein        | 61         | 94         | 2.5E-06        | 1.5        | 61         | 154        | 4.6E-30        | 2.5        | 1        | 7         | 31198857        | other                   |
| <b>Anxa1</b>   | <b>Annexin A1</b>                                   | <b>255</b> | <b>229</b> | <b>4.6E-02</b> | <b>0.9</b> | <b>184</b> | <b>463</b> | <b>2.7E-86</b> | <b>2.5</b> | <b>5</b> | <b>19</b> | <b>20448139</b> | <b>other</b>            |
| Ugt1a7c        | UDP glucuronosyltransferase 1 family, polypeptide   | 41         | 48         | 2.0E-01        | 1.2        | 31         | 77         | 1.1E-15        | 2.5        | 0        | 1         | 90116577        | other                   |
| Col5a3         | Collagen, type V, alpha 3                           | 7          | 24         | 4.3E-09        | 3.6        | 22         | 55         | 1.0E-11        | 2.5        | 0        | 9         | 20574701        | other                   |
| Cnot2          | CCR4-NOT transcription complex, subunit 2           | 41         | 44         | 6.3E-01        | 1.1        | 19         | 49         | 1.7E-10        | 2.5        | 21       | 10        | 115922482       | transcription regulator |
| Tmem173        | Transmembrane protein 173                           | 9          | 8          | 8.5E-01        | 0.9        | 5          | 13         | 9.0E-04        | 2.5        | 18       | 35894153  | other           |                         |
| Rpl36a         | Ribosomal protein L36a                              | 251        | 300        | 3.3E-04        | 1.2        | 159        | 396        | 1.3E-73        | 2.5        | 119      | 3         | 145541983       | other                   |
| Prdx4          | Peroxisiredoxin 4                                   | 57         | 97         | 1.3E-08        | 1.7        | 90         | 225        | 1.3E-42        | 2.5        | 20       | 21        | 151758462       | enzyme                  |
| Pld3           | Phospholipase D family, member 3                    | 13         | 23         | 3.6E-03        | 1.7        | 17         | 41         | 4.3E-09        | 2.5        | 6        | 7         | 28317099        | enzyme                  |
| Praf2          | PRA1 domain family 2                                | 22         | 33         | 1.1E-02        | 1.5        | 19         | 48         | 3.7E-10        | 2.5        | 2        | 20        | 7308101         | other                   |
| Ssr3           | Signal sequence receptor, gamma                     | 216        | 298        | 1.6E-10        | 1.4        | 250        | 619        | 3.1E-112       | 2.5        | 83       | 3         | 65184016        | other                   |
| Tubb5          | Tubulin, beta 5                                     | 133        | 144        | 2.4E-01        | 1.1        | 88         | 218        | 1.3E-40        | 2.5        | 60       | 4         | 24166594        | other                   |
| Rcc2           | Regulator of chromosome condensation 2              | 18         | 22         | 3.0E-01        | 1.2        | 14         | 34         | 1.1E-07        | 2.5        | 3        | 4         | 140277390       | other                   |
| Trem2          | Triggering receptor expressed on myeloid cells 2    | 7          | 21         | 2.8E-06        | 2.9        | 14         | 34         | 1.6E-07        | 2.5        | 0        | 17        | 48491410        | transmembrane receptor  |
| Rsbn1l         | Rsbn1l                                              | 10         | 17         | 1.7E-02        | 1.7        | 7          | 18         | 1.0E-04        | 2.5        | 4        | 5         | 20401202        | other                   |
| Cdk9           | Cyclin-dependent kinase 9 (CDC2-related kinase)     | 22         | 29         | 1.2E-01        | 1.3        | 20         | 50         | 2.0E-10        | 2.5        | 3        | 4         | 155588917       | kinase                  |
| Anpep          | Alanyl (membrane) aminopeptidase                    | 10         | 19         | 3.5E-03        | 1.9        | 16         | 39         | 2.0E-08        | 2.5        | 0        | 7         | 86966920        | peptidase               |
| Tmsb10         | Thymosin, beta 10                                   | 374        | 475        | 1.0E-09        | 1.3        | 289        | 712        | 1.5E-127       | 2.5        | 17       | 18        | 75926814        | other                   |
| Ctla2a         | Cytotoxic T lymphocyte-associated protein 2 alpha   | 112        | 132        | 2.1E-02        | 1.2        | 77         | 190        | 2.0E-35        | 2.5        | 6        | 13        | 61036160        | other                   |

|                |                                                       |            |            |                |            |            |            |                |            |          |           |                  |                         |
|----------------|-------------------------------------------------------|------------|------------|----------------|------------|------------|------------|----------------|------------|----------|-----------|------------------|-------------------------|
| F630110N24Rik  | RIKEN cDNA F630110N24 gene                            | 11         | 11         | 9.4E-01        | 1.0        | 11         | 27         | 2.9E-06        | 2.5        | 4        | 10        | 80828939         |                         |
| Fkbp2          | FK506 binding protein 2                               | 19         | 22         | 3.9E-01        | 1.2        | 18         | 43         | 3.6E-09        | 2.5        | 7        | 19        | 7052228          | enzyme                  |
| Efnb2          | Ephrin B2                                             | 10         | 12         | 3.9E-01        | 1.2        | 11         | 26         | 4.3E-06        | 2.5        | 3        | 8         | 8617537          | other                   |
| Zfp87          | Zinc finger protein 87                                | 13         | 14         | 6.3E-01        | 1.1        | 9          | 23         | 1.8E-05        | 2.5        | 5        | 13        | 67622037         |                         |
| Dusp5          | Dual specificity phosphatase 5                        | 100        | 96         | 6.7E-01        | 1.0        | 59         | 144        | 9.5E-27        | 2.4        | 5        | 19        | 53616810         | phosphatase             |
| Olr1           | Oxidized low density lipoprotein (lectin-like) recept | 40         | 43         | 6.5E-01        | 1.1        | 27         | 67         | 3.0E-13        | 2.4        |          | 6         | 129435389        | transmembrane receptor  |
| Mm.430787      | CDNA clone IMAGE:6820538                              | 5          | 8          | 5.1E-02        | 1.8        | 9          | 22         | 2.6E-05        | 2.4        | 1        | 13        | 100191732        |                         |
| Ece1           | Endothelin converting enzyme 1                        | 178        | 203        | 2.6E-02        | 1.1        | 116        | 281        | 2.4E-50        | 2.4        | 15       | 4         | 137521037        | peptidase               |
| Rnf126         | Ring finger protein 126                               | 19         | 16         | 5.6E-01        | 0.9        | 10         | 25         | 9.0E-06        | 2.4        | 9        | 10        | 79221495         | other                   |
| Akap13         | A kinase (PRKA) anchor protein 13                     | 12         | 19         | 1.4E-02        | 1.7        | 9          | 21         | 3.8E-05        | 2.4        | 2        | 7         | 82832100         | other                   |
| Golm1          | Golgi membrane protein 1                              | 13         | 10         | 3.4E-01        | 0.8        | 13         | 32         | 5.5E-07        | 2.4        | 4        | 13        | 59736445         | other                   |
| Svep1          | Sushi, von Willebrand factor type A, EGF and pen      | 41         | 68         | 5.4E-06        | 1.7        | 51         | 124        | 1.0E-22        | 2.4        | 1        | 20        | 137869909        | other                   |
| Ugcgl1         | UDP-glucose ceramide glucosyltransferase-like 1       | 24         | 34         | 2.0E-02        | 1.4        | 26         | 62         | 4.1E-12        | 2.4        | 9        | 1         | 36200403         | enzyme                  |
| Cd44           | CD44 antigen                                          | 244        | 286        | 1.7E-03        | 1.2        | 203        | 489        | 1.2E-84        | 2.4        | 14       | 2         | 102651980        | other                   |
| Ssr2           | Signal sequence receptor, beta                        | 39         | 37         | 7.9E-01        | 1.0        | 41         | 99         | 2.3E-18        | 2.4        | 11       | 3         | 88391826         | other                   |
| Sid2           | SID1 transmembrane family, member 2                   | 42         | 48         | 2.6E-01        | 1.1        | 34         | 82         | 1.6E-15        | 2.4        | 21       | 9         | 45746016         | other                   |
| Ptpra          | Protein tyrosine phosphatase, receptor type, A        | 37         | 41         | 3.9E-01        | 1.1        | 24         | 57         | 3.4E-11        | 2.4        | 12       | 2         | 130379759        | phosphatase             |
| Aebp1          | AE binding protein 1                                  | 12         | 19         | 2.9E-02        | 1.6        | 23         | 54         | 9.6E-11        | 2.4        | 1        | 15        | 62564871         | peptidase               |
| 3110001A13Rik  | RIKEN cDNA 3110001A13 gene                            | 35         | 48         | 1.0E-02        | 1.4        | 20         | 49         | 7.7E-10        | 2.4        | 1        | 2         | 3698821          |                         |
| Bcl6b          | B-cell CLL/lymphoma 6, member B                       | 19         | 23         | 2.2E-01        | 1.2        | 12         | 30         | 1.7E-06        | 2.4        | 3        | 11        | 70037745         | transcription regulator |
| Rps6ka4        | Ribosomal protein S6 kinase, polypeptide 4            | 12         | 11         | 8.2E-01        | 0.9        | 8          | 19         | 1.2E-04        | 2.4        | 4        | 19        | 6903696          | kinase                  |
| Tnfsf14        | Tnfsf14                                               | 8          | 9          | 4.1E-01        | 1.2        | 7          | 17         | 3.4E-04        | 2.4        |          | 17        | 57328921         | cytokine                |
| Ppib           | Peptidylprolyl isomerase B                            | 145        | 98         | 3.5E-07        | 0.7        | 94         | 224        | 2.4E-39        | 2.4        | 25       | 9         | 65914436         | enzyme                  |
| Ryk            | Receptor-like tyrosine kinase                         | 41         | 45         | 3.5E-01        | 1.1        | 43         | 102        | 9.1E-19        | 2.4        | 20       | 9         | 102808396        | kinase                  |
| BC023892       | CDNA sequence BC023892                                | 27         | 35         | 6.6E-02        | 1.3        | 30         | 73         | 7.0E-14        | 2.4        | 11       | 9         | 85214960         | other                   |
| 9130005N14Rik  | RIKEN cDNA 9130005N14 gene                            | 21         | 29         | 7.0E-02        | 1.3        | 17         | 40         | 3.6E-08        | 2.4        | 2        | 5         | 65432878         |                         |
| 9430020K01Rik  | 9430020K01Rik                                         | 24         | 31         | 1.2E-01        | 1.3        | 14         | 32         | 5.8E-07        | 2.4        | 7        | 18        | 4682641          |                         |
| Ptplad2        | Protein tyrosine phosphatase-like A domain conta      | 10         | 14         | 1.1E-01        | 1.4        | 7          | 16         | 5.0E-04        | 2.4        | 0        | 4         | 88058833         | other                   |
| Creb3l2        | CAMP responsive element binding protein 3-like 2      | 53         | 95         | 7.0E-10        | 1.8        | 75         | 180        | 1.4E-31        | 2.4        | 10       | 6         | 37277633         | other                   |
| Bmp4           | Bone morphogenetic protein 4                          | 50         | 37         | 2.2E-02        | 0.8        | 17         | 41         | 2.7E-08        | 2.4        | 1        | 14        | 47003612         | growth factor           |
| 2610204M08Rik  | RIKEN cDNA 2610204M08 gene                            | 8          | 14         | 2.5E-02        | 1.7        | 9          | 20         | 8.4E-05        | 2.4        | 4        | 12        | 113853701        |                         |
| Cbx6           | Chromobox homolog 6                                   | 15         | 9          | 4.6E-02        | 0.6        | 7          | 18         | 2.5E-04        | 2.4        | 5        | 15        | 79616848         | other                   |
| Serpinh1       | Serine (or cysteine) peptidase inhibitor, clade H, n  | 390        | 368        | 1.7E-01        | 0.9        | 407        | 963        | 2.0E-160       | 2.4        | 102      | 7         | 106494072        | other                   |
| Ptn            | Pleiotrophin                                          | 29         | 21         | 5.7E-02        | 0.7        | 40         | 94         | 4.5E-17        | 2.4        | 0        | 6         | 36665032         | growth factor           |
| Ankrd13a       | Ankrd13a                                              | 16         | 20         | 2.1E-01        | 1.3        | 14         | 33         | 6.1E-07        | 2.4        | 3        | 5         | 115241370        | other                   |
| <b>Slfm2</b>   | <b>Schlafen 2</b>                                     | <b>211</b> | <b>333</b> | <b>3.8E-20</b> | <b>1.6</b> | <b>158</b> | <b>372</b> | <b>7.3E-63</b> | <b>2.4</b> | <b>0</b> | <b>11</b> | <b>82883980</b>  |                         |
| Plixnd1        | Plexin D1                                             | 37         | 39         | 7.4E-01        | 1.0        | 19         | 44         | 9.8E-09        | 2.4        | 13       | 6         | 115905254        | transmembrane receptor  |
| Tnrc5          | Trinucleotide repeat containing 5                     | 7          | 15         | 1.7E-03        | 2.2        | 10         | 24         | 2.1E-05        | 2.4        | 2        | 17        | 46873042         | other                   |
| Pltp           | Phospholipid transfer protein                         | 68         | 149        | 1.9E-23        | 2.2        | 68         | 160        | 1.4E-27        | 2.4        | 1        | 2         | 164665235        | other                   |
| Npl            | N-acetylneuraminatase pyruvate lyase                  | 10         | 13         | 2.4E-01        | 1.3        | 11         | 26         | 1.1E-05        | 2.4        | 0        | 1         | 155350656        | enzyme                  |
| Gramd1b        | GRAM domain containing 1B                             | 15         | 20         | 1.9E-01        | 1.3        | 8          | 19         | 1.8E-04        | 2.4        | 6        | 9         | 40100869         | other                   |
| Mex3b          | Mex3 homolog B (C. elegans)                           | 14         | 14         | 8.9E-01        | 1.0        | 7          | 16         | 5.3E-04        | 2.4        | 0        | 7         | 90019919         | kinase                  |
| Pmp22          | Peripheral myelin protein                             | 304        | 413        | 7.8E-13        | 1.4        | 222        | 520        | 1.3E-85        | 2.3        | 8        | 11        | 62972447         | other                   |
| Tram1          | Translocating chain-associating membrane protein      | 68         | 103        | 2.2E-06        | 1.5        | 101        | 235        | 1.1E-39        | 2.3        | 14       | 1         | 13555017         | other                   |
| Selp           | Selectin, platelet                                    | 288        | 242        | 4.9E-04        | 0.8        | 109        | 255        | 2.4E-42        | 2.3        | 1        | 1         | 166079689        | other                   |
| Smchd1         | SMC hinge domain containing 1                         | 22         | 32         | 1.7E-02        | 1.5        | 11         | 25         | 2.2E-05        | 2.3        | 9        | 17        | 71694364         | other                   |
| Pls3           | Plastin 3 (T-isoform)                                 | 19         | 15         | 2.3E-01        | 0.8        | 9          | 22         | 6.4E-05        | 2.3        | 8        | 20        | 73031269         | other                   |
| Dkk3           | Dickkopf homolog 3 (Xenopus laevis)                   | 9          | 25         | 4.9E-07        | 2.8        | 19         | 45         | 1.1E-08        | 2.3        | 1        | 7         | 119259668        | other                   |
| Prpsap1        | Phosphoribosyl pyrophosphate synthetase-associ        | 16         | 29         | 9.1E-04        | 1.8        | 18         | 41         | 4.4E-08        | 2.3        | 5        | 11        | 116332483        | other                   |
| Ctdspl         | Ctdspl                                                | 10         | 19         | 3.5E-03        | 1.9        | 10         | 24         | 3.2E-05        | 2.3        | 2        | 9         | 118949892        | other                   |
| Sele           | Selectin, endothelial cell                            | 63         | 57         | 4.1E-01        | 0.9        | 32         | 74         | 3.1E-13        | 2.3        | 0        | 1         | 165987754        | other                   |
| Sh2b2          | SH2B adaptor protein 2                                | 16         | 15         | 9.1E-01        | 1.0        | 10         | 23         | 4.6E-05        | 2.3        |          | 5         | 136694218        | other                   |
| Fyb            | FYN binding protein                                   | 14         | 21         | 4.4E-02        | 1.5        | 11         | 24         | 3.4E-05        | 2.3        | 0        | 15        | 6613214          | other                   |
| Ddost          | Dolichyl-di-phosphooligosaccharide-protein glycot     | 81         | 83         | 6.9E-01        | 1.0        | 79         | 182        | 6.6E-30        | 2.3        | 38       | 4         | 137867978        | enzyme                  |
| Dusp16         | Dual specificity phosphatase 16                       | 21         | 32         | 5.7E-03        | 1.5        | 18         | 41         | 6.9E-08        | 2.3        | 10       | 6         | 134665788        | phosphatase             |
| Ly96           | Lymphocyte antigen 96                                 | 29         | 32         | 5.3E-01        | 1.1        | 15         | 35         | 5.4E-07        | 2.3        | 3        | 1         | 16690965         | other                   |
| lpmk           | Inositol polyphosphate multikinase                    | 30         | 26         | 3.5E-01        | 0.9        | 11         | 25         | 2.4E-05        | 2.3        | 7        | 20        | 20810313         | kinase                  |
| 1200015N20Rik  | RIKEN cDNA 1200015N20 gene                            | 6          | 21         | 3.9E-07        | 3.2        | 9          | 20         | 2.0E-04        | 2.3        | 2        | 10        | 70021150         |                         |
| Zfp746         | Zinc finger protein 746                               | 12         | 11         | 6.1E-01        | 0.9        | 8          | 18         | 4.0E-04        | 2.3        | 4        | 6         | 48012568         |                         |
| Ccl6           | Chemokine (C-C motif) ligand 6                        | 72         | 81         | 1.7E-01        | 1.1        | 77         | 175        | 1.6E-28        | 2.3        | 0        | 11        | 83401439         |                         |
| Mfap4          | Microfibrillar-associated protein 4                   | 32         | 116        | 3.0E-38        | 3.7        | 51         | 115        | 2.0E-19        | 2.3        | 0        | 11        | 61302126         | other                   |
| Surf4          | Surfeit gene 4                                        | 57         | 94         | 6.7E-08        | 1.7        | 77         | 175        | 1.6E-28        | 2.3        | 28       | 2         | 26775866         | other                   |
| Rasa1          | Rasa1                                                 | 53         | 65         | 4.2E-02        | 1.2        | 41         | 94         | 6.9E-16        | 2.3        | 24       | 13        | 85354946         | transporter             |
| A430110N23Rik  | RIKEN cDNA A430110N23 gene                            | 16         | 22         | 7.0E-02        | 1.4        | 12         | 26         | 1.8E-05        | 2.3        | 0        | 7         | 4896315          |                         |
| BC023882       | CDNA sequence BC023882                                | 13         | 17         | 1.5E-01        | 1.3        | 11         | 25         | 3.5E-05        | 2.3        | 2        | 5         | 34506223         | other                   |
| <b>Tspan31</b> | <b>Tetraspanin 31</b>                                 | <b>14</b>  | <b>20</b>  | <b>1.0E-01</b> | <b>1.4</b> | <b>11</b>  | <b>26</b>  | <b>2.5E-05</b> | <b>2.3</b> | <b>5</b> | <b>10</b> | <b>126505413</b> | <b>other</b>            |
| Setd1a         | SET domain containing 1A                              | 16         | 22         | 9.1E-02        | 1.4        | 11         | 24         | 5.1E-05        | 2.3        | 7        | 7         | 134943392        | ion channel             |
| H19            | H19 fetal liver mRNA                                  | 18         | 15         | 4.2E-01        | 0.8        | 8          | 18         | 4.1E-04        | 2.3        | 2        | 7         | 149761514        | other                   |
| Mapk3          | Mitogen activated protein kinase 3                    | 44         | 68         | 4.5E-05        | 1.6        | 37         | 83         | 4.2E-14        | 2.3        | 17       | 7         | 133909202        | kinase                  |

|               |                                                      |            |            |                |            |           |            |                |            |           |           |                  |                                |
|---------------|------------------------------------------------------|------------|------------|----------------|------------|-----------|------------|----------------|------------|-----------|-----------|------------------|--------------------------------|
| Aprt          | Adenine phosphoribosyl transferase                   | 28         | 42         | 2.3E-03        | 1.5        | 34        | 76         | 6.1E-13        | 2.3        | 9         | 8         | 125098920        | enzyme                         |
| <b>Cdk4</b>   | <b>Cyclin-dependent kinase 4</b>                     | <b>29</b>  | <b>33</b>  | <b>3.8E-01</b> | <b>1.1</b> | <b>28</b> | <b>64</b>  | <b>3.3E-11</b> | <b>2.3</b> | <b>15</b> | <b>10</b> | <b>126502276</b> | <b>kinase</b>                  |
| Mpz1l         | Myelin protein zero-like 1                           | 14         | 17         | 3.1E-01        | 1.2        | 14        | 32         | 3.3E-06        | 2.3        | 5         | 1         | 167522678        | other                          |
| Rab11fp1      | RAB11 family interacting protein 1 (class I)         | 15         | 17         | 4.8E-01        | 1.1        | 13        | 30         | 6.6E-06        | 2.3        | 0         | 8         | 28251348         | other                          |
| Tm9sf1        | Transmembrane 9 superfamily member 1                 | 42         | 44         | 7.7E-01        | 1.0        | 36        | 80         | 1.7E-13        | 2.2        | 21        | 14        | 56255013         | transporter                    |
| <b>Tgfb2</b>  | <b>Transforming growth factor, beta 2</b>            | <b>35</b>  | <b>41</b>  | <b>1.8E-01</b> | <b>1.2</b> | <b>25</b> | <b>55</b>  | <b>1.0E-09</b> | <b>2.2</b> | <b>5</b>  | <b>1</b>  | <b>188448266</b> | <b>growth factor</b>           |
| Acvr1         | Activin A receptor, type 1                           | 27         | 27         | 9.0E-01        | 1.0        | 23        | 51         | 3.9E-09        | 2.2        | 5         | 2         | 58299058         | kinase                         |
| Hspc171       | HSPC171 protein                                      | 22         | 28         | 1.1E-01        | 1.3        | 21        | 47         | 1.5E-08        | 2.2        | 11        | 8         | 107852871        |                                |
| Ikbe          | Inhibitor of kappaB kinase epsilon                   | 13         | 12         | 6.1E-01        | 0.9        | 12        | 28         | 1.3E-05        | 2.2        | 0         | 1         | 133151204        | kinase                         |
| Arfgap3       | ADP-ribosylation factor GTPase activating protein    | 13         | 23         | 2.4E-03        | 1.8        | 12        | 26         | 2.6E-05        | 2.2        | 4         | 15        | 83130974         | transporter                    |
| <b>Fgfr3</b>  | <b>Fibroblast growth factor receptor 3</b>           | <b>9</b>   | <b>13</b>  | <b>1.5E-01</b> | <b>1.4</b> | <b>9</b>  | <b>19</b>  | <b>3.0E-04</b> | <b>2.2</b> | <b>3</b>  | <b>5</b>  | <b>34079628</b>  | <b>kinase</b>                  |
| Prg4          | Prg4                                                 | 102        | 198        | 4.0E-23        | 1.9        | 169       | 378        | 1.9E-57        | 2.2        | 1         | 1         | 152298401        | other                          |
| Itn2c         | Integral membrane protein 2C                         | 226        | 245        | 1.2E-01        | 1.1        | 143       | 321        | 5.0E-49        | 2.2        | 39        | 1         | 87805165         | other                          |
| P4ha1         | Procollagen-proline, 2-oxoglutarate 4-dioxygenase    | 46         | 68         | 2.4E-04        | 1.5        | 47        | 106        | 3.1E-17        | 2.2        | 6         | 10        | 58834223         | enzyme                         |
| Stk24         | Stk24                                                | 28         | 37         | 4.7E-02        | 1.3        | 23        | 52         | 2.8E-09        | 2.2        | 11        | 14        | 121685896        | kinase                         |
| Mm.89591      | 10 days neonate cerebellum cDNA, RIKEN full-ler      | 13         | 23         | 4.4E-03        | 1.7        | 8         | 18         | 4.3E-04        | 2.2        | 2         | 14        | 78959233         |                                |
| Zfand2a       | Zinc finger, AN1-type domain 2A                      | 108        | 88         | 1.9E-02        | 0.8        | 60        | 133        | 4.4E-21        | 2.2        | 9         | 5         | 139947304        | other                          |
| Tusc3         | Tumor suppressor candidate 3                         | 30         | 29         | 9.3E-01        | 1.0        | 19        | 41         | 1.7E-07        | 2.2        | 10        | 8         | 40250468         | enzyme                         |
| Pcdh19        | Pcdh19                                               | 19         | 22         | 3.8E-01        | 1.2        | 16        | 36         | 9.0E-07        | 2.2        | 1         | 20        | 130118483        | other                          |
| Rnf111        | Ring finger 111                                      | 35         | 25         | 3.0E-02        | 0.7        | 15        | 34         | 1.8E-06        | 2.2        | 9         | 9         | 70273885         | enzyme                         |
| Pik3c2a       | Pik3c2a                                              | 28         | 28         | 9.5E-01        | 1.0        | 15        | 33         | 2.5E-06        | 2.2        | 9         | 7         | 123480936        | kinase                         |
| Neu1          | Neuraminidase 1                                      | 18         | 24         | 9.0E-02        | 1.3        | 10        | 21         | 1.5E-04        | 2.2        | 4         | 17        | 35071743         | enzyme                         |
| Csrp2         | Cysteine and glycine-rich protein 2                  | 35         | 41         | 2.3E-01        | 1.2        | 35        | 78         | 7.3E-13        | 2.2        | 9         | 10        | 110376332        | other                          |
| Tmem11        | Transmembrane protein 11                             | 34         | 52         | 4.2E-04        | 1.5        | 23        | 51         | 6.0E-09        | 2.2        | 13        | 11        | 60678183         | -protein coupled receptor      |
| Seleplg       | Selectin, platelet (p-selectin) ligand               | 16         | 26         | 4.6E-03        | 1.7        | 17        | 37         | 9.3E-07        | 2.2        | 0         | 5         | 114268732        | other                          |
| <b>Aggf1</b>  | <b>Angiogenic factor with G patch and FHA doma</b>   | <b>46</b>  | <b>45</b>  | <b>8.8E-01</b> | <b>1.0</b> | <b>29</b> | <b>64</b>  | <b>8.1E-11</b> | <b>2.2</b> | <b>13</b> | <b>14</b> | <b>49782600</b>  | <b>other</b>                   |
| Mmrn1         | Multimerin 1                                         | 18         | 25         | 6.2E-02        | 1.4        | 15        | 33         | 3.7E-06        | 2.2        | 0         | 6         | 60939242         | other                          |
| Emilin1       | Elastin microfibril interfacer 1                     | 11         | 17         | 5.4E-02        | 1.5        | 14        | 32         | 5.1E-06        | 2.2        | 0         | 5         | 31223238         | other                          |
| 2810026P18Rik | RIKEN cDNA 2810026P18 gene                           | 38         | 30         | 8.8E-02        | 0.8        | 20        | 45         | 6.5E-08        | 2.2        | 7         | 9         | 88970467         |                                |
| Stch          | Stress 70 protein chaperone, microsome-associat      | 43         | 43         | 9.7E-01        | 1.0        | 30        | 66         | 8.9E-11        | 2.2        | 6         | 16        | 75755802         | other                          |
| Med15         | Mediator complex subunit 15                          | 17         | 21         | 2.6E-01        | 1.2        | 14        | 31         | 7.6E-06        | 2.2        | 4         | 16        | 17651619         | transcription regulator        |
| 3321401G04Rik | RIKEN cDNA 3321401G04 gene                           | 12         | 27         | 2.1E-05        | 2.2        | 11        | 24         | 8.1E-05        | 2.2        | 2         | 6         | 42620178         |                                |
| Dot1l         | DOT1-like, histone H3 methyltransferase (S. cerev    | 25         | 30         | 2.2E-01        | 1.2        | 22        | 49         | 2.6E-08        | 2.2        | 12        | 10        | 80257029         | phosphatase                    |
| <b>Cdh5</b>   | <b>Cadherin 5</b>                                    | <b>125</b> | <b>112</b> | <b>1.7E-01</b> | <b>0.9</b> | <b>51</b> | <b>109</b> | <b>9.7E-17</b> | <b>2.2</b> | <b>37</b> | <b>8</b>  | <b>106668349</b> | <b>other</b>                   |
| Dpysl2        | Dihydropyrimidinase-like 2                           | 35         | 27         | 9.1E-02        | 0.8        | 19        | 41         | 3.9E-07        | 2.2        | 5         | 14        | 67421873         | enzyme                         |
| Gnpda1        | Glucosamine-6-phosphate deaminase 1                  | 17         | 24         | 6.1E-02        | 1.4        | 15        | 32         | 7.8E-06        | 2.2        | 7         | 18        | 38487598         | enzyme                         |
| Thex1         | Thex1                                                | 28         | 23         | 2.5E-01        | 0.8        | 14        | 30         | 1.6E-05        | 2.2        | 7         | 8         | 36531831         | enzyme                         |
| Tspan6        | Tetraspanin 6                                        | 13         | 13         | 9.2E-01        | 1.0        | 12        | 26         | 6.0E-05        | 2.2        | 2         | 20        | 130425974        | other                          |
| Hsd3b7        | Hydroxy-delta-5-steroid dehydrogenase, 3 beta- a     | 11         | 27         | 1.5E-06        | 2.5        | 10        | 21         | 2.3E-04        | 2.2        | 4         | 7         | 134947212        | enzyme                         |
| Epha2         | Eph receptor A2                                      | 20         | 20         | 9.7E-01        | 1.0        | 10        | 21         | 2.3E-04        | 2.2        | 1         | 4         | 140884662        | kinase                         |
| Slc7a7        | Solute carrier family 7 (cationic amino acid transp  | 16         | 18         | 4.3E-01        | 1.2        | 8         | 17         | 9.3E-04        | 2.2        | 1         | 14        | 54989318         | transporter                    |
| Rpn2          | Ribophorin II                                        | 117        | 160        | 7.0E-06        | 1.4        | 134       | 289        | 4.1E-41        | 2.2        | 45        | 2         | 157151648        | enzyme                         |
| Matn2         | Matrilin 2                                           | 83         | 94         | 1.5E-01        | 1.1        | 71        | 154        | 1.2E-22        | 2.2        | 2         | 15        | 34365918         | other                          |
| Copa          | Coatomer protein complex subunit alpha               | 63         | 67         | 5.3E-01        | 1.1        | 52        | 112        | 7.7E-17        | 2.2        | 26        | 1         | 174051989        | transporter                    |
| Zfp318        | Zfp318                                               | 35         | 42         | 1.2E-01        | 1.2        | 50        | 107        | 2.8E-16        | 2.2        | 10        | 17        | 46541125         |                                |
| Rassf1        | Ras association (RalGDS/AF-6) domain family 1        | 61         | 57         | 5.5E-01        | 0.9        | 32        | 68         | 7.0E-11        | 2.2        | 8         | 9         | 107464216        | other                          |
| Tpm4          | Tropomyosin 4                                        | 190        | 227        | 1.5E-03        | 1.2        | 159       | 339        | 1.8E-47        | 2.1        | 9         | 8         | 74676337         | other                          |
| Cndp2         | CNDP dipeptidase 2 (metallopeptidase M20 family      | 99         | 180        | 5.0E-18        | 1.8        | 77        | 165        | 7.3E-24        | 2.1        | 8         | 18        | 84836916         | peptidase                      |
| Trip1         | TNFAIP3 interacting protein 1                        | 59         | 100        | 6.3E-09        | 1.7        | 45        | 95         | 1.5E-14        | 2.1        | 11        | 11        | 54724431         | other                          |
| M6pr          | Mannose-6-phosphate receptor, cation dependent       | 71         | 101        | 5.6E-05        | 1.4        | 58        | 123        | 3.2E-18        | 2.1        | 22        | 6         | 122267255        | transporter                    |
| <b>Cebpa</b>  | <b>CCAAT/enhancer binding protein (C/EBP), alpl</b>  | <b>57</b>  | <b>56</b>  | <b>9.7E-01</b> | <b>1.0</b> | <b>38</b> | <b>81</b>  | <b>2.2E-12</b> | <b>2.1</b> | <b>1</b>  | <b>7</b>  | <b>35906896</b>  | <b>transcription regulator</b> |
| Slc2a6        | Solute carrier family 2 (facilitated glucose transpo | 11         | 32         | 6.1E-09        | 2.8        | 16        | 34         | 5.9E-06        | 2.1        | 2         | 2         | 26877139         | transporter                    |
| Plau          | Plasminogen activator, urokinase                     | 27         | 46         | 5.4E-05        | 1.7        | 15        | 32         | 8.2E-06        | 2.1        | 0         | 14        | 21662317         | peptidase                      |
| 2310066E14Rik | RIKEN cDNA 2310066E14 gene                           | 20         | 21         | 7.3E-01        | 1.1        | 15        | 32         | 8.2E-06        | 2.1        | 5         | 8         | 108145781        |                                |
| Rnf24         | Ring finger protein 24                               | 22         | 22         | 1.0E+00        | 1.0        | 14        | 31         | 1.6E-05        | 2.1        | 4         | 2         | 131124270        | other                          |
| Panx1         | Pannexin 1                                           | 6          | 15         | 5.7E-04        | 2.4        | 9         | 20         | 4.9E-04        | 2.1        | 0         | 9         | 14810228         | transporter                    |
| Arid4a        | AT rich interactive domain 4A (Rbp1 like)            | 15         | 18         | 3.7E-01        | 1.2        | 9         | 19         | 6.8E-04        | 2.1        | 7         | 12        | 72198625         | transcription regulator        |
| Crtap         | Cartilage associated protein                         | 58         | 66         | 1.8E-01        | 1.2        | 77        | 164        | 2.3E-23        | 2.1        | 22        | 9         | 114284364        | other                          |
| Alox5ap       | Arachidonate 5-lipoxygenase activating protein       | 33         | 38         | 2.7E-01        | 1.2        | 32        | 68         | 1.5E-10        | 2.1        | 5         | 5         | 150099196        | other                          |
| Rnd1          | Rho family GTPase 1                                  | 66         | 45         | 5.7E-04        | 0.7        | 20        | 43         | 3.0E-07        | 2.1        | 0         | 15        | 98500470         | enzyme                         |
| Tort1aip2     | Torsin A interacting protein 2                       | 34         | 55         | 7.4E-05        | 1.6        | 34        | 72         | 6.1E-11        | 2.1        | 2         | 1         | 157914672        | other                          |
| Myh9          | Myosin, heavy polypeptide 9, non-muscle              | 26         | 36         | 2.3E-02        | 1.4        | 33        | 70         | 8.2E-11        | 2.1        | 4         | 8         | 34805080         | enzyme                         |
| Ammecr1l      | AMME chromosomal region gene 1-like                  | 38         | 48         | 7.3E-02        | 1.2        | 32        | 67         | 2.2E-10        | 2.1        | 17        | 18        | 31943358         | other                          |
| Slc7a2        | Solute carrier family 7 (cationic amino acid transp  | 10         | 17         | 2.6E-02        | 1.6        | 22        | 47         | 1.1E-07        | 2.1        | 1         | 8         | 42007299         | transporter                    |
| Dnajc10       | DnaJ (Hsp40) homolog, subfamily C, member 10         | 13         | 21         | 1.6E-02        | 1.6        | 15        | 32         | 1.2E-05        | 2.1        | 6         | 2         | 80193186         | enzyme                         |
| Rangap1       | RAN GTPase activating protein 1                      | 21         | 26         | 2.3E-01        | 1.2        | 20        | 43         | 4.4E-07        | 2.1        | 6         | 20        | 103949308        | other                          |
| 1110001P04Rik | RIKEN cDNA 1110001P04 gene                           | 17         | 22         | 1.5E-01        | 1.3        | 14        | 29         | 3.3E-05        | 2.1        | 7         | 9         | 44448092         |                                |
| Orc6l         | Origin recognition complex, subunit 6-like (S. cere  | 10         | 11         | 5.4E-01        | 1.2        | 11        | 23         | 2.5E-04        | 2.1        | 4         | 8         | 87831738         | other                          |
| Pcdhga12      | Protocadherin gamma subfamily A, 12                  | 20         | 17         | 4.9E-01        | 0.9        | 10        | 21         | 3.5E-04        | 2.1        | 5         | 18        | 38000557         | other                          |



|               |                                                    |           |           |                |            |           |            |                |            |           |           |                  |                                 |
|---------------|----------------------------------------------------|-----------|-----------|----------------|------------|-----------|------------|----------------|------------|-----------|-----------|------------------|---------------------------------|
| Mier1         | Mesoderm induction early response 1 homolog (X     | 45        | 54        | 9.8E-02        | 1.2        | 41        | 81         | 1.3E-10        | 2.0        | 9         | 4         | 102837971        | other                           |
| Supt5h        | Suppressor of Ty 5 homolog (S. cerevisiae)         | 34        | 70        | 3.6E-10        | 2.0        | 38        | 74         | 8.9E-10        | 2.0        | 16        | 7         | 29100080         | transcription regulator         |
| Tln1          | Tln1                                               | 28        | 39        | 2.1E-02        | 1.4        | 23        | 46         | 1.5E-06        | 2.0        | 8         | 4         | 43568612         | other                           |
| Tie4          | Transducin-like enhancer of split 4, homolog of Dr | 32        | 37        | 2.6E-01        | 1.2        | 22        | 43         | 2.9E-06        | 2.0        | 9         | 19        | 14523055         | transcription regulator         |
| Cxcl4         | Chemokine (C-X-C motif) ligand 4                   | 157       | 279       | 3.5E-25        | 1.8        | 176       | 345        | 1.5E-39        | 2.0        | 1         | 5         | 91201607         |                                 |
| Igfbp5        | Insulin-like growth factor binding protein 5       | 34        | 69        | 3.9E-10        | 2.1        | 59        | 115        | 2.4E-14        | 2.0        | 5         | 1         | 72905534         | other                           |
| Ctnn          | Cortactin                                          | 27        | 40        | 3.9E-03        | 1.5        | 31        | 61         | 3.1E-08        | 2.0        | 11        | 18        | 36366398         | other                           |
| Znrf1         | Zinc and ring finger 1                             | 40        | 33        | 1.7E-01        | 0.8        | 31        | 61         | 3.1E-08        | 2.0        | 14        | 8         | 114145507        | other                           |
| Srpk1         | Serine/arginine-rich protein specific kinase 1     | 15        | 20        | 1.7E-01        | 1.3        | 14        | 27         | 2.1E-04        | 2.0        | 5         | 20        | 86000801         | kinase                          |
| Foxp4         | Forkhead box P4                                    | 18        | 22        | 2.1E-01        | 1.3        | 14        | 27         | 2.1E-04        | 2.0        | 5         | 17        | 48004142         | transcription regulator         |
| Fvt1          | Follicular lymphoma variant translocation 1        | 7         | 8         | 4.2E-01        | 1.2        | 11        | 22         | 7.9E-04        | 2.0        | 2         | 1         | 108621322        | enzyme                          |
| Tm4sf1        | Transmembrane 4 superfamily member 1               | 442       | 403       | 2.0E-02        | 0.9        | 229       | 447        | 2.0E-50        | 2.0        | 25        | 3         | 57091538         | other                           |
| Ly6c1         | Lymphocyte antigen 6 complex, locus C1             | 288       | 289       | 9.5E-01        | 1.0        | 161       | 313        | 1.1E-35        | 2.0        | 118       | 15        | 74875500         |                                 |
| Vkorc1        | Vitamin K epoxide reductase complex, subunit 1     | 94        | 110       | 4.5E-02        | 1.2        | 98        | 192        | 1.4E-22        | 2.0        | 7         | 7         | 135036641        | enzyme                          |
| <b>Calcr1</b> | <b>Calcitonin receptor-like</b>                    | <b>62</b> | <b>64</b> | <b>6.7E-01</b> | <b>1.0</b> | <b>61</b> | <b>120</b> | <b>1.3E-14</b> | <b>2.0</b> | <b>9</b>  | <b>2</b>  | <b>84171161</b>  | <b>protein coupled receptor</b> |
| Edem1         | ER degradation enhancer, mannosidase alpha-like    | 41        | 56        | 6.3E-03        | 1.4        | 46        | 90         | 2.0E-11        | 2.0        | 3         | 6         | 108809187        | enzyme                          |
| Acot9         | Acyl-CoA thioesterase 9                            | 73        | 71        | 8.4E-01        | 1.0        | 35        | 68         | 6.4E-09        | 1.9        | 23        | 20        | 151731893        | enzyme                          |
| Stag2         | Stag2                                              | 43        | 41        | 7.3E-01        | 1.0        | 31        | 60         | 6.1E-08        | 1.9        | 16        | 20        | 39629852         | other                           |
| Ccdc49        | Coiled-coil domain containing 49                   | 18        | 28        | 1.1E-02        | 1.5        | 16        | 32         | 7.8E-05        | 1.9        | 2         | 9         | 67690420         | other                           |
| Atad2         | ATPase family, AAA domain containing 2             | 12        | 11        | 8.2E-01        | 0.9        | 14        | 28         | 2.1E-04        | 1.9        | 2         | 15        | 57925869         | other                           |
| Sft2d1        | SFT2 domain containing 1                           | 18        | 36        | 2.6E-05        | 1.9        | 27        | 53         | 4.3E-07        | 1.9        | 5         | 17        | 8519957          | other                           |
| Arc           | Activity regulated cytoskeletal-associated protein | 40        | 35        | 3.2E-01        | 0.9        | 27        | 51         | 5.9E-07        | 1.9        | 14        | 15        | 74499712         | other                           |
| Nckap1        | NCK associated protein 1 like                      | 23        | 26        | 3.4E-01        | 1.2        | 15        | 28         | 2.1E-04        | 1.9        | 0         | 15        | 103329151        | other                           |
| Ace           | Ace                                                | 166       | 195       | 9.2E-03        | 1.2        | 115       | 221        | 7.6E-25        | 1.9        | 4         | 11        | 105851238        | peptidase                       |
| Tspan4        | Tetraspanin 4                                      | 70        | 91        | 4.1E-03        | 1.3        | 74        | 143        | 1.2E-16        | 1.9        | 17        | 7         | 148679236        | other                           |
| Calr          | Calreticulin                                       | 42        | 80        | 1.3E-09        | 1.9        | 66        | 127        | 7.7E-15        | 1.9        | 11        | 8         | 87368826         | transcription regulator         |
| Lox2          | Lysyl oxidase-like 2                               | 48        | 53        | 3.5E-01        | 1.1        | 60        | 115        | 9.5E-14        | 1.9        | 0         | 14        | 70093410         | enzyme                          |
| Cap1          | CAP, adenylate cyclase-associated protein 1 (yea   | 48        | 58        | 9.0E-02        | 1.2        | 45        | 86         | 1.4E-10        | 1.9        | 6         | 4         | 122536709        | other                           |
| <b>Cfdp1</b>  | <b>Craniofacial development protein 1</b>          | <b>56</b> | <b>54</b> | <b>7.0E-01</b> | <b>1.0</b> | <b>40</b> | <b>77</b>  | <b>1.3E-09</b> | <b>1.9</b> | <b>28</b> | <b>8</b>  | <b>114292506</b> | <b>other</b>                    |
| Pcip1         | PC4 and SFRS1 interacting protein 1                | 26        | 29        | 5.5E-01        | 1.1        | 27        | 51         | 8.2E-07        | 1.9        | 7         | 4         | 83101927         | other                           |
| Tmcc3         | Transmembrane and coiled coil domains 3            | 59        | 57        | 8.4E-01        | 1.0        | 21        | 40         | 1.1E-05        | 1.9        | 23        | 10        | 94053539         | other                           |
| Ints8         | Integrator complex subunit 8                       | 26        | 29        | 4.6E-01        | 1.1        | 16        | 31         | 1.1E-04        | 1.9        | 5         | 4         | 11136419         | other                           |
| Yes1          | Yamaquchi sarcoma viral (v-yes) oncogene homo      | 31        | 30        | 9.7E-01        | 1.0        | 16        | 31         | 1.1E-04        | 1.9        | 11        | 5         | 32989894         | kinase                          |
| Pkd2          | Polycystic kidney disease 2                        | 65        | 74        | 1.6E-01        | 1.1        | 65        | 124        | 2.0E-14        | 1.9        | 11        | 5         | 104934547        | ion channel                     |
| Pecam1        | Platelet/endothelial cell adhesion molecule 1      | 88        | 83        | 4.9E-01        | 0.9        | 48        | 92         | 4.1E-11        | 1.9        | 16        | 11        | 106515822        | other                           |
| Nr4a2         | Nuclear receptor subfamily 4, group A, member 2    | 19        | 45        | 3.2E-09        | 2.4        | 21        | 40         | 1.5E-05        | 1.9        | 0         | 2         | 56960037         | d-dependent nuclear receptor    |
| Traf3         | Tnf receptor-associated factor 3                   | 21        | 28        | 7.0E-02        | 1.3        | 17        | 33         | 7.9E-05        | 1.9        | 9         | 12        | 112505212        | other                           |
| Zfyve1        | Zinc finger, FYVE domain containing 1              | 14        | 15        | 6.5E-01        | 1.1        | 15        | 29         | 2.1E-04        | 1.9        | 7         | 12        | 84887885         | other                           |
| Ergic3        | ERGIC and golgi 3                                  | 45        | 74        | 2.8E-06        | 1.6        | 52        | 98         | 1.6E-11        | 1.9        | 19        | 2         | 155844015        | other                           |
| Nucb1         | Nucleobindin 1                                     | 41        | 71        | 4.7E-07        | 1.7        | 49        | 94         | 4.1E-11        | 1.9        | 19        | 7         | 52748324         | other                           |
| Pdcd6ip       | Programmed cell death 6 interacting protein        | 41        | 54        | 1.4E-02        | 1.3        | 38        | 72         | 6.7E-09        | 1.9        | 15        | 9         | 113564207        | other                           |
| Snf1lk        | SNF1-like kinase                                   | 41        | 42        | 8.0E-01        | 1.0        | 16        | 31         | 1.5E-04        | 1.9        | 10        | 17        | 31981294         | kinase                          |
| Arid5b        | AT rich interactive domain 5B (Mrf1 like)          | 20        | 22        | 5.6E-01        | 1.1        | 15        | 29         | 2.1E-04        | 1.9        | 5         | 10        | 67591589         | transcription regulator         |
| Rps18         | Ribosomal protein S18                              | 719       | 924       | 8.5E-19        | 1.3        | 627       | 1184       | 1.1E-119       | 1.9        | 234       | 13        | 28349714         | other                           |
| Plac9         | Placenta specific 9                                | 41        | 41        | 9.3E-01        | 1.0        | 36        | 68         | 2.4E-08        | 1.9        | 1         | 14        | 27001746         | other                           |
| Sap30         | Sin3 associated polypeptide                        | 47        | 29        | 9.4E-04        | 0.6        | 32        | 60         | 1.7E-07        | 1.9        | 15        | 8         | 59961792         | transcription regulator         |
| Api5          | Apoptosis inhibitor 5                              | 43        | 37        | 2.5E-01        | 0.9        | 28        | 54         | 6.1E-07        | 1.9        | 10        | 3         | 90565134         | other                           |
| Rap2b         | RAP2B, member of RAS oncogene family               | 44        | 56        | 3.4E-02        | 1.3        | 26        | 49         | 2.2E-06        | 1.9        | 3         | 3         | 61170591         | enzyme                          |
| Parp12        | Poly (ADP-ribose) polymerase family, member 12     | 21        | 26        | 1.9E-01        | 1.2        | 20        | 38         | 3.0E-05        | 1.9        | 2         | 6         | 39037455         | other                           |
| Erf           | Ets2 repressor factor                              | 31        | 25        | 1.8E-01        | 0.8        | 19        | 36         | 5.8E-05        | 1.9        | 4         | 7         | 26028547         | transcription regulator         |
| Ctbp2         | C-terminal binding protein 2                       | 13        | 16        | 2.3E-01        | 1.3        | 15        | 29         | 3.0E-04        | 1.9        | 3         | 7         | 140186955        | transcription regulator         |
| Tmsb4x        | Thymosin, beta 4, X chromosome                     | 1826      | 1820      | 8.7E-01        | 1.0        | 1207      | 2262       | 3.2E-222       | 1.9        | 201       | 20        | 163645206        | other                           |
| Scotin        | Scotin gene                                        | 40        | 47        | 1.7E-01        | 1.2        | 45        | 84         | 1.0E-09        | 1.9        | 1         | 9         | 108959738        |                                 |
| Lasp1         | LIM and SH3 protein 1                              | 66        | 62        | 5.9E-01        | 0.9        | 45        | 84         | 1.0E-09        | 1.9        | 3         | 11        | 97699665         | transporter                     |
| Tmem64        | Transmembrane protein 64                           | 67        | 64        | 7.1E-01        | 1.0        | 42        | 78         | 3.6E-09        | 1.9        | 15        | 4         | 15212282         | other                           |
| Gnb4          | Guanine nucleotide binding protein, beta 4         | 18        | 20        | 5.9E-01        | 1.1        | 22        | 42         | 1.6E-05        | 1.9        | 4         | 3         | 32483447         | enzyme                          |
| Jarid1a       | Jumonji, AT rich interactive domain 1A (Rbp2 like) | 22        | 23        | 6.8E-01        | 1.1        | 19        | 35         | 8.0E-05        | 1.9        | 10        | 6         | 120391622        | transcription regulator         |
| Inoc1         | INO80 complex homolog 1 (S. cerevisiae)            | 18        | 20        | 5.6E-01        | 1.1        | 17        | 32         | 1.6E-04        | 1.9        | 6         | 2         | 119199736        | other                           |
| 5830411G16Rik | RIKEN cDNA 5830411G16 gene                         | 19        | 22        | 3.2E-01        | 1.2        | 16        | 29         | 3.0E-04        | 1.9        | 2         | 6         | 56711819         |                                 |
| Ifi30         | Interferon gamma inducible protein 30              | 161       | 192       | 3.5E-03        | 1.2        | 171       | 319        | 2.1E-32        | 1.9        | 1         | 8         | 73286777         | enzyme                          |
| <b>Igf1</b>   | <b>Insulin-like growth factor 1</b>                | <b>68</b> | <b>93</b> | <b>5.8E-04</b> | <b>1.4</b> | <b>96</b> | <b>179</b> | <b>8.7E-19</b> | <b>1.9</b> | <b>1</b>  | <b>10</b> | <b>87393804</b>  | <b>growth factor</b>            |
| Ppp1r14b      | Protein phosphatase 1, regulatory (inhibitor) subu | 52        | 70        | 3.5E-03        | 1.4        | 54        | 101        | 2.2E-11        | 1.9        | 25        | 19        | 7051641          | phosphatase                     |
| Tmem140       | Transmembrane protein 140                          | 77        | 64        | 5.1E-02        | 0.8        | 48        | 89         | 3.9E-10        | 1.9        | 12        | 6         | 34823738         | other                           |
| Sept8         | Septin 8                                           | 43        | 46        | 5.4E-01        | 1.1        | 33        | 61         | 2.3E-07        | 1.9        | 10        | 11        | 53357525         | other                           |
| Ube2j2        | Ubiquitin-conjugating enzyme E2, J2 homolog (ye    | 28        | 29        | 7.9E-01        | 1.0        | 23        | 43         | 1.6E-05        | 1.9        | 13        | 4         | 155331292        | enzyme                          |
| Ube2l6        | Ubiquitin-conjugating enzyme E2L 6                 | 11        | 21        | 3.4E-03        | 1.8        | 14        | 27         | 5.8E-04        | 1.9        | 0         | 2         | 84649869         | enzyme                          |
| Vps11         | Vacuolar protein sorting 11 (yeast)                | 15        | 17        | 4.1E-01        | 1.2        | 14        | 26         | 8.2E-04        | 1.9        | 6         | 9         | 44156421         | transporter                     |
| Icam1         | Intercellular adhesion molecule                    | 728       | 992       | 6.0E-29        | 1.4        | 607       | 1121       | 6.2E-107       | 1.9        | 2         | 9         | 20833107         | transmembrane receptor          |
| Daxx          | Fas death domain-associated protein                | 52        | 92        | 2.9E-09        | 1.8        | 82        | 152        | 4.7E-16        | 1.9        | 4         | 17        | 34052355         | transcription regulator         |

|                |                                                      |           |           |                |            |           |            |                |            |           |          |                 |                                |
|----------------|------------------------------------------------------|-----------|-----------|----------------|------------|-----------|------------|----------------|------------|-----------|----------|-----------------|--------------------------------|
| Vwf            | Von Willebrand factor homolog                        | 78        | 77        | 9.9E-01        | 1.0        | 32        | 60         | 3.2E-07        | 1.9        | 4         | 6        | 125636593       | other                          |
| Cept1          | Choline/ethanolaminephosphotransferase 1             | 41        | 48        | 2.3E-01        | 1.2        | 30        | 55         | 1.2E-06        | 1.9        | 14        | 3        | 106305963       | enzyme                         |
| Pdgfrl         | Platelet-derived growth factor receptor-like         | 14        | 23        | 5.7E-03        | 1.7        | 19        | 36         | 8.0E-05        | 1.9        | 0         | 8        | 42076072        | kinase                         |
| Serping1       | Serine (or cysteine) peptidase inhibitor, clade G, n | 661       | 849       | 2.8E-17        | 1.3        | 484       | 889        | 4.4E-84        | 1.8        | 6         | 2        | 84605758        | other                          |
| Id1            | Inhibitor of DNA binding 1                           | 83        | 98        | 4.2E-02        | 1.2        | 57        | 106        | 2.2E-11        | 1.8        | 17        | 2        | 152562712       | transcription regulator        |
| Trim28         | Tripartite motif protein 28                          | 53        | 59        | 2.8E-01        | 1.1        | 38        | 70         | 4.6E-08        | 1.8        | 14        | 7        | 13616091        | transcription regulator        |
| Furin          | Furin (paired basic amino acid cleaving enzyme)      | 48        | 55        | 2.2E-01        | 1.2        | 36        | 66         | 1.2E-07        | 1.8        | 13        | 7        | 87534602        | peptidase                      |
| Sec31a         | SEC31 homolog A (S. cerevisiae)                      | 20        | 45        | 1.7E-08        | 2.3        | 35        | 64         | 1.7E-07        | 1.8        | 9         | 5        | 100790990       | other                          |
| Slc25a24       | Solute carrier family 25 (mitochondrial carrier, pho | 19        | 16        | 4.9E-01        | 0.9        | 16        | 29         | 4.2E-04        | 1.8        | 1         | 3        | 108971236       | other                          |
| Wbp7           | WW domain binding protein 7                          | 13        | 22        | 2.7E-03        | 1.8        | 14        | 26         | 8.1E-04        | 1.8        | 5         | 7        | 31354068        |                                |
| Aqp1           | Aquaporin 1                                          | 199       | 189       | 3.8E-01        | 1.0        | 84        | 155        | 6.4E-16        | 1.8        | 78        | 6        | 55298301        | transporter                    |
| <b>Foxp1</b>   | <b>Forkhead box P1</b>                               | <b>38</b> | <b>37</b> | <b>8.7E-01</b> | <b>1.0</b> | <b>27</b> | <b>49</b>  | <b>5.8E-06</b> | <b>1.8</b> | <b>9</b>  | <b>6</b> | <b>98879577</b> | <b>transcription regulator</b> |
| Antxr1         | Anthrax toxin receptor 1                             | 24        | 28        | 2.8E-01        | 1.2        | 15        | 28         | 5.8E-04        | 1.8        | 0         | 6        | 87084187        | other                          |
| Ctsa           | Cathepsin A                                          | 61        | 117       | 7.1E-14        | 1.9        | 84        | 153        | 1.6E-15        | 1.8        | 16        | 2        | 164664752       | peptidase                      |
| Gorasp2        | Golgi reassembly stacking protein 2                  | 68        | 88        | 5.1E-03        | 1.3        | 72        | 132        | 1.8E-13        | 1.8        | 34        | 2        | 70529578        | other                          |
| 0610031J06Rik  | RIKEN cDNA 0610031J06 gene                           | 91        | 112       | 1.1E-02        | 1.2        | 68        | 124        | 6.6E-13        | 1.8        | 17        | 3        | 88132525        |                                |
| Sbno1          | Sno, strawberry notch homolog 1 (Drosophila)         | 60        | 70        | 1.4E-01        | 1.2        | 48        | 86         | 2.5E-09        | 1.8        | 26        | 5        | 124823417       | enzyme                         |
| Rnpep          | Arginyl aminopeptidase (aminopeptidase B)            | 26        | 41        | 1.8E-03        | 1.5        | 32        | 57         | 1.1E-06        | 1.8        | 5         | 1        | 137159367       | peptidase                      |
| Plxn1          | Plexin A1                                            | 18        | 11        | 2.9E-02        | 0.6        | 15        | 27         | 8.1E-04        | 1.8        | 4         | 6        | 89266559        | transmembrane receptor         |
| Oaf            | OAF homolog (Drosophila)                             | 152       | 128       | 1.5E-02        | 0.8        | 114       | 207        | 4.7E-20        | 1.8        | 2         | 9        | 43030074        | other                          |
| Bcl10          | B-cell leukemia/lymphoma 10                          | 101       | 114       | 1.1E-01        | 1.1        | 87        | 158        | 1.1E-15        | 1.8        | 6         | 3        | 145596990       | transcription regulator        |
| Hsp110         | Heat shock protein 110                               | 170       | 131       | 1.3E-04        | 0.8        | 83        | 149        | 7.5E-15        | 1.8        | 37        | 5        | 150419479       |                                |
| Becn1          | Beclin 1 (coiled-coil, myosin-like BCL2-interacting  | 24        | 44        | 9.1E-06        | 1.9        | 35        | 64         | 3.1E-07        | 1.8        | 7         | 11       | 101149920       | other                          |
| Nucb2          | Nucleobindin 2                                       | 23        | 27        | 3.4E-01        | 1.2        | 27        | 49         | 7.9E-06        | 1.8        | 1         | 7        | 123683592       | other                          |
| Edg2           | Endothelial differentiation, lysophosphatidic acid C | 43        | 37        | 2.3E-01        | 0.9        | 25        | 45         | 2.1E-05        | 1.8        | 1         | 4        | 58448347        | l-protein coupled receptor     |
| Zfx            | Zinc finger protein X-linked                         | 25        | 28        | 4.4E-01        | 1.1        | 21        | 38         | 7.9E-05        | 1.8        | 10        | 20       | 91320081        | transcription regulator        |
| Slc6a6         | Solute carrier family 6 (neurotransmitter transport  | 76        | 85        | 2.0E-01        | 1.1        | 69        | 125        | 1.2E-12        | 1.8        | 25        | 6        | 91708473        | transporter                    |
| Dnajc3a        | Dnaj (Hsp40) homolog, subfamily C, member 3A         | 93        | 76        | 2.2E-02        | 0.8        | 69        | 124        | 1.6E-12        | 1.8        | 16        | 14       | 119380835       |                                |
| Gns            | Glucosamine (N-acetyl)-6-sulfatase                   | 47        | 59        | 3.9E-02        | 1.3        | 51        | 92         | 1.3E-09        | 1.8        | 20        | 10       | 120833810       | enzyme                         |
| Cebpg          | CCAAT/enhancer binding protein (C/EBP), gamma        | 56        | 64        | 1.9E-01        | 1.2        | 51        | 92         | 1.3E-09        | 1.8        | 11        | 7        | 35832691        | transcription regulator        |
| Ruvbl1         | RuvB-like protein 1                                  | 49        | 63        | 1.6E-02        | 1.3        | 38        | 68         | 1.6E-07        | 1.8        | 15        | 6        | 88447487        | transcription regulator        |
| Vasp           | Vasodilator-stimulated phosphoprotein                | 24        | 33        | 3.8E-02        | 1.4        | 30        | 54         | 3.0E-06        | 1.8        | 4         | 7        | 19842908        | other                          |
| Snai1          | Snail homolog 1 (Drosophila)                         | 24        | 15        | 1.4E-02        | 0.6        | 17        | 30         | 5.7E-04        | 1.8        | 1         | 2        | 167368106       | other                          |
| Hspa5          | Heat shock protein 5                                 | 1573      | 2096      | 1.4E-51        | 1.3        | 1508      | 2696       | 3.3E-232       | 1.8        | 498       | 2        | 34631919        | other                          |
| Cald1          | Cald1                                                | 139       | 170       | 1.8E-03        | 1.2        | 189       | 338        | 6.7E-31        | 1.8        | 15        | 6        | 34725345        | other                          |
| Bst2           | Bone marrow stromal cell antigen 2                   | 27        | 47        | 2.1E-05        | 1.8        | 41        | 73         | 8.2E-08        | 1.8        | 3         | 8        | 74058640        | other                          |
| Golim4         | Golgi integral membrane protein 4                    | 39        | 49        | 5.5E-02        | 1.3        | 39        | 70         | 1.6E-07        | 1.8        | 13        | 3        | 75680682        | other                          |
| 1700047117Rik1 | RIKEN cDNA 1700047117 gene 1                         | 10        | 12        | 4.8E-01        | 1.2        | 16        | 29         | 7.9E-04        | 1.8        | 3         | 12       | 56376403        |                                |
| Lyzs           | Lysozyme                                             | 1718      | 2089      | 9.1E-26        | 1.2        | 1161      | 2066       | 7.9E-176       | 1.8        | 6         | 10       | 116725058       |                                |
| Ccl21b         | Chemokine (C-C motif) ligand 21b                     | 343       | 712       | 4.2E-92        | 2.1        | 496       | 882        | 7.2E-76        | 1.8        | 3         | 4        | 42232107        |                                |
| Klf6           | Kruppel-like factor 6                                | 403       | 458       | 9.5E-04        | 1.1        | 321       | 573        | 1.4E-50        | 1.8        | 39        | 13       | 5868865         | transcription regulator        |
| Aspn           | Asporin                                              | 184       | 135       | 2.6E-06        | 0.7        | 78        | 139        | 2.2E-13        | 1.8        | 5         | 13       | 49662848        | other                          |
| Zzz3           | Zinc finger, ZZ domain containing 3                  | 57        | 50        | 2.5E-01        | 0.9        | 43        | 76         | 5.8E-08        | 1.8        | 12        | 13       | 75465728        | other                          |
| Tmem176b       | Transmembrane protein 176B                           | 55        | 87        | 2.1E-06        | 1.6        | 93        | 164        | 3.3E-15        | 1.8        | 7         | 6        | 48784599        | other                          |
| Tmem184b       | Transmembrane protein 184b                           | 46        | 69        | 1.4E-04        | 1.5        | 51        | 91         | 4.3E-09        | 1.8        | 13        | 15       | 79191235        | other                          |
| Gm2a           | GM2 ganglioside activator protein                    | 33        | 68        | 4.1E-10        | 2.1        | 41        | 72         | 1.5E-07        | 1.8        | 8         | 11       | 54924320        | enzyme                         |
| Loh11cr2a      | Loss of heterozygosity, 11, chromosomal region 2     | 31        | 34        | 5.0E-01        | 1.1        | 22        | 39         | 1.1E-04        | 1.8        | 14        | 9        | 38550514        | other                          |
| Spire1         | Spire homolog 1 (Drosophila)                         | 19        | 24        | 1.6E-01        | 1.3        | 17        | 30         | 7.7E-04        | 1.8        | 2         | 18       | 67649684        | other                          |
| Sgk            | Serum/glucocorticoid regulated kinase                | 268       | 335       | 1.9E-06        | 1.3        | 322       | 566        | 8.2E-48        | 1.8        | 17        | 10       | 21719604        | kinase                         |
| Lyve1          | Lymphatic vessel endothelial hyaluronan receptor     | 338       | 325       | 4.1E-01        | 1.0        | 239       | 421        | 2.2E-36        | 1.8        | 2         | 7        | 117994421       | transmembrane receptor         |
| Tgfb1          | Tgfb1                                                | 137       | 230       | 7.7E-18        | 1.7        | 177       | 310        | 5.8E-27        | 1.8        | 1         | 13       | 56740682        | other                          |
| Pcnp           | PEST proteolytic signal containing nuclear protein   | 104       | 88        | 4.9E-02        | 0.9        | 63        | 111        | 1.2E-10        | 1.8        | 46        | 16       | 56015820        | other                          |
| Anxa7          | Annexin A7                                           | 79        | 79        | 9.4E-01        | 1.0        | 59        | 104        | 4.4E-10        | 1.8        | 28        | 14       | 21275554        | ion channel                    |
| Capn12         | Calpain 12                                           | 63        | 52        | 8.9E-02        | 0.8        | 51        | 90         | 7.8E-09        | 1.8        | 15        | 7        | 29678285        | peptidase                      |
| Ccnd3          | Cyclin D3                                            | 50        | 43        | 2.1E-01        | 0.9        | 29        | 52         | 1.0E-05        | 1.8        | 22        | 17       | 47736608        | other                          |
| Zbtb2          | Zinc finger and BTB domain containing 2              | 44        | 40        | 4.6E-01        | 0.9        | 26        | 45         | 3.8E-05        | 1.8        | 4         | 10       | 5979237         | other                          |
| 5830415L20Rik  | 5830415L20Rik                                        | 34        | 19        | 4.8E-04        | 0.6        | 25        | 45         | 3.8E-05        | 1.8        | 8         | 5        | 3554644         |                                |
| Rbm3           | RNA binding motif protein 3                          | 324       | 264       | 1.8E-05        | 0.8        | 266       | 465        | 7.3E-39        | 1.8        | 82        | 13       | 60743812        | other                          |
| Atp6v0b        | ATPase, H+ transporting, lysosomal V0 subunit B      | 118       | 157       | 2.7E-05        | 1.3        | 132       | 230        | 4.1E-20        | 1.8        | 35        | 4        | 117557889       | transporter                    |
| Cygb           | Cytoglobin                                           | 80        | 110       | 1.1E-04        | 1.4        | 90        | 157        | 2.8E-14        | 1.8        | 1         | 11       | 116507910       | transporter                    |
| Actn1          | Actinin, alpha 1                                     | 86        | 66        | 6.0E-03        | 0.8        | 72        | 127        | 8.8E-12        | 1.8        | 22        | 12       | 81268694        | other                          |
| Scamp2         | Secretory carrier membrane protein 2                 | 72        | 71        | 9.0E-01        | 1.0        | 59        | 103        | 7.8E-10        | 1.8        | 25        | 9        | 57436561        | transporter                    |
| Tpbp           | Trophoblast glycoprotein                             | 44        | 53        | 7.8E-02        | 1.2        | 37        | 64         | 1.0E-06        | 1.8        | 0         | 9        | 85739352        | other                          |
| Plekfh2        | Pleckstrin homology domain containing, family F (    | 26        | 31        | 2.0E-01        | 1.2        | 25        | 44         | 5.2E-05        | 1.8        | 2         | 4        | 10915808        | other                          |
| Iqgap1         | IQ motif containing GTPase activating protein 1      | 138       | 189       | 9.8E-07        | 1.4        | 170       | 296        | 3.0E-25        | 1.7        | 18        | 7        | 87856735        | other                          |
| <b>Tbrg1</b>   | <b>Transforming growth factor beta regulated ger</b> | <b>59</b> | <b>70</b> | <b>7.5E-02</b> | <b>1.2</b> | <b>66</b> | <b>114</b> | <b>1.1E-10</b> | <b>1.7</b> | <b>18</b> | <b>9</b> | <b>37457059</b> | <b>other</b>                   |
| Yrdc           | YrdC domain containing (E.coli)                      | 41        | 59        | 1.6E-03        | 1.4        | 44        | 76         | 1.4E-07        | 1.7        | 6         | 4        | 124531813       | other                          |
| Sec63          | SEC63-like (S. cerevisiae)                           | 36        | 58        | 7.4E-05        | 1.6        | 44        | 76         | 1.9E-07        | 1.7        | 17        | 10       | 42548706        | transporter                    |
| Smap1          | Stromal membrane-associated protein 1                | 41        | 45        | 4.3E-01        | 1.1        | 41        | 71         | 3.7E-07        | 1.7        | 11        | 1        | 23852643        | other                          |



|               |                                                       |           |            |                |            |           |            |                |            |           |          |                  |                              |
|---------------|-------------------------------------------------------|-----------|------------|----------------|------------|-----------|------------|----------------|------------|-----------|----------|------------------|------------------------------|
| Pias2         | Protein inhibitor of activated STAT 2                 | 48        | 49         | 9.3E-01        | 1.0        | 36        | 63         | 1.9E-06        | 1.7        | 12        | 18       | 77391720         | transcription regulator      |
| Samd8         | Sterile alpha motif domain containing 8               | 38        | 37         | 9.0E-01        | 1.0        | 32        | 55         | 9.5E-06        | 1.7        | 19        | 14       | 22617788         | other                        |
| Dtx2          | Deltex 2 homolog (Drosophila)                         | 17        | 26         | 1.7E-02        | 1.5        | 23        | 40         | 1.4E-04        | 1.7        | 1         | 5        | 136508734        | other                        |
| Tie1          | Tyrosine kinase receptor 1                            | 33        | 37         | 3.6E-01        | 1.1        | 19        | 33         | 5.3E-04        | 1.7        | 14        | 4        | 118143866        | kinase                       |
| LOC100039355  | Similar to Rps16 protein                              | 92        | 135        | 6.6E-07        | 1.5        | 88        | 153        | 1.6E-13        | 1.7        | 19        | 6        | 38234748         |                              |
| 1500003O03Rik | RIKEN cDNA 1500003O03 gene                            | 89        | 95         | 4.1E-01        | 1.1        | 82        | 142        | 1.5E-12        | 1.7        | 40        | 16       | 32410923         |                              |
| Toeb3         | Transcription elongation factor B (SIII), polypeptide | 33        | 51         | 6.3E-04        | 1.5        | 36        | 63         | 2.5E-06        | 1.7        | 8         | 4        | 135561394        | transcription regulator      |
| Col14a1       | Collagen, type XIV, alpha 1                           | 37        | 46         | 6.9E-02        | 1.3        | 30        | 52         | 1.8E-05        | 1.7        | 1         | 15       | 55351966         | other                        |
| Cdc42se1      | CDC42 small effector 1                                | 33        | 33         | 9.4E-01        | 1.0        | 27        | 46         | 5.0E-05        | 1.7        | 2         | 3        | 95038740         | other                        |
| Cbfb          | Core binding factor beta                              | 135       | 125        | 2.8E-01        | 0.9        | 121       | 208        | 1.8E-17        | 1.7        | 11        | 8        | 107741573        | transcription regulator      |
| Arhgdib       | Rho, GDP dissociation inhibitor (GDI) beta            | 84        | 115        | 1.5E-04        | 1.4        | 82        | 141        | 2.0E-12        | 1.7        | 2         | 6        | 136872587        | other                        |
| Hexa          | Hexosaminidase A                                      | 35        | 98         | 9.3E-24        | 2.8        | 58        | 99         | 4.6E-09        | 1.7        | 9         | 9        | 59412912         | enzyme                       |
| Ubp2l1        | Ubiquitin associated protein 2-like                   | 49        | 64         | 1.3E-02        | 1.3        | 45        | 78         | 1.8E-07        | 1.7        | 22        | 3        | 89810201         | other                        |
| Atg12         | Autophagy-related 12 (yeast)                          | 34        | 31         | 6.6E-01        | 0.9        | 25        | 43         | 9.5E-05        | 1.7        | 13        | 18       | 46892363         | other                        |
| Tmem189       | Transmembrane protein 189                             | 35        | 39         | 3.7E-01        | 1.1        | 24        | 42         | 1.3E-04        | 1.7        | 9         | 8        | 52963847         | other                        |
| Rps23         | Ribosomal protein S23                                 | 1221      | 1268       | 1.0E-01        | 1.0        | 874       | 1495       | 2.7E-113       | 1.7        | 280       | 13       | 91064184         | translation regulator        |
| Ptfr          | Polymerase I and transcript release factor            | 85        | 96         | 1.6E-01        | 1.1        | 76        | 129        | 3.2E-11        | 1.7        | 39        | 11       | 100818362        | transcription regulator      |
| Bat1a         | HLA-B-associated transcript 1A                        | 50        | 88         | 9.3E-09        | 1.8        | 71        | 121        | 1.6E-10        | 1.7        | 20        | 17       | 35390020         |                              |
| Pofut2        | Protein O-fucosyltransferase 2                        | 38        | 54         | 3.8E-03        | 1.4        | 43        | 74         | 4.4E-07        | 1.7        | 11        | 10       | 76732054         | enzyme                       |
| BC013672      | BC013672                                              | 35        | 48         | 1.0E-02        | 1.4        | 40        | 69         | 1.2E-06        | 1.7        | 2         | 8        | 64516444         | enzyme                       |
| Cdc27         | Cell division cycle 27 homolog (S. cerevisiae)        | 29        | 27         | 6.7E-01        | 0.9        | 26        | 45         | 9.0E-05        | 1.7        | 13        | 11       | 104364223        | other                        |
| Cpsf2         | Cleavage and polyadenylation specific factor 2        | 28        | 30         | 6.6E-01        | 1.1        | 25        | 43         | 1.3E-04        | 1.7        | 13        | 12       | 103241623        | other                        |
| Rpe           | Ribulose-5-phosphate-3-epimerase                      | 29        | 24         | 2.6E-01        | 0.8        | 23        | 39         | 2.5E-04        | 1.7        | 9         | 1        | 66765989         | enzyme                       |
| Car8          | Carbonic anhydrase 8                                  | 31        | 41         | 4.1E-02        | 1.3        | 22        | 37         | 3.6E-04        | 1.7        | 6         | 4        | 8068639          |                              |
| Ctgf          | Connective tissue growth factor                       | 1159      | 1187       | 3.1E-01        | 1.0        | 1483      | 2520       | 1.6E-185       | 1.7        | 307       | 10       | 24318435         | growth factor                |
| Rpl10a        | Ribosomal protein L10A                                | 1447      | 1643       | 8.2E-10        | 1.1        | 1456      | 2479       | 9.9E-184       | 1.7        | 548       | 17       | 28467918         | other                        |
| Myl6          | Myosin, light polypeptide 6, alkali, smooth muscle    | 276       | 263        | 3.4E-01        | 1.0        | 247       | 421        | 9.9E-33        | 1.7        | 42        | 4        | 14361431         | other                        |
| <b>Hpk1</b>   | <b>Homeodomain interacting protein kinase 1</b>       | <b>92</b> | <b>100</b> | <b>3.4E-01</b> | <b>1.1</b> | <b>81</b> | <b>137</b> | <b>1.5E-11</b> | <b>1.7</b> | <b>35</b> | <b>3</b> | <b>103544256</b> | <b>kinase</b>                |
| Sae2          | SUMO1 activating enzyme subunit 2                     | 40        | 37         | 6.5E-01        | 0.9        | 28        | 48         | 6.1E-05        | 1.7        | 19        | 7        | 34926122         | enzyme                       |
| Olfm1         | Olfactomedin 1                                        | 33        | 40         | 1.1E-01        | 1.2        | 27        | 46         | 8.7E-05        | 1.7        | 1         | 2        | 28069895         | other                        |
| Mobkl2a       | MOB1, Mps One Binder kinase activator-like 2A (y      | 15        | 19         | 2.2E-01        | 1.3        | 19        | 32         | 9.6E-04        | 1.7        | 1         | 10       | 80148324         | other                        |
| ler3          | Immediate early response 3                            | 618       | 992        | 1.1E-60        | 1.6        | 652       | 1101       | 2.8E-80        | 1.7        | 27        | 17       | 35959776         | other                        |
| Ube2j1        | Ubiquitin-conjugating enzyme E2, J1                   | 68        | 88         | 5.7E-03        | 1.3        | 58        | 99         | 1.0E-08        | 1.7        | 12        | 4        | 33136842         | enzyme                       |
| Nupl1         | Nucleoporin like 1                                    | 38        | 42         | 4.8E-01        | 1.1        | 30        | 51         | 4.2E-05        | 1.7        | 17        | 14       | 60837551         | transporter                  |
| Sepp1         | Selenoprotein P, plasma, 1                            | 2944      | 3182       | 1.3E-07        | 1.1        | 1659      | 2794       | 3.5E-199       | 1.7        | 232       | 15       | 3230235          | other                        |
| Cd164         | CD164 antigen                                         | 223       | 231        | 5.2E-01        | 1.0        | 166       | 278        | 4.3E-21        | 1.7        | 79        | 10       | 41250408         | other                        |
| Chic2         | Cysteine-rich hydrophobic domain 2                    | 132       | 110        | 1.6E-02        | 0.8        | 86        | 144        | 1.1E-11        | 1.7        | 13        | 5        | 75402595         | other                        |
| Kctd10        | Potassium channel tetramerisation domain contain      | 65        | 69         | 5.2E-01        | 1.1        | 68        | 115        | 9.4E-10        | 1.7        | 10        | 5        | 114813702        | ion channel                  |
| Gdpd3         | Glycerophosphodiester phosphodiesterase domain        | 108       | 101        | 4.6E-01        | 0.9        | 51        | 86         | 1.3E-07        | 1.7        | 22        | 7        | 133919036        | enzyme                       |
| ler2          | Immediate early response 2                            | 113       | 126        | 1.3E-01        | 1.1        | 88        | 147        | 1.0E-11        | 1.7        | 57        | 8        | 87185643         | other                        |
| Ssr1          | Signal sequence receptor, alpha                       | 71        | 63         | 2.4E-01        | 0.9        | 72        | 120        | 8.0E-10        | 1.7        | 22        | 13       | 38071064         | other                        |
| Ids           | Iduronate 2-sulfatase                                 | 54        | 65         | 7.2E-02        | 1.2        | 37        | 62         | 9.7E-06        | 1.7        | 23        | 20       | 67596375         | enzyme                       |
| Tbpl1         | TATA box binding protein-like 1                       | 39        | 30         | 1.0E-01        | 0.8        | 25        | 41         | 3.1E-04        | 1.7        | 10        | 10       | 22425375         | transcription regulator      |
| Cytl1         | Cytokine like 1                                       | 43        | 40         | 6.0E-01        | 0.9        | 21        | 35         | 8.6E-04        | 1.7        | 3         | 5        | 38130821         | other                        |
| Coro1b        | Coronin, actin binding protein 1B                     | 21        | 25         | 2.8E-01        | 1.2        | 21        | 35         | 8.7E-04        | 1.7        | 4         | 19       | 4153701          | other                        |
| Vat1          | Vesicle amine transport protein 1 homolog (T calif    | 249       | 387        | 7.5E-22        | 1.6        | 256       | 425        | 1.4E-30        | 1.7        | 5         | 11       | 101320154        | transporter                  |
| Stt3a         | STT3, subunit of the oligosaccharyltransferase co     | 66        | 59         | 2.8E-01        | 0.9        | 68        | 114        | 2.8E-09        | 1.7        | 8         | 9        | 36540190         | enzyme                       |
| Tmem176a      | Transmembrane protein 176A                            | 42        | 59         | 3.9E-03        | 1.4        | 64        | 107        | 7.8E-09        | 1.7        | 3         | 6        | 48795233         | other                        |
| AA536749      | Expressed sequence AA536749                           | 57        | 74         | 9.6E-03        | 1.3        | 55        | 92         | 8.2E-08        | 1.7        | 28        | 11       | 59589437         | other                        |
| Rab31         | RAB31, member RAS oncogene family                     | 40        | 42         | 7.2E-01        | 1.0        | 46        | 77         | 1.2E-06        | 1.7        | 4         | 17       | 66001341         | enzyme                       |
| 1500015O10Rik | RIKEN cDNA 1500015O10 gene                            | 11        | 10         | 9.1E-01        | 1.0        | 22        | 36         | 8.4E-04        | 1.7        | 0         | 1        | 43799362         |                              |
| Rpl22l1       | Ribosomal protein L22 like 1                          | 68        | 133        | 2.9E-16        | 2.0        | 100       | 165        | 1.4E-12        | 1.7        | 25        | 3        | 28706337         | other                        |
| Fem1b         | Feminization 1 homolog b (C. elegans)                 | 90        | 132        | 7.1E-07        | 1.5        | 91        | 151        | 1.5E-11        | 1.7        | 10        | 20       | 35643755         | transcription regulator      |
| Crry          | Complement receptor related protein                   | 91        | 97         | 4.0E-01        | 1.1        | 78        | 128        | 4.4E-10        | 1.7        | 35        | 1        | 196930029        |                              |
| Ap1g1         | Adaptor protein complex AP-1, gamma 1 subunit         | 49        | 44         | 4.1E-01        | 0.9        | 38        | 63         | 1.2E-05        | 1.7        | 21        | 8        | 112388012        | transporter                  |
| Cks2          | CDC28 protein kinase regulatory subunit 2             | 36        | 31         | 3.8E-01        | 0.9        | 33        | 55         | 4.8E-05        | 1.7        | 0         | 13       | 51745867         | kinase                       |
| Prpc          | Prolylcarboxypeptidase (angiotensinase C)             | 40        | 36         | 4.4E-01        | 0.9        | 32        | 52         | 6.8E-05        | 1.7        | 5         | 7        | 100155276        | peptidase                    |
| Aup1          | Ancient ubiquitin protein                             | 27        | 35         | 5.3E-02        | 1.3        | 32        | 52         | 6.9E-05        | 1.7        | 11        | 6        | 83007030         | other                        |
| 2610029G23Rik | RIKEN cDNA 2610029G23 gene                            | 28        | 36         | 7.3E-02        | 1.3        | 29        | 48         | 1.4E-04        | 1.7        | 2         | 20       | 102276749        |                              |
| Fasn          | Fatty acid synthase                                   | 24        | 32         | 3.8E-02        | 1.4        | 25        | 42         | 3.9E-04        | 1.7        | 6         | 11       | 120668589        | enzyme                       |
| Tegt          | Testis enhanced gene transcript                       | 141       | 181        | 9.8E-05        | 1.3        | 167       | 275        | 1.3E-19        | 1.6        | 40        | 15       | 99240191         | other                        |
| Nr4a1         | Nuclear receptor subfamily 4, group A, member 1       | 80        | 194        | 8.6E-36        | 2.4        | 91        | 149        | 2.6E-11        | 1.6        | 17        | 15       | 101105088        | d-dependent nuclear receptor |
| 9830115L13Rik | RIKEN cDNA 9830115L13 gene                            | 79        | 87         | 2.7E-01        | 1.1        | 65        | 107        | 1.6E-08        | 1.6        | 3         | 6        | 38255678         |                              |
| Pdcd10        | Programmed cell death 10                              | 59        | 78         | 5.7E-03        | 1.3        | 62        | 101        | 4.4E-08        | 1.6        | 9         | 3        | 75331629         | other                        |
| Stag1         | Stag1                                                 | 65        | 62         | 6.8E-01        | 1.0        | 53        | 86         | 4.7E-07        | 1.6        | 21        | 9        | 100674014        | other                        |
| Sp1           | Trans-acting transcription factor 1                   | 42        | 45         | 5.6E-01        | 1.1        | 33        | 55         | 6.2E-05        | 1.6        | 12        | 15       | 102262042        | transcription regulator      |
| Gak           | Cyclin G associated kinase                            | 15        | 28         | 6.4E-04        | 1.8        | 26        | 43         | 3.7E-04        | 1.6        | 7         | 5        | 108998548        | kinase                       |
| Soat1         | Sterol O-acyltransferase 1                            | 33        | 25         | 6.0E-02        | 0.7        | 25        | 40         | 5.3E-04        | 1.6        | 0         | 1        | 158360797        | enzyme                       |
| Atp6v1a       | Atp6v1a                                               | 232       | 247        | 2.4E-01        | 1.1        | 173       | 282        | 1.5E-19        | 1.6        | 10        | 16       | 44086213         | transporter                  |

|               |                                                        |            |            |                |            |            |            |                |            |           |           |                        |                                |
|---------------|--------------------------------------------------------|------------|------------|----------------|------------|------------|------------|----------------|------------|-----------|-----------|------------------------|--------------------------------|
| Lsm14a        | LSM14 homolog A (SCD6, S. cerevisiae)                  | 77         | 84         | 3.2E-01        | 1.1        | 85         | 138        | 3.0E-10        | 1.6        | 27        | 7         | 35130096               | other                          |
| Carhsp1       | Calcium regulated heat stable protein 1                | 78         | 88         | 1.7E-01        | 1.1        | 76         | 124        | 1.8E-09        | 1.6        | 2         | 16        | 8658962                | other                          |
| Lass6         | Longevity assurance homolog 6 (S. cerevisiae)          | 41         | 43         | 7.2E-01        | 1.0        | 59         | 97         | 1.1E-07        | 1.6        | 2         | 2         | 68952025               | transcription regulator        |
| Capn2         | Calpain 2                                              | 64         | 72         | 1.9E-01        | 1.1        | 52         | 84         | 8.3E-07        | 1.6        | 9         | 1         | 184397722              | peptidase                      |
| Fads1         | Fatty acid desaturase 1                                | 25         | 35         | 2.0E-02        | 1.4        | 27         | 44         | 3.5E-04        | 1.6        | 4         | 19        | 10271220               | enzyme                         |
| Specc1        | Specc1                                                 | 29         | 44         | 2.0E-03        | 1.5        | 27         | 44         | 3.6E-04        | 1.6        | 1         | 11        | 61952964               | other                          |
| Fbxo28        | F-box protein 28                                       | 23         | 34         | 1.5E-02        | 1.4        | 26         | 42         | 5.0E-04        | 1.6        | 11        | 1         | 184246807              | other                          |
| Ykt6          | YKT6 homolog (S. Cerevisiae)                           | 30         | 44         | 5.0E-03        | 1.5        | 25         | 41         | 5.1E-04        | 1.6        | 14        | 11        | 92656231               | enzyme                         |
| <b>Cdkn1a</b> | <b>Cyclin-dependent kinase inhibitor 1A (P21)</b>      | <b>399</b> | <b>561</b> | <b>5.4E-20</b> | <b>1.4</b> | <b>347</b> | <b>563</b> | <b>1.6E-36</b> | <b>1.6</b> | <b>13</b> | <b>17</b> | <b>29237536</b>        | <b>kinase</b>                  |
| Polr2b        | Polymerase (RNA) II (DNA directed) polypeptide E       | 107        | 109        | 8.1E-01        | 1.0        | 99         | 161        | 1.6E-11        | 1.6        | 37        | 5         | 77778308               | enzyme                         |
| Rin2          | Ras and Rab interactor 2                               | 45         | 82         | 5.9E-09        | 1.8        | 69         | 112        | 2.2E-08        | 1.6        | 10        | 2         | 145713246              | other                          |
| Tmem45a       | Transmembrane protein 45a                              | 38         | 40         | 7.0E-01        | 1.1        | 49         | 79         | 2.2E-06        | 1.6        | 1         | 16        | 56806400               | other                          |
| <b>Fcgr2b</b> | <b>Fc receptor, IgG, low affinity IIb</b>              | <b>71</b>  | <b>67</b>  | <b>5.8E-01</b> | <b>0.9</b> | <b>48</b>  | <b>77</b>  | <b>3.1E-06</b> | <b>1.6</b> | <b>0</b>  | <b>1</b>  | <b>172890721</b>       | <b>transmembrane receptor</b>  |
| Lass2         | Longevity assurance homolog 2 (S. cerevisiae)          | 45         | 55         | 6.9E-02        | 1.2        | 45         | 73         | 4.7E-06        | 1.6        | 15        | 3         | 95127259               | transcription regulator        |
| Prkcd         | Protein kinase C, delta                                | 69         | 53         | 1.2E-02        | 0.8        | 43         | 70         | 8.8E-06        | 1.6        | 4         | 14        | 31408736               | kinase                         |
| Ppp1r10       | Protein phosphatase 1, regulatory subunit 10           | 55         | 73         | 5.4E-03        | 1.3        | 42         | 68         | 1.3E-05        | 1.6        | 11        | 17        | 36090038               | other                          |
| Copg          | Coatomer protein complex, subunit gamma                | 16         | 29         | 3.8E-04        | 1.8        | 32         | 52         | 1.1E-04        | 1.6        | 8         | 6         | 87862475               | transporter                    |
| Tm9sf4        | Transmembrane 9 superfamily protein member 4           | 23         | 21         | 6.0E-01        | 0.9        | 25         | 41         | 6.8E-04        | 1.6        | 8         | 2         | 153035650              | transporter                    |
| Pabpc1        | Poly A binding protein, cytoplasmic 1                  | 495        | 621        | 4.4E-11        | 1.3        | 532        | 856        | 1.8E-53        | 1.6        | 29        | 17        | 26407203               | translation regulator          |
| Ltbp3         | Latent transforming growth factor beta binding pro     | 71         | 99         | 1.5E-04        | 1.4        | 74         | 119        | 9.6E-09        | 1.6        | 14        | 19        | 5758495                | other                          |
| Abce1         | ATP-binding cassette, sub-family E (OABP), mem         | 41         | 49         | 1.5E-01        | 1.2        | 44         | 71         | 8.5E-06        | 1.6        | 15        | 8         | 82208360               | transporter                    |
| Msr2          | Macrophage scavenger receptor 2                        | 48         | 82         | 1.4E-07        | 1.7        | 44         | 70         | 1.1E-05        | 1.6        | 0         | 3         | 87054990               |                                |
| Csf2rb2       | Colony stimulating factor 2 receptor, beta 2, low-a    | 36         | 47         | 4.2E-02        | 1.3        | 41         | 66         | 1.7E-05        | 1.6        | 15        | 78113026  | transmembrane receptor |                                |
| 1300012G16Rik | RIKEN cDNA 1300012G16 gene                             | 40         | 51         | 3.6E-02        | 1.3        | 36         | 58         | 5.2E-05        | 1.6        | 16        | 5         | 120933969              |                                |
| Cdk11b        | Cell division cycle 2-like 1                           | 26         | 37         | 1.6E-02        | 1.4        | 31         | 49         | 2.1E-04        | 1.6        | 11        | 4         | 155023624              | kinase                         |
| Lincr         | Lung-inducible neuralized-related C3HC4 RING d         | 51         | 45         | 3.8E-01        | 0.9        | 30         | 49         | 2.2E-04        | 1.6        | 1         | 1         | 36322251               |                                |
| Gnb21         | Guanine nucleotide binding protein (G protein), be     | 1326       | 1194       | 6.1E-06        | 0.9        | 962        | 1540       | 6.9E-93        | 1.6        | 400       | 15        | 18315183               | enzyme                         |
| Rpsa          | Ribosomal protein SA                                   | 810        | 839        | 2.1E-01        | 1.0        | 850        | 1357       | 5.7E-81        | 1.6        | 301       | 11        | 22286817               | transmembrane receptor         |
| Emp3          | Epithelial membrane protein 3                          | 157        | 279        | 3.0E-25        | 1.8        | 194        | 310        | 5.2E-20        | 1.6        | 0         | 7         | 53174737               | other                          |
| <b>Btg1</b>   | <b>B-cell translocation gene 1, anti-proliferative</b> | <b>124</b> | <b>180</b> | <b>1.3E-08</b> | <b>1.5</b> | <b>139</b> | <b>223</b> | <b>1.0E-14</b> | <b>1.6</b> | <b>9</b>  | <b>20</b> | <b>14943511</b>        | <b>transcription regulator</b> |
| 2410006H16Rik | RIKEN cDNA 2410006H16 gene                             | 201        | 169        | 3.8E-03        | 0.8        | 132        | 212        | 2.7E-14        | 1.6        | 22        | 11        | 62418210               |                                |
| Mtpn          | Myotrophin                                             | 114        | 131        | 5.5E-02        | 1.2        | 124        | 199        | 1.6E-13        | 1.6        | 37        | 6         | 35459143               | transcription regulator        |
| Parp9         | Poly (ADP-ribose) polymerase family, member 9          | 37         | 88         | 1.6E-16        | 2.4        | 62         | 99         | 2.6E-07        | 1.6        | 3         | 16        | 35972174               | other                          |
| Gnaq          | Guanine nucleotide binding protein, alpha q poly       | 80         | 69         | 1.3E-01        | 0.9        | 53         | 86         | 1.3E-06        | 1.6        | 21        | 19        | 16461690               | enzyme                         |
| Stx3          | Syntaxin 3                                             | 38         | 46         | 1.3E-01        | 1.2        | 44         | 71         | 1.1E-05        | 1.6        | 2         | 19        | 11853191               | transporter                    |
| Prkcn         | Protein kinase C, nu                                   | 49         | 53         | 4.1E-01        | 1.1        | 41         | 66         | 2.2E-05        | 1.6        | 14        | 17        | 79348866               | kinase                         |
| 5133401H06Rik | RIKEN cDNA 5133401H06 gene                             | 37         | 30         | 2.0E-01        | 0.8        | 36         | 57         | 8.8E-05        | 1.6        | 0         | 3         | 131022271              |                                |
| Cand1         | Cullin associated and neddylation disassociated 1      | 30         | 41         | 2.3E-02        | 1.4        | 35         | 55         | 9.7E-05        | 1.6        | 5         | 1         | 5314122                | transcription regulator        |
| Ncf2          | Neutrophil cytosolic factor 2                          | 39         | 48         | 7.9E-02        | 1.2        | 27         | 43         | 6.0E-04        | 1.6        | 0         | 13        | 112672714              | enzyme                         |
| Prdx1         | Peroxiredoxin 1                                        | 829        | 840        | 6.4E-01        | 1.0        | 659        | 1048       | 3.9E-62        | 1.6        | 273       | 16        | 48219386               | enzyme                         |
| Kbtbd2        | Kelch repeat and BTB (POZ) domain containing 2         | 79         | 68         | 1.2E-01        | 0.9        | 64         | 101        | 2.3E-07        | 1.6        | 17        | 6         | 56727591               | other                          |
| Tob2          | Transducer of ERBB2, 2                                 | 62         | 55         | 3.1E-01        | 0.9        | 41         | 65         | 3.8E-05        | 1.6        | 28        | 15        | 81679434               | other                          |
| Slu7          | SLU7 splicing factor homolog (S. cerevisiae)           | 44         | 36         | 1.1E-01        | 0.8        | 34         | 54         | 1.7E-04        | 1.6        | 18        | 11        | 43260254               | enzyme                         |
| Mbt1          | Mbt domain containing 1                                | 25         | 38         | 2.7E-03        | 1.5        | 28         | 45         | 5.5E-04        | 1.6        | 8         | 11        | 93806365               | other                          |
| Tspo          | Translocator protein                                   | 164        | 175        | 3.2E-01        | 1.1        | 173        | 273        | 5.7E-17        | 1.6        | 43        | 15        | 83404590               | transmembrane receptor         |
| Olfm13        | Olfactomedin-like 3                                    | 126        | 180        | 3.5E-08        | 1.4        | 163        | 259        | 2.3E-16        | 1.6        | 2         | 3         | 103539870              | other                          |
| Wwtr1         | WW domain containing transcription regulator 1         | 136        | 184        | 2.3E-06        | 1.4        | 151        | 238        | 6.1E-15        | 1.6        | 34        | 3         | 57259932               | transcription regulator        |
| Cd34          | CD34 antigen                                           | 152        | 170        | 8.1E-02        | 1.1        | 131        | 208        | 2.0E-13        | 1.6        | 8         | 1         | 196786727              | other                          |
| Lgals9        | Lectin, galactose binding, soluble 9                   | 91         | 158        | 5.2E-14        | 1.7        | 103        | 163        | 7.1E-11        | 1.6        | 3         | 11        | 78776724               | other                          |
| Twf1          | Twinfilin, actin-binding protein, homolog 1 (Drosop    | 76         | 84         | 2.5E-01        | 1.1        | 74         | 117        | 3.3E-08        | 1.6        | 10        | 15        | 94408434               | kinase                         |
| Zbtb7a        | Zbtb7a                                                 | 63         | 79         | 1.6E-02        | 1.3        | 69         | 109        | 1.3E-07        | 1.6        | 12        | 10        | 80614126               | transcription regulator        |
| Katna1        | Katanin p60 (ATPase-containing) subunit A1             | 50         | 56         | 2.7E-01        | 1.1        | 49         | 78         | 7.5E-06        | 1.6        | 12        | 10        | 7482798                | enzyme                         |
| Sertad1       | SERTA domain containing 1                              | 60         | 71         | 7.8E-02        | 1.2        | 47         | 74         | 1.2E-05        | 1.6        | 6         | 7         | 28274928               | transcription regulator        |
| Sreb2         | Sterol regulatory element binding factor 2             | 28         | 48         | 5.3E-05        | 1.7        | 37         | 59         | 1.0E-04        | 1.6        | 4         | 15        | 82035762               | transcription regulator        |
| Gdf15         | Growth differentiation factor 15                       | 20         | 45         | 1.7E-08        | 2.3        | 36         | 56         | 1.5E-04        | 1.6        | 3         | 8         | 73153582               | growth factor                  |
| Ube2h         | Ubiquitin-conjugating enzyme E2H                       | 35         | 40         | 2.8E-01        | 1.2        | 30         | 47         | 4.9E-04        | 1.6        | 13        | 7         | 46846931               | enzyme                         |
| Mlixp         | MLX interacting protein                                | 27         | 40         | 2.9E-03        | 1.5        | 30         | 47         | 5.0E-04        | 1.6        | 12        | 5         | 123907660              | other                          |
| Ptbp2         | Polypyrimidine tract binding protein 2                 | 39         | 43         | 4.2E-01        | 1.1        | 28         | 44         | 7.4E-04        | 1.6        | 14        | 3         | 119422006              | other                          |
| Dnaja1        | DnaJ (Hsp40) homolog, subfamily A, member 1            | 397        | 366        | 5.6E-02        | 0.9        | 232        | 364        | 1.2E-21        | 1.6        | 38        | 7         | 148077674              | other                          |
| Atp1b3        | ATPase, Na+/K+ transporting, beta 3 polypeptide        | 158        | 220        | 2.4E-08        | 1.4        | 176        | 276        | 9.6E-17        | 1.6        | 26        | 9         | 96233444               | transporter                    |
| Axud1         | AXIN1 up-regulated 1                                   | 273        | 272        | 9.5E-01        | 1.0        | 173        | 272        | 1.5E-16        | 1.6        | 13        | 9         | 119880603              | other                          |
| Ppp2ca        | Protein phosphatase 2 (formerly 2A), catalytic sub     | 261        | 227        | 9.2E-03        | 0.9        | 170        | 268        | 1.8E-16        | 1.6        | 103       | 11        | 51935828               | phosphatase                    |
| Csf2rb        | Colony stimulating factor 2 receptor, beta, low-affi   | 49         | 71         | 3.4E-04        | 1.5        | 65         | 102        | 3.6E-07        | 1.6        | 0         | 15        | 78181397               | transmembrane receptor         |
| Fcna          | Ficolin A                                              | 51         | 64         | 3.0E-02        | 1.3        | 50         | 78         | 9.3E-06        | 1.6        | 0         | 2         | 25480316               |                                |
| Npdc1         | Neural proliferation, differentiation and control gen  | 47         | 47         | 9.6E-01        | 1.0        | 45         | 70         | 2.8E-05        | 1.6        | 9         | 2         | 25264959               | other                          |
| Cldn5         | Claudin 5                                              | 36         | 94         | 1.2E-20        | 2.6        | 31         | 49         | 4.5E-04        | 1.6        | 1         | 16        | 18777855               | other                          |
| Mmrn2         | Mmrn2                                                  | 55         | 56         | 8.5E-01        | 1.0        | 31         | 48         | 4.6E-04        | 1.6        | 14        | 14        | 35217347               | other                          |
| Nav1          | Neuron navigator 1                                     | 26         | 41         | 1.3E-03        | 1.6        | 29         | 46         | 6.6E-04        | 1.6        | 3         | 1         | 137335871              | enzyme                         |
| Rg9mtd1       | RNA (guanine-9-) methyltransferase domain cont         | 37         | 43         | 2.9E-01        | 1.1        | 29         | 45         | 6.8E-04        | 1.6        | 19        | 16        | 56033972               | other                          |

|                |                                                     |            |            |                |            |            |            |                |            |           |          |                  |                         |
|----------------|-----------------------------------------------------|------------|------------|----------------|------------|------------|------------|----------------|------------|-----------|----------|------------------|-------------------------|
| Ctsl           | Cathepsin L                                         | 931        | 826        | 1.6E-05        | 0.9        | 829        | 1293       | 1.0E-70        | 1.6        | 134       | 13       | 64465262         | peptidase               |
| Arcp1b         | Actin related protein 2/3 complex, subunit 1B       | 346        | 415        | 1.2E-05        | 1.2        | 474        | 739        | 3.8E-41        | 1.6        | 12        | 15       | 40370224         | other                   |
| Sep15          | Selenoprotein                                       | 186        | 190        | 7.7E-01        | 1.0        | 172        | 269        | 6.4E-16        | 1.6        | 46        | 3        | 144260348        |                         |
| Gpm6b          | Glycoprotein m6b                                    | 101        | 121        | 1.8E-02        | 1.2        | 120        | 187        | 1.3E-11        | 1.6        | 4         | 20       | 162826548        | other                   |
| Lgmn           | Legumain                                            | 144        | 95         | 6.2E-08        | 0.7        | 102        | 158        | 5.3E-10        | 1.6        | 49        | 12       | 103632807        | peptidase               |
| <b>Bax</b>     | <b>Bcl2-associated X protein</b>                    | <b>47</b>  | <b>68</b>  | <b>6.3E-04</b> | <b>1.4</b> | <b>70</b>  | <b>110</b> | <b>1.9E-07</b> | <b>1.6</b> | <b>10</b> | <b>7</b> | <b>52717302</b>  | <b>other</b>            |
| RP23-285D3.2   | Heat shock protein 1, alpha pseudogene              | 169        | 88         | 1.1E-17        | 0.5        | 63         | 98         | 1.0E-06        | 1.6        | 20        | 11       | 77108741         |                         |
| Baiap2         | Brain-specific angiogenesis inhibitor 1-associated  | 54         | 57         | 6.6E-01        | 1.1        | 61         | 95         | 1.6E-06        | 1.6        | 3         | 11       | 119868034        | kinase                  |
| Lipa           | Lipa                                                | 75         | 77         | 7.4E-01        | 1.0        | 61         | 95         | 1.6E-06        | 1.6        | 9         | 19       | 34567162         | enzyme                  |
| Ncor2          | Nuclear receptor co-repressor 2                     | 45         | 61         | 5.0E-03        | 1.4        | 51         | 80         | 1.1E-05        | 1.6        | 21        | 5        | 125497524        | transcription regulator |
| Gapvd1         | GTPase activating protein and VPS9 domains 1        | 26         | 44         | 1.2E-04        | 1.7        | 33         | 51         | 3.9E-04        | 1.6        | 10        | 2        | 34532766         | other                   |
| Mdm2           | Transformed mouse 3T3 cell double minute 2          | 196        | 208        | 3.0E-01        | 1.1        | 147        | 229        | 1.1E-13        | 1.6        | 30        | 10       | 117126271        | transcription regulator |
| Npc2           | Niemann Pick type C2                                | 115        | 175        | 3.8E-10        | 1.5        | 144        | 223        | 3.5E-13        | 1.6        | 7         | 12       | 86097389         | other                   |
| Nap111         | Nucleosome assembly protein 1-like 1                | 119        | 142        | 1.2E-02        | 1.2        | 117        | 181        | 6.7E-11        | 1.6        | 54        | 10       | 110933563        | other                   |
| Ddx17          | DEAD (Asp-Glu-Ala-Asp) box polypeptide 17           | 56         | 82         | 1.2E-04        | 1.5        | 70         | 109        | 3.0E-07        | 1.6        | 23        | 15       | 79358731         | enzyme                  |
| C1r            | Complement component 1, r subcomponent              | 42         | 84         | 8.3E-12        | 2.0        | 60         | 94         | 2.1E-06        | 1.6        | 0         | 6        | 124472736        | peptidase               |
| Impdh2         | Inosine 5'-phosphate dehydrogenase 2                | 86         | 103        | 2.9E-02        | 1.2        | 58         | 90         | 4.0E-06        | 1.6        | 23        | 9        | 108467661        | enzyme                  |
| Stx12          | Syntaxin 12                                         | 49         | 59         | 1.0E-01        | 1.2        | 47         | 72         | 3.1E-05        | 1.6        | 19        | 4        | 132410042        | other                   |
| Eif4e2         | Eukaryotic translation initiation factor 4E member  | 37         | 57         | 3.1E-04        | 1.5        | 43         | 67         | 6.6E-05        | 1.6        | 12        | 1        | 89124562         | translation regulator   |
| Coro1c         | Coronin, actin binding protein 1C                   | 26         | 33         | 1.1E-01        | 1.3        | 36         | 55         | 2.5E-04        | 1.6        | 4         | 5        | 114292760        | other                   |
| Ifi27          | Interferon, alpha-inducible protein 27              | 65         | 99         | 3.0E-06        | 1.5        | 107        | 166        | 4.4E-10        | 1.5        | 1         | 12       | 104681163        | other                   |
| <b>B4galT1</b> | <b>UDP-Gal:betaGlcNAc beta 1,4-galactosyltrans</b>  | <b>143</b> | <b>131</b> | <b>2.1E-01</b> | <b>0.9</b> | <b>95</b>  | <b>146</b> | <b>7.2E-09</b> | <b>1.5</b> | <b>55</b> | <b>4</b> | <b>40751766</b>  | <b>enzyme</b>           |
| Tmem16f        | Transmembrane protein 16F                           | 76         | 78         | 8.3E-01        | 1.0        | 80         | 123        | 8.9E-08        | 1.5        | 6         | 15       | 95805432         | other                   |
| St3gal1        | ST3 beta-galactoside alpha-2,3-sialyltransferase 1  | 83         | 99         | 4.4E-02        | 1.2        | 72         | 111        | 4.3E-07        | 1.5        | 5         | 15       | 66934738         | enzyme                  |
| Itih5          | Itih5                                               | 54         | 80         | 1.2E-04        | 1.5        | 65         | 100        | 1.5E-06        | 1.5        | 1         | 2        | 10178029         | other                   |
| Slc7a11        | Solute carrier family 7 (cationic amino acid transp | 44         | 43         | 8.9E-01        | 1.0        | 59         | 91         | 3.8E-06        | 1.5        | 0         | 3        | 50169248         | transporter             |
| Brd1           | Bromodomain containing 1                            | 54         | 63         | 1.3E-01        | 1.2        | 54         | 83         | 1.1E-05        | 1.5        | 21        | 15       | 88517852         | other                   |
| Bcor           | Bcl6 interacting corepressor                        | 66         | 66         | 9.7E-01        | 1.0        | 49         | 75         | 2.7E-05        | 1.5        | 8         | 20       | 11614513         | transcription regulator |
| 9130404D14Rik  | RIKEN cDNA 9130404D14 gene                          | 90         | 76         | 6.3E-02        | 0.8        | 43         | 67         | 8.3E-05        | 1.5        | 2         | 2        | 32780664         |                         |
| Jhdm1d         | Jumonji C domain-containing histone demethylase     | 51         | 60         | 1.3E-01        | 1.2        | 43         | 66         | 8.5E-05        | 1.5        | 11        | 6        | 39087085         | other                   |
| Git2           | G protein-coupled receptor kinase-interactor 2      | 61         | 61         | 9.7E-01        | 1.0        | 42         | 65         | 9.1E-05        | 1.5        | 12        | 5        | 115179646        | other                   |
| Slc5a3         | Slc5a3                                              | 26         | 26         | 8.8E-01        | 1.0        | 30         | 47         | 9.9E-04        | 1.5        | 3         | 16       | 92087531         | transporter             |
| Pcbp2          | Poly(rC) binding protein 2                          | 788        | 581        | 7.2E-22        | 0.7        | 530        | 811        | 6.4E-42        | 1.5        | 368       | 15       | 102329228        | other                   |
| Tloc1          | Translocation protein 1                             | 149        | 206        | 1.4E-07        | 1.4        | 197        | 301        | 2.0E-16        | 1.5        | 35        | 3        | 30699130         | transporter             |
| Bhlhb2         | Basic helix-loop-helix domain containing, class B2  | 86         | 226        | 3.9E-47        | 2.6        | 159        | 242        | 1.8E-13        | 1.5        | 20        | 6        | 108616099        | transcription regulator |
| Vcam1          | Vascular cell adhesion molecule 1                   | 201        | 148        | 1.4E-06        | 0.7        | 148        | 227        | 7.9E-13        | 1.5        | 0         | 3        | 115826441        | other                   |
| Rnf130         | Ring finger protein 130                             | 158        | 154        | 7.0E-01        | 1.0        | 114        | 173        | 4.3E-10        | 1.5        | 33        | 11       | 49918141         | peptidase               |
| Zdnhc20        | Zinc finger, DHHC domain containing 20              | 86         | 85         | 9.6E-01        | 1.0        | 98         | 150        | 6.9E-09        | 1.5        | 11        | 14       | 58451890         | other                   |
| 2310008M10Rik  | RIKEN cDNA 2310008M10 gene                          | 60         | 59         | 8.4E-01        | 1.0        | 86         | 132        | 5.6E-08        | 1.5        | 29        | 3        | 130398877        |                         |
| Phldb1         | Pleckstrin homology-like domain, family B, membe    | 81         | 84         | 6.4E-01        | 1.0        | 72         | 110        | 6.8E-07        | 1.5        | 17        | 9        | 44494871         | other                   |
| Cpt1a          | Carnitine palmitoyltransferase 1a, liver            | 54         | 58         | 4.9E-01        | 1.1        | 58         | 89         | 6.3E-06        | 1.5        | 19        | 19       | 3385681          | enzyme                  |
| Acsl4          | Acyl-CoA synthetase long-chain family member 4      | 54         | 59         | 4.2E-01        | 1.1        | 54         | 83         | 1.4E-05        | 1.5        | 2         | 20       | 138752988        | enzyme                  |
| Banf1          | Barrier to autointegration factor 1                 | 33         | 43         | 4.0E-02        | 1.3        | 52         | 80         | 2.1E-05        | 1.5        | 16        | 13       | 14134241         | other                   |
| Ubn1           | Ubinuclein 1                                        | 52         | 48         | 5.3E-01        | 0.9        | 42         | 64         | 1.5E-04        | 1.5        | 7         | 16       | 5086150          | transcription regulator |
| Pscd2          | Pleckstrin homology, Sec7 and coiled-coil domain    | 42         | 36         | 2.6E-01        | 0.9        | 31         | 48         | 9.2E-04        | 1.5        | 20        | 7        | 53062989         | other                   |
| Junb           | Jun-B oncogene                                      | 541        | 662        | 1.2E-09        | 1.2        | 341        | 518        | 9.7E-27        | 1.5        | 88        | 8        | 87501121         | transcription regulator |
| Cybb           | Cybb                                                | 273        | 305        | 1.9E-02        | 1.1        | 256        | 390        | 1.3E-20        | 1.5        | 0         | 20       | 9012735          | enzyme                  |
| Scepe1         | Serine carboxypeptidase 1                           | 167        | 205        | 6.5E-04        | 1.2        | 177        | 270        | 9.1E-15        | 1.5        | 7         | 11       | 88785333         | peptidase               |
| Trex1          | Three prime repair exonuclease 1                    | 124        | 203        | 8.2E-15        | 1.6        | 171        | 261        | 2.8E-14        | 1.5        | 3         | 9        | 108960694        | enzyme                  |
| Fabp5          | Fatty acid binding protein 5, epidermal             | 130        | 194        | 4.3E-10        | 1.5        | 150        | 229        | 1.1E-12        | 1.5        | 35        | 9        | 57332332         | transporter             |
| Ptp4a2         | Protein tyrosine phosphatase 4a2                    | 153        | 162        | 3.3E-01        | 1.1        | 141        | 214        | 6.7E-12        | 1.5        | 74        | 4        | 129516865        | phosphatase             |
| Dlgap4         | Discs, large homolog-associated protein 4 (Drosop   | 103        | 107        | 6.1E-01        | 1.0        | 104        | 158        | 4.4E-09        | 1.5        | 26        | 2        | 156587592        | other                   |
| E130112L23Rik  | RIKEN cDNA E130112L23 gene                          | 51         | 47         | 4.5E-01        | 0.9        | 53         | 80         | 2.5E-05        | 1.5        | 7         | 14       | 52625192         |                         |
| Adar           | Adenosine deaminase, RNA-specific                   | 56         | 65         | 1.4E-01        | 1.2        | 49         | 75         | 5.2E-05        | 1.5        | 2         | 3        | 89557162         | enzyme                  |
| Atp6v0c        | ATPase, H+ transporting, lysosomal V0 subunit C     | 609        | 846        | 1.4E-27        | 1.4        | 778        | 1176       | 6.3E-57        | 1.5        | 122       | 6        | 37756893         | transporter             |
| Ly6e           | Lymphocyte antigen 6 complex, locus E               | 137        | 237        | 6.1E-20        | 1.7        | 186        | 281        | 1.3E-14        | 1.5        | 22        | 15       | 74789632         | other                   |
| Fcer1g         | Fc receptor, IgE, high affinity I, gamma polypeptid | 140        | 214        | 2.4E-12        | 1.5        | 166        | 250        | 3.2E-13        | 1.5        | 0         | 1        | 173159702        | transmembrane receptor  |
| <b>Lamc1</b>   | <b>Laminin, gamma 1</b>                             | <b>150</b> | <b>140</b> | <b>2.8E-01</b> | <b>0.9</b> | <b>117</b> | <b>178</b> | <b>6.2E-10</b> | <b>1.5</b> | <b>10</b> | <b>1</b> | <b>155066235</b> | <b>other</b>            |
| Il33           | Interleukin 33                                      | 78         | 52         | 1.2E-04        | 0.7        | 77         | 116        | 7.2E-07        | 1.5        | 0         | 19       | 30034829         | other                   |
| Irf8           | Interferon regulatory factor 8                      | 67         | 88         | 2.9E-03        | 1.3        | 71         | 108        | 1.4E-06        | 1.5        | 1         | 8        | 123280482        | transcription regulator |
| Sp3            | Trans-acting transcription factor 3                 | 79         | 87         | 3.2E-01        | 1.1        | 69         | 105        | 2.1E-06        | 1.5        | 29        | 2        | 72774860         | transcription regulator |
| Nadk           | NAD kinase                                          | 73         | 74         | 8.7E-01        | 1.0        | 63         | 95         | 5.4E-06        | 1.5        | 16        | 4        | 154964982        | kinase                  |
| Twist1         | Twist gene homolog 1 (Drosophila)                   | 48         | 39         | 1.3E-01        | 0.8        | 58         | 88         | 1.3E-05        | 1.5        | 2         | 12       | 34644576         | transcription regulator |
| Adss           | Adenylosuccinate synthetase, non muscle             | 53         | 56         | 5.3E-01        | 1.1        | 53         | 80         | 3.8E-05        | 1.5        | 5         | 1        | 179693818        | enzyme                  |
| Dclk1          | Dclk1                                               | 33         | 42         | 5.5E-02        | 1.3        | 53         | 80         | 3.9E-05        | 1.5        | 0         | 3        | 55275216         | kinase                  |
| Adam10         | Adam10                                              | 38         | 44         | 2.2E-01        | 1.2        | 51         | 77         | 5.8E-05        | 1.5        | 17        | 9        | 70627801         | peptidase               |
| BC006779       | CDNA sequence BC006779                              | 34         | 53         | 2.3E-04        | 1.6        | 46         | 69         | 1.4E-04        | 1.5        | 3         | 2        | 180962602        | transcription regulator |
| Spg21          | Spastic paraplegia 21 homolog (human)               | 43         | 34         | 8.2E-02        | 0.8        | 42         | 63         | 2.4E-04        | 1.5        | 10        | 9        | 65335032         | enzyme                  |
| Nedd9          | Neural precursor cell expressed, developmentally    | 52         | 59         | 1.8E-01        | 1.2        | 36         | 54         | 6.3E-04        | 1.5        | 8         | 13       | 41405720         | other                   |

|               |                                                      |      |      |          |     |      |      |         |     |     |    |           |                           |
|---------------|------------------------------------------------------|------|------|----------|-----|------|------|---------|-----|-----|----|-----------|---------------------------|
| Cxcl1         | Chemokine (C-X-C motif) ligand 1                     | 7155 | 8316 | 2.8E-59  | 1.2 | 6564 | 9867 | 0.0E+00 | 1.5 | 4   | 5  | 91321900  | cytokine                  |
| Dynll1        | Dynein light chain LC8-type 1                        | 333  | 310  | 1.3E-01  | 0.9 | 288  | 433  | 2.0E-21 | 1.5 | 38  | 19 | 28837644  | other                     |
| Rhoa          | Ras homolog gene family, member A                    | 268  | 268  | 9.8E-01  | 1.0 | 236  | 354  | 1.4E-17 | 1.5 | 132 | 9  | 108239664 | enzyme                    |
| 3230401D17Rik | RIKEN cDNA 3230401D17 gene                           | 83   | 113  | 1.4E-04  | 1.4 | 93   | 140  | 7.7E-08 | 1.5 | 9   | 20 | 7612560   |                           |
| Gnb2          | Guanine nucleotide binding protein, beta 2           | 65   | 87   | 1.9E-03  | 1.3 | 70   | 105  | 3.0E-06 | 1.5 | 29  | 5  | 137969482 | enzyme                    |
| Enc1          | Ectodermal-neural cortex 1                           | 57   | 61   | 4.9E-01  | 1.1 | 57   | 86   | 2.1E-05 | 1.5 | 2   | 13 | 98022881  | peptidase                 |
| Wdsof1        | WD repeats and SOF domain containing 1               | 42   | 42   | 9.8E-01  | 1.0 | 35   | 53   | 8.5E-04 | 1.5 | 9   | 15 | 38976706  | other                     |
| Trip12        | Thyroid hormone receptor interactor 12               | 103  | 80   | 4.3E-03  | 0.8 | 63   | 94   | 1.3E-05 | 1.5 | 44  | 1  | 84721106  | enzyme                    |
| Uhrf2         | Ubiquitin-like, containing PHD and RING finger do    | 58   | 68   | 1.3E-01  | 1.2 | 62   | 93   | 1.7E-05 | 1.5 | 14  | 19 | 30167997  | enzyme                    |
| Arf3          | ADP-ribosylation factor 3                            | 49   | 44   | 3.3E-01  | 0.9 | 45   | 67   | 2.4E-04 | 1.5 | 9   | 15 | 98568146  | enzyme                    |
| Akr1a4        | Aldo-keto reductase family 1, member A4 (aldehyd     | 94   | 161  | 1.2E-13  | 1.7 | 169  | 252  | 1.6E-12 | 1.5 | 38  | 4  | 116309114 |                           |
| Adam9         | A disintegrin and metallopeptidase domain 9 (met     | 80   | 78   | 8.3E-01  | 1.0 | 91   | 136  | 2.2E-07 | 1.5 | 17  | 8  | 26060482  | peptidase                 |
| Slc39a6       | Solute carrier family 39 (metal ion transporter), me | 69   | 63   | 4.0E-01  | 0.9 | 54   | 80   | 8.5E-05 | 1.5 | 3   | 18 | 24738582  | transporter               |
| Atp6v0d1      | ATPase, H+ transporting, lysosomal V0 subunit D      | 27   | 53   | 9.6E-08  | 2.0 | 40   | 60   | 6.8E-04 | 1.5 | 7   | 8  | 108048528 | transporter               |
| Sec61a1       | Sec61 alpha 1 subunit (S. cerevisiae)                | 162  | 177  | 1.3E-01  | 1.1 | 207  | 304  | 3.2E-14 | 1.5 | 29  | 6  | 88453620  | transporter               |
| Myd116        | Myeloid differentiation primary response gene 116    | 171  | 219  | 2.9E-05  | 1.3 | 131  | 193  | 1.4E-09 | 1.5 | 21  | 7  | 52778511  |                           |
| Rhoj          | Ras homolog gene family, member J                    | 108  | 105  | 8.1E-01  | 1.0 | 106  | 155  | 5.3E-08 | 1.5 | 7   | 12 | 76502363  | enzyme                    |
| Tbc1d9        | Tbc1d9                                               | 75   | 82   | 3.5E-01  | 1.1 | 69   | 102  | 1.2E-05 | 1.5 | 29  | 8  | 85694748  | other                     |
| Ifi44         | Interferon-induced protein 44                        | 41   | 63   | 9.5E-05  | 1.6 | 67   | 98   | 1.5E-05 | 1.5 | 0   | 3  | 151394735 | other                     |
| Gprc5b        | G protein-coupled receptor, family C, group 5, me    | 35   | 52   | 7.9E-04  | 1.5 | 46   | 68   | 3.4E-04 | 1.5 | 6   | 7  | 126115623 | -protein coupled receptor |
| Id3           | Inhibitor of DNA binding 3                           | 854  | 712  | 7.1E-10  | 0.8 | 532  | 776  | 1.7E-32 | 1.5 | 58  | 4  | 135701239 | transcription regulator   |
| Mex3c         | Mex3 homolog C (C. elegans)                          | 132  | 106  | 5.2E-03  | 0.8 | 98   | 144  | 2.8E-07 | 1.5 | 11  | 18 | 73751876  | other                     |
| H13           | Histocompatibility C (C. elegans)                    | 69   | 89   | 5.1E-03  | 1.3 | 91   | 134  | 6.4E-07 | 1.5 | 17  | 2  | 152530748 |                           |
| Stx5a         | Syntaxin 5A                                          | 42   | 51   | 8.7E-02  | 1.2 | 54   | 78   | 1.7E-04 | 1.5 | 16  | 19 | 8830085   | transporter               |
| Wdr40a        | WD repeat domain 40A                                 | 43   | 46   | 5.6E-01  | 1.1 | 49   | 72   | 2.5E-04 | 1.5 | 12  | 4  | 41238744  |                           |
| Phf3          | PHD finger protein 3                                 | 54   | 56   | 6.4E-01  | 1.1 | 48   | 70   | 3.4E-04 | 1.5 | 13  | 1  | 30860038  | other                     |
| Spin1         | Spindlin 1                                           | 53   | 56   | 6.5E-01  | 1.1 | 41   | 60   | 9.7E-04 | 1.5 | 16  | 13 | 51247190  | other                     |
| Rap1b         | RAS related protein 1b                               | 675  | 739  | 2.8E-03  | 1.1 | 489  | 710  | 1.7E-29 | 1.5 | 29  | 10 | 117251868 | enzyme                    |
| Cstb          | Cystatin B                                           | 509  | 562  | 4.5E-03  | 1.1 | 462  | 669  | 1.7E-27 | 1.5 | 17  | 10 | 77890110  | other                     |
| S100a10       | S100 calcium binding protein A10 (calpactin)         | 157  | 301  | 2.5E-33  | 1.9 | 321  | 464  | 1.9E-19 | 1.5 | 3   | 3  | 93368302  | other                     |
| Syn3          | Syn3                                                 | 145  | 117  | 2.4E-03  | 0.8 | 117  | 170  | 3.0E-08 | 1.5 | 46  | 10 | 85812134  | other                     |
| Zfp3612       | Zinc finger protein 36, C3H type-like 2              | 121  | 87   | 5.4E-05  | 0.7 | 109  | 158  | 1.4E-07 | 1.5 | 9   | 17 | 84583572  | transcription regulator   |
| Ythdf2        | YTH domain family 2                                  | 101  | 123  | 8.6E-03  | 1.2 | 93   | 136  | 8.0E-07 | 1.5 | 22  | 20 | 67773423  | other                     |
| Srrm2         | Serine/arginine repetitive matrix 2                  | 105  | 92   | 1.1E-01  | 0.9 | 81   | 117  | 4.5E-06 | 1.5 | 38  | 17 | 23961256  | other                     |
| Znfx1         | Zinc finger, NFX1-type containing 1                  | 80   | 65   | 3.9E-02  | 0.8 | 75   | 108  | 1.4E-05 | 1.5 | 7   | 2  | 166861437 | transcription regulator   |
| Rgs10         | Regulator of G-protein signalling 10                 | 72   | 98   | 4.1E-04  | 1.4 | 64   | 94   | 4.3E-05 | 1.5 | 1   | 7  | 135517203 | other                     |
| Senp2         | SUMO/sentrin specific peptidase 2                    | 63   | 75   | 5.8E-02  | 1.2 | 59   | 85   | 1.1E-04 | 1.5 | 10  | 16 | 22047712  | peptidase                 |
| Rps3          | Ribosomal protein S3                                 | 663  | 801  | 3.1E-10  | 1.2 | 674  | 973  | 1.6E-38 | 1.4 | 155 | 3  | 51515950  | other                     |
| Vim           | Vimentin                                             | 1314 | 570  | 6.4E-189 | 0.4 | 509  | 735  | 1.7E-29 | 1.4 | 21  | 2  | 13501749  | other                     |
| OTTMUSG0000C  | Predicted gene, OTTMUSG00000000971                   | 148  | 246  | 2.3E-18  | 1.7 | 218  | 314  | 2.1E-13 | 1.4 | 1   | 11 | 83519612  |                           |
| Actn4         | Actinin alpha 4                                      | 109  | 157  | 2.9E-07  | 1.4 | 133  | 192  | 7.7E-09 | 1.4 | 26  | 7  | 29678908  | other                     |
| Mbd2          | Methyl-CpG binding domain protein 2                  | 108  | 113  | 5.2E-01  | 1.1 | 94   | 135  | 1.8E-06 | 1.4 | 53  | 18 | 70782339  | transcription regulator   |
| Rab5c         | RAB5C, member RAS oncogene family                    | 185  | 204  | 8.7E-02  | 1.1 | 190  | 271  | 2.6E-11 | 1.4 | 30  | 11 | 100576628 | enzyme                    |
| Dek           | DEK oncogene (DNA binding)                           | 107  | 121  | 8.6E-02  | 1.1 | 105  | 150  | 6.5E-07 | 1.4 | 31  | 20 | 39037821  | transcription regulator   |
| Tor3a         | Torsin family 3, member A                            | 114  | 125  | 2.4E-01  | 1.1 | 104  | 149  | 8.5E-07 | 1.4 | 3   | 1  | 158585178 | enzyme                    |
| Sept11        | Septin 11                                            | 109  | 114  | 5.3E-01  | 1.1 | 93   | 133  | 2.8E-06 | 1.4 | 5   | 5  | 93603780  | other                     |
| Folr2         | Folate receptor 2 (fetal)                            | 112  | 167  | 8.3E-09  | 1.5 | 76   | 109  | 1.9E-05 | 1.4 | 0   | 7  | 108988564 | transporter               |
| Sod3          | Superoxide dismutase 3, extracellular                | 73   | 113  | 2.7E-07  | 1.5 | 75   | 108  | 2.4E-05 | 1.4 | 4   | 5  | 52760599  | enzyme                    |
| Al314027      | Expressed sequence Al314027                          | 59   | 73   | 2.6E-02  | 1.3 | 66   | 94   | 8.4E-05 | 1.4 | 13  | 1  | 52220625  |                           |
| Purb          | Purine rich element binding protein B                | 68   | 70   | 7.9E-01  | 1.0 | 55   | 79   | 2.7E-04 | 1.4 | 14  | 11 | 6367967   | transcription regulator   |
| Rpl8          | Ribosomal protein L8                                 | 808  | 795  | 5.8E-01  | 1.0 | 718  | 1022 | 8.5E-38 | 1.4 | 259 | 15 | 76736744  | other                     |
| Eif4h         | Eukaryotic translation initiation factor 4H          | 211  | 221  | 4.0E-01  | 1.1 | 197  | 280  | 2.8E-11 | 1.4 | 90  | 5  | 135095963 | translation regulator     |
| Copb1         | Coatomer protein complex, subunit beta 1             | 84   | 98   | 5.7E-02  | 1.2 | 101  | 143  | 1.4E-06 | 1.4 | 26  | 7  | 121359277 | transporter               |
| Cpd           | Carboxypeptidase D                                   | 84   | 96   | 1.2E-01  | 1.1 | 98   | 139  | 2.2E-06 | 1.4 | 23  | 11 | 76592093  | peptidase                 |
| Nptrn         | Neuroplastin                                         | 66   | 112  | 6.6E-10  | 1.7 | 82   | 117  | 1.3E-05 | 1.4 | 27  | 9  | 58500593  | other                     |
| Ski           | Sloan-Kettering viral oncogene homolog               | 109  | 106  | 7.4E-01  | 1.0 | 79   | 112  | 2.1E-05 | 1.4 | 19  | 4  | 154529727 | other                     |
| Dnajb1        | DnaJ (Hsp40) homolog, subfamily B, member 1          | 100  | 109  | 2.5E-01  | 1.1 | 78   | 111  | 2.4E-05 | 1.4 | 26  | 8  | 86133997  | other                     |
| Aof2          | Amine oxidase (flavin containing) domain 2           | 79   | 103  | 1.7E-03  | 1.3 | 79   | 111  | 2.7E-05 | 1.4 | 19  | 4  | 136106668 | other                     |
| Bcl3          | B-cell leukemia/lymphoma 3                           | 79   | 90   | 1.5E-01  | 1.1 | 53   | 75   | 5.1E-04 | 1.4 | 0   | 7  | 20394082  | transcription regulator   |
| Rps3a         | Ribosomal protein S3a                                | 727  | 1335 | 1.0E-125 | 1.8 | 1050 | 1479 | 4.0E-51 | 1.4 | 255 | 13 | 109461490 | other                     |
| Tmepai        | Transmembrane, prostate androgen induced RNA         | 321  | 478  | 1.3E-22  | 1.5 | 412  | 580  | 3.5E-21 | 1.4 | 20  | 2  | 173053164 | other                     |
| Isg15         | ISG15 ubiquitin-like modifier                        | 224  | 420  | 2.8E-43  | 1.9 | 367  | 516  | 1.1E-18 | 1.4 | 1   | 4  | 155573792 | other                     |
| Pttg1ip       | Pituitary tumor-transforming 1 interacting protein   | 203  | 229  | 3.1E-02  | 1.1 | 222  | 313  | 4.0E-12 | 1.4 | 61  | 10 | 77061394  | other                     |
| Tmem50a       | Transmembrane protein 50A                            | 130  | 145  | 1.2E-01  | 1.1 | 116  | 163  | 6.8E-07 | 1.4 | 41  | 4  | 134454097 | other                     |
| Slc44a1       | Slc44a1                                              | 109  | 119  | 2.4E-01  | 1.1 | 111  | 156  | 1.0E-06 | 1.4 | 16  | 4  | 53580509  | transporter               |
| Foxc2         | Forkhead box C2                                      | 90   | 75   | 4.4E-02  | 0.8 | 80   | 113  | 2.9E-05 | 1.4 | 0   | 8  | 123642651 | transcription regulator   |
| Ep300         | E1A binding protein p300                             | 62   | 62   | 9.8E-01  | 1.0 | 69   | 98   | 9.5E-05 | 1.4 | 18  | 15 | 81482395  | transcription regulator   |
| D11Wsu99e     | DNA segment, Chr 11, Wayne State University 99       | 62   | 70   | 1.9E-01  | 1.1 | 67   | 95   | 1.1E-04 | 1.4 | 15  | 11 | 113524625 |                           |
| Cd97          | CD97 antigen                                         | 52   | 70   | 4.9E-03  | 1.3 | 56   | 79   | 4.6E-04 | 1.4 | 4   | 8  | 86247758  | -protein coupled receptor |

|               |                                                       |             |             |                 |            |             |             |                 |            |             |           |                  |                                |
|---------------|-------------------------------------------------------|-------------|-------------|-----------------|------------|-------------|-------------|-----------------|------------|-------------|-----------|------------------|--------------------------------|
| Eif2s2        | Eukaryotic translation initiation factor 2, subunit 2 | 396         | 409         | 4.3E-01         | 1.0        | 413         | 577         | 4.0E-20         | 1.4        | 111         | 8         | 53282408         | translation regulator          |
| Map2k3        | Mitogen activated protein kinase kinase 3             | 396         | 373         | 1.4E-01         | 0.9        | 328         | 459         | 1.7E-16         | 1.4        | 54          | 11        | 60766016         | kinase                         |
| Lrp1          | Low density lipoprotein receptor-related protein 1    | 230         | 232         | 8.6E-01         | 1.0        | 192         | 269         | 2.9E-10         | 1.4        | 2           | 10        | 126975491        | transmembrane receptor         |
| Map4k4        | Mitogen-activated protein kinase kinase kinase 4      | 95          | 146         | 5.0E-09         | 1.5        | 148         | 208         | 2.5E-08         | 1.4        | 35          | 1         | 40082753         | kinase                         |
| Actr2         | ARP2 actin-related protein 2 homolog (yeast)          | 167         | 156         | 3.0E-01         | 0.9        | 140         | 196         | 6.3E-08         | 1.4        | 44          | 11        | 19962750         | other                          |
| Tmod3         | Tropomodulin 3                                        | 90          | 88          | 7.7E-01         | 1.0        | 73          | 102         | 1.2E-04         | 1.4        | 8           | 9         | 75346056         | other                          |
| 2810403A07Rik | RIKEN cDNA 2810403A07 gene                            | 65          | 95          | 3.5E-05         | 1.5        | 71          | 99          | 1.4E-04         | 1.4        | 29          | 3         | 88516605         |                                |
| Der1          | Der1-like domain family, member 1                     | 76          | 75          | 9.1E-01         | 1.0        | 67          | 95          | 1.6E-04         | 1.4        | 30          | 15        | 57701433         | other                          |
| Smcr8         | Smith-Magenis syndrome chromosome region, ca          | 73          | 62          | 1.1E-01         | 0.9        | 59          | 82          | 5.4E-04         | 1.4        | 9           | 11        | 60601542         | other                          |
| Cnt1          | Cyclin T1                                             | 59          | 57          | 6.9E-01         | 1.0        | 58          | 81          | 5.7E-04         | 1.4        | 12          | 15        | 98369517         | transcription regulator        |
| Arpc2         | Actin related protein 2/3 complex, subunit 2          | 351         | 392         | 8.9E-03         | 1.1        | 333         | 463         | 4.7E-16         | 1.4        | 120         | 1         | 74314442         | other                          |
| Sfrs7         | Splicing factor, arginine/serine-rich 7               | 164         | 202         | 4.8E-04         | 1.2        | 160         | 222         | 2.2E-08         | 1.4        | 35          | 17        | 80604733         | other                          |
| Ptpnc         | <b>Protein tyrosine phosphatase, receptor type, C</b> | <b>107</b>  | <b>120</b>  | <b>1.3E-01</b>  | <b>1.1</b> | <b>117</b>  | <b>163</b>  | <b>1.2E-06</b>  | <b>1.4</b> | <b>1</b>    | <b>1</b>  | <b>139960218</b> | <b>phosphatase</b>             |
| Zip703        | Zinc finger protein 703                               | 76          | 118         | 1.1E-07         | 1.6        | 93          | 129         | 1.9E-05         | 1.4        | 5           | 8         | 28091694         |                                |
| Egfr          | <b>Epidermal growth factor receptor</b>               | <b>49</b>   | <b>44</b>   | <b>3.3E-01</b>  | <b>0.9</b> | <b>64</b>   | <b>89</b>   | <b>3.8E-04</b>  | <b>1.4</b> | <b>1</b>    | <b>11</b> | <b>16813700</b>  | <b>kinase</b>                  |
| Eef2          | Eukaryotic translation elongation factor 2            | 1006        | 1259        | 1.4E-20         | 1.3        | 1077        | 1489        | 1.3E-46         | 1.4        | 452         | 10        | 80645110         | translation regulator          |
| Atf4          | Activating transcription factor 4                     | 442         | 559         | 8.3E-11         | 1.3        | 395         | 543         | 1.6E-17         | 1.4        | 59          | 15        | 80087454         | transcription regulator        |
| Lgals3bp      | Lectin, galactoside-binding, soluble, 3 binding pro   | 96          | 155         | 3.0E-11         | 1.6        | 167         | 230         | 2.4E-08         | 1.4        | 4           | 11        | 118254154        | transmembrane receptor         |
| Cggbp1        | Cggbp1                                                | 105         | 96          | 3.1E-01         | 0.9        | 100         | 137         | 1.8E-05         | 1.4        | 16          | 16        | 64855795         | other                          |
| Jmjd1c        | Jumonji domain containing 1C                          | 71          | 97          | 4.1E-04         | 1.4        | 61          | 84          | 6.6E-04         | 1.4        | 8           | 10        | 66718250         | other                          |
| Rcan1         | Regulator of calcineurin 1                            | 61          | 124         | 7.7E-17         | 2.0        | 62          | 85          | 7.2E-04         | 1.4        | 28          | 16        | 92392420         | transcription regulator        |
| Ralgds        | Ral guanine nucleotide dissociation stimulator        | 63          | 89          | 1.5E-04         | 1.4        | 56          | 78          | 9.7E-04         | 1.4        | 3           | 2         | 28408221         | other                          |
| Rpl18a        | Ribosomal protein L18A                                | 1320        | 1118        | 1.8E-12         | 0.9        | 965         | 1321        | 2.3E-39         | 1.4        | 406         | 1         | 97395575         | other                          |
| Arf4          | ADP-ribosylation factor 4                             | 721         | 573         | 1.9E-12         | 0.8        | 577         | 792         | 1.4E-24         | 1.4        | 83          | 14        | 27476149         | enzyme                         |
| Rpl18         | Ribosomal protein L18                                 | 612         | 594         | 3.7E-01         | 1.0        | 556         | 763         | 1.1E-23         | 1.4        | 289         | 11        | 96110137         | other                          |
| Rac1          | RAS-related C3 botulinum substrate 1                  | 393         | 438         | 5.7E-03         | 1.1        | 388         | 533         | 6.0E-17         | 1.4        | 176         | 5         | 144266376        | enzyme                         |
| Hspa1a        | Heat shock protein 1A                                 | 252         | 189         | 3.2E-07         | 0.8        | 213         | 292         | 6.8E-10         | 1.4        | 16          | 17        | 35106385         | other                          |
| Capza1        | Capping protein (actin filament) muscle Z-line, alp   | 155         | 161         | 6.1E-01         | 1.0        | 152         | 209         | 1.4E-07         | 1.4        | 19          | 1         | 107355415        | other                          |
| Ythdf1        | YTH domain family 1                                   | 77          | 100         | 3.1E-03         | 1.3        | 109         | 149         | 9.5E-06         | 1.4        | 16          | 2         | 180639331        | other                          |
| Ar14c         | ADP-ribosylation factor-like 4C                       | 73          | 127         | 5.4E-12         | 1.8        | 108         | 147         | 1.2E-05         | 1.4        | 1           | 1         | 90596978         | enzyme                         |
| Slc30a1       | Solute carrier family 30 (zinc transporter), membe    | 141         | 121         | 3.4E-02         | 0.9        | 85          | 117         | 9.7E-05         | 1.4        | 16          | 1         | 193737016        | transporter                    |
| Rhog          | Ras homolog gene family, member G                     | 68          | 82          | 3.8E-02         | 1.2        | 77          | 106         | 1.8E-04         | 1.4        | 4           | 7         | 109387735        | enzyme                         |
| Ywhaz         | Tyrosine 3-monooxygenase/tryptophan 5-monoox          | 389         | 378         | 5.0E-01         | 1.0        | 368         | 499         | 5.4E-15         | 1.4        | 95          | 3         | 92495067         | enzyme                         |
| Hnrpab        | Heterogeneous nuclear ribonucleoprotein A/B           | 363         | 380         | 2.7E-01         | 1.1        | 318         | 433         | 1.2E-13         | 1.4        | 94          | 11        | 51414801         | enzyme                         |
| Esd           | Esterase D/formylglutathione hydrolase                | 232         | 240         | 5.3E-01         | 1.0        | 244         | 332         | 1.0E-10         | 1.4        | 66          | 14        | 75149608         | enzyme                         |
| Tra2a         | Transformer 2 alpha homolog (Drosophila)              | 241         | 268         | 3.5E-02         | 1.1        | 206         | 282         | 2.0E-09         | 1.4        | 41          | 6         | 49193961         |                                |
| Sf1           | Splicing factor 1                                     | 124         | 212         | 1.6E-17         | 1.7        | 163         | 221         | 1.6E-07         | 1.4        | 39          | 19        | 6377049          | transcription regulator        |
| Casp4         | Caspase 4, apoptosis-related cysteine peptidase       | 129         | 159         | 2.1E-03         | 1.2        | 146         | 199         | 4.6E-07         | 1.4        | 0           | 9         | 5324817          | peptidase                      |
| Man2a1        | Mannosidase 2, alpha 1                                | 127         | 128         | 8.9E-01         | 1.0        | 121         | 164         | 6.2E-06         | 1.4        | 17          | 17        | 65104178         | enzyme                         |
| Fbxo33        | F-box protein 33                                      | 91          | 136         | 1.3E-07         | 1.5        | 101         | 138         | 3.7E-05         | 1.4        | 5           | 12        | 60301858         | other                          |
| Rbbp6         | Retinoblastoma binding protein 6                      | 79          | 98          | 1.2E-02         | 1.2        | 90          | 123         | 8.6E-05         | 1.4        | 25          | 7         | 130145858        | other                          |
| Centb2        | Centaurin, beta 2                                     | 60          | 66          | 3.2E-01         | 1.1        | 66          | 91          | 6.7E-04         | 1.4        | 6           | 16        | 31093027         | other                          |
| Spon1         | Spondin 1, (f-spondin) extracellular matrix protein   | 93          | 90          | 7.0E-01         | 1.0        | 62          | 85          | 9.6E-04         | 1.4        | 2           | 7         | 121184667        | other                          |
| Rpl7a         | Ribosomal protein L7a                                 | 1008        | 1108        | 1.6E-04         | 1.1        | 1049        | 1421        | 1.2E-39         | 1.4        | 323         | 20        | 163292735        | other                          |
| Ilgav         | Integrin alpha V                                      | 218         | 172         | 5.4E-05         | 0.8        | 176         | 237         | 1.0E-07         | 1.4        | 25          | 2         | 83647007         | other                          |
| Hspa1b        | Hspa1b                                                | 681         | 187         | 7.6E-182        | 0.3        | 153         | 207         | 4.8E-07         | 1.4        | 16          | 17        | 35093476         | other                          |
| Reep3         | Receptor accessory protein 3                          | 78          | 101         | 2.5E-03         | 1.3        | 88          | 118         | 1.9E-04         | 1.4        | 12          | 10        | 66474294         | other                          |
| Kcne4         | Potassium voltage-gated channel, Isk-related sub      | 73          | 127         | 9.5E-12         | 1.7        | 84          | 113         | 2.6E-04         | 1.4        | 0           | 1         | 78816418         | ion channel                    |
| Dnajb6        | DnaJ (Hsp40) homolog, subfamily B, member 6           | 113         | 88          | 3.2E-03         | 0.8        | 72          | 98          | 5.4E-04         | 1.4        | 28          | 12        | 65888539         | transcription regulator        |
| Il1m          | Interleukin 1 receptor antagonist                     | 1168        | 1214        | 9.7E-02         | 1.0        | 1050        | 1403        | 4.0E-36         | 1.3        | 0           | 2         | 24206310         | cytokine                       |
| Calm1         | Calmodulin 1                                          | 807         | 951         | 2.0E-09         | 1.2        | 784         | 1051        | 6.7E-28         | 1.3        | 166         | 12        | 101445374        | other                          |
| Rpl3          | Ribosomal protein L3                                  | 563         | 672         | 7.0E-08         | 1.2        | 577         | 773         | 8.4E-21         | 1.3        | 61          | 20        | 71417136         | other                          |
| Marcks        | Myristoylated alanine rich protein kinase C substr    | 488         | 588         | 8.7E-08         | 1.2        | 435         | 582         | 5.2E-16         | 1.3        | 16          | 10        | 36855007         |                                |
| Odc1          | <b>Ornithine decarboxylase, structural 1</b>          | <b>415</b>  | <b>463</b>  | <b>4.5E-03</b>  | <b>1.1</b> | <b>349</b>  | <b>467</b>  | <b>3.0E-13</b>  | <b>1.3</b> | <b>52</b>   | <b>12</b> | <b>17557769</b>  | <b>enzyme</b>                  |
| C1s           | Complement component 1, s subcomponent                | 160         | 196         | 1.1E-03         | 1.2        | 159         | 212         | 1.1E-06         | 1.3        | 6           | 6         | 124574790        | peptidase                      |
| Efh2          | EF hand domain containing 2                           | 194         | 123         | 7.4E-12         | 0.6        | 94          | 126         | 1.4E-04         | 1.3        | 7           | 4         | 61401318         | other                          |
| Plk3r5        | Phosphoinositide-3-kinase, regulatory subunit 5, p    | 71          | 111         | 1.5E-07         | 1.6        | 85          | 113         | 3.5E-04         | 1.3        | 0           | 11        | 68311091         | kinase                         |
| Ctsb          | Cathepsin B                                           | 1007        | 837         | 1.1E-11         | 0.8        | 643         | 855         | 5.4E-22         | 1.3        | 157         | 14        | 63761832         | peptidase                      |
| Pgam1         | Phosphoglycerate mutase 1                             | 147         | 178         | 2.1E-03         | 1.2        | 187         | 249         | 2.2E-07         | 1.3        | 73          | 19        | 41993048         | phosphatase                    |
| Pde4b         | Phosphodiesterase 4B, cAMP specific                   | 221         | 250         | 1.9E-02         | 1.1        | 175         | 233         | 4.8E-07         | 1.3        | 39          | 4         | 102278114        | enzyme                         |
| Golp3         | Golgi phosphoprotein 3                                | 181         | 180         | 8.9E-01         | 1.0        | 146         | 193         | 4.9E-06         | 1.3        | 47          | 15        | 12280856         | other                          |
| Sox9          | <b>SRY-box containing gene 9</b>                      | <b>131</b>  | <b>120</b>  | <b>2.3E-01</b>  | <b>0.9</b> | <b>127</b>  | <b>168</b>  | <b>2.3E-05</b>  | <b>1.3</b> | <b>0</b>    | <b>11</b> | <b>112647154</b> | <b>transcription regulator</b> |
| Crk           | V-crk sarcoma virus CT10 oncogene homolog (av         | 128         | 124         | 7.2E-01         | 1.0        | 105         | 140         | 8.4E-05         | 1.3        | 51          | 11        | 75519522         | other                          |
| CD40          | <b>CD40 antigen</b>                                   | <b>104</b>  | <b>106</b>  | <b>7.9E-01</b>  | <b>1.0</b> | <b>92</b>   | <b>123</b>  | <b>2.4E-04</b>  | <b>1.3</b> | <b>0</b>    | <b>2</b>  | <b>164897022</b> | <b>ransmembrane receptor</b>   |
| Slc25a37      | Solute carrier family 25, member 37                   | 76          | 87          | 1.3E-01         | 1.1        | 75          | 100         | 8.5E-04         | 1.3        | 5           | 14        | 69859974         | transporter                    |
| Fth1          | <b>Ferritin heavy chain 1</b>                         | <b>7502</b> | <b>9191</b> | <b>4.8E-115</b> | <b>1.2</b> | <b>7381</b> | <b>9769</b> | <b>1.1E-225</b> | <b>1.3</b> | <b>2546</b> | <b>19</b> | <b>10059484</b>  | <b>enzyme</b>                  |
| Ywhaq         | Tyrosine 3-monooxygenase/tryptophan 5-monoox          | 248         | 290         | 1.6E-03         | 1.2        | 225         | 298         | 2.0E-08         | 1.3        | 35          | 13        | 13323968         | other                          |
| Rod1          | RDD1 regulator of differentiation 1 (S. pombe)        | 153         | 152         | 9.6E-01         | 1.0        | 150         | 199         | 4.5E-06         | 1.3        | 8           | 20        | 125872024        | other                          |
| Ifit1         | Ifit1                                                 | 918         | 1394        | 3.4E-68         | 1.5        | 1516        | 1988        | 9.3E-45         | 1.3        | 1           | 19        | 34724399         | other                          |

|               |                                                        |            |            |                |            |            |            |                |            |           |           |                 |                                 |
|---------------|--------------------------------------------------------|------------|------------|----------------|------------|------------|------------|----------------|------------|-----------|-----------|-----------------|---------------------------------|
| Rps9          | Ribosomal protein S9                                   | 1207       | 1248       | 1.6E-01        | 1.0        | 1352       | 1770       | 1.7E-39        | 1.3        | 323       | 7         | 3657487         | other                           |
| Anxa5         | Annexin A5                                             | 486        | 618        | 5.0E-12        | 1.3        | 560        | 734        | 1.9E-17        | 1.3        | 48        | 3         | 36347846        | other                           |
| Tpm3          | Tropomyosin 3, gamma                                   | 557        | 560        | 8.9E-01        | 1.0        | 514        | 673        | 5.3E-16        | 1.3        | 24        | 14        | 113715491       | other                           |
| Mrc1          | Mrc1                                                   | 423        | 471        | 4.9E-03        | 1.1        | 402        | 527        | 6.4E-13        | 1.3        | 1         | 2         | 14253324        | transmembrane receptor          |
| Eif5a         | Eukaryotic translation initiation factor 5A            | 295        | 352        | 8.9E-05        | 1.2        | 384        | 501        | 4.2E-12        | 1.3        | 113       | 19        | 17767598        | translation regulator           |
| Rpl27a        | Ribosomal protein L27a                                 | 219        | 334        | 7.4E-18        | 1.5        | 363        | 476        | 5.9E-12        | 1.3        | 60        | 13        | 99674289        | other                           |
| Ssb           | Sjogren syndrome antigen B                             | 136        | 178        | 3.5E-05        | 1.3        | 171        | 225        | 2.0E-06        | 1.3        | 31        | 2         | 69708848        | enzyme                          |
| Srgn          | Seryglycin                                             | 778        | 782        | 8.7E-01        | 1.0        | 494        | 640        | 2.5E-14        | 1.3        | 11        | 10        | 61957583        | other                           |
| Sgpl1         | Sphingosine phosphatase 1                              | 272        | 277        | 7.0E-01        | 1.0        | 216        | 280        | 3.7E-07        | 1.3        | 16        | 10        | 60561544        | enzyme                          |
| Samd9l        | Sterile alpha motif domain containing 9-like           | 66         | 135        | 3.6E-18        | 2.0        | 124        | 160        | 1.2E-04        | 1.3        | 2         | 6         | 3322877         | other                           |
| Spred1        | Sprouty protein with EVH-1 domain 1, related seq       | 109        | 143        | 1.5E-04        | 1.3        | 113        | 148        | 1.7E-04        | 1.3        | 13        | 2         | 117007922       | other                           |
| U2af1         | U2 small nuclear ribonucleoprotein auxiliary factor    | 74         | 88         | 4.5E-02        | 1.2        | 92         | 120        | 8.5E-04        | 1.3        | 14        | 18        | 64771589        | other                           |
| Sh3pxd2b      | SH3 and PX domains 2B                                  | 78         | 91         | 6.2E-02        | 1.2        | 88         | 115        | 9.1E-04        | 1.3        | 1         | 11        | 32327971        | other                           |
| Rpl32         | Ribosomal protein L32                                  | 449        | 663        | 1.4E-29        | 1.5        | 1167       | 771        | 1.6E-55        | 0.7        | 200       | 8         | 4392146         | other                           |
| Kctd12        | Potassium channel tetramerisation domain contain       | 467        | 448        | 2.6E-01        | 1.0        | 459        | 301        | 1.2E-23        | 0.7        | 5         | 14        | 103376008       | ion channel                     |
| <b>Tnf</b>    | <b>Tumor necrosis factor</b>                           | <b>486</b> | <b>383</b> | <b>2.1E-09</b> | <b>0.8</b> | <b>459</b> | <b>301</b> | <b>1.9E-23</b> | <b>0.7</b> | <b>24</b> | <b>17</b> | <b>35336544</b> | <b>cytokine</b>                 |
| Lhfp          | Lipoma HMGIC fusion partner                            | 201        | 145        | 3.3E-07        | 0.7        | 301        | 198        | 6.7E-16        | 0.7        | 24        | 3         | 53065507        | other                           |
| Dpep1         | Dipeptidase 1 (renal)                                  | 465        | 234        | 2.1E-50        | 0.5        | 275        | 183        | 4.7E-14        | 0.7        | 5         | 8         | 125725658       | peptidase                       |
| Serpinb6a     | Serine (or cysteine) peptidase inhibitor, clade B, m   | 266        | 157        | 1.6E-19        | 0.6        | 157        | 104        | 9.9E-09        | 0.7        | 70        | 13        | 34009870        |                                 |
| Rnf2          | Ring finger protein 2                                  | 86         | 85         | 8.9E-01        | 1.0        | 146        | 96         | 2.2E-08        | 0.7        | 20        | 1         | 153316750       | transcription regulator         |
| Kpnb1         | Karyopherin (importin) beta 1                          | 67         | 69         | 7.6E-01        | 1.0        | 110        | 73         | 1.9E-06        | 0.7        | 34        | 11        | 97021144        | transporter                     |
| Mettl2        | Methyltransferase like 2                               | 33         | 46         | 7.7E-03        | 1.4        | 77         | 51         | 4.3E-05        | 0.7        | 13        | 11        | 105002412       | enzyme                          |
| Gpr133        | Gpr133                                                 | 50         | 49         | 9.1E-01        | 1.0        | 62         | 41         | 3.3E-04        | 0.7        | 1         | 5         | 129710434       | γ-protein coupled receptor      |
| Amtl2         | Angiotensin II receptor type 2                         | 47         | 41         | 3.1E-01        | 0.9        | 61         | 41         | 3.9E-04        | 0.7        | 16        | 9         | 102635655       | other                           |
| <b>Pml</b>    | <b>Promyelocytic leukemia</b>                          | <b>24</b>  | <b>35</b>  | <b>1.1E-02</b> | <b>1.5</b> | <b>60</b>  | <b>40</b>  | <b>4.6E-04</b> | <b>0.7</b> | <b>1</b>  | <b>9</b>  | <b>58066824</b> | <b>transcription regulator</b>  |
| Scara5        | Scavenger receptor class A, member 5 (putative)        | 181        | 183        | 8.5E-01        | 1.0        | 137        | 88         | 2.0E-08        | 0.7        | 3         | 14        | 66383568        | other                           |
| H28           | Histocompatibility 28                                  | 41         | 52         | 3.9E-02        | 1.3        | 127        | 82         | 5.3E-08        | 0.7        | 0         | 3         | 151421721       |                                 |
| Ecm2          | Extracellular matrix protein 2, female organ and a     | 60         | 71         | 8.4E-02        | 1.2        | 67         | 43         | 8.3E-05        | 0.7        | 2         | 13        | 49628072        | other                           |
| No14          | Nucleolar protein 14                                   | 42         | 45         | 5.3E-01        | 1.1        | 65         | 42         | 1.2E-04        | 0.7        | 8         | 5         | 34981184        | other                           |
| Cxcl5         | Chemokine (C-X-C motif) ligand 5                       | 495        | 444        | 3.9E-03        | 0.9        | 820        | 524        | 2.5E-45        | 0.6        | 0         | 5         | 91190472        | cytokine                        |
| Tmem49        | Transmembrane protein 49                               | 236        | 289        | 5.9E-05        | 1.2        | 479        | 304        | 1.3E-27        | 0.6        | 30        | 11        | 86398404        | other                           |
| Rpl22         | Ribosomal protein L22                                  | 464        | 289        | 1.1E-27        | 0.6        | 285        | 183        | 2.1E-16        | 0.6        | 187       | 4         | 151708180       | other                           |
| Pcsk6         | Proprotein convertase subtilisin/kexin type 6          | 208        | 263        | 1.1E-05        | 1.3        | 157        | 100        | 4.9E-10        | 0.6        | 3         | 7         | 73195067        | peptidase                       |
| Gas6          | Growth arrest specific 6                               | 50         | 89         | 3.9E-09        | 1.8        | 144        | 92         | 4.2E-09        | 0.6        | 13        | 8         | 13465428        | growth factor                   |
| Crispld2      | Cysteine-rich secretory protein LCCL domain cont       | 154        | 182        | 7.9E-03        | 1.2        | 139        | 89         | 4.9E-09        | 0.6        | 2         | 8         | 122575402       | other                           |
| Scn7a         | Sodium channel, voltage-gated, type VII, alpha         | 79         | 96         | 3.2E-02        | 1.2        | 105        | 67         | 4.3E-07        | 0.6        | 1         | 2         | 66512014        | ion channel                     |
| Rbmxrt        | RNA binding motif protein, X chromosome retroge        | 70         | 51         | 3.3E-03        | 0.7        | 79         | 50         | 1.2E-05        | 0.6        | 15        | 14        | 44292900        |                                 |
| Rps26         | Ribosomal protein S26                                  | 448        | 300        | 1.5E-20        | 0.7        | 566        | 354        | 3.4E-34        | 0.6        | 149       | 12        | 48914233        | other                           |
| <b>Edg3</b>   | <b>Endothelial differentiation, sphingolipid G-pro</b> | <b>117</b> | <b>172</b> | <b>1.1E-08</b> | <b>1.5</b> | <b>327</b> | <b>207</b> | <b>1.4E-19</b> | <b>0.6</b> | <b>2</b>  | <b>13</b> | <b>51517205</b> | <b>protein coupled receptor</b> |
| Hsd11b1       | Hydroxysteroid 11-beta dehydrogenase 1                 | 215        | 102        | 1.9E-27        | 0.5        | 155        | 97         | 1.9E-10        | 0.6        | 5         | 1         | 195048089       | enzyme                          |
| Tmem33        | Transmembrane protein 33                               | 82         | 70         | 1.0E-01        | 0.9        | 117        | 74         | 4.4E-08        | 0.6        | 20        | 5         | 67677741        | other                           |
| Eif3e         | Eukaryotic translation initiation factor 3, subunit E  | 137        | 91         | 1.9E-07        | 0.7        | 109        | 69         | 1.3E-07        | 0.6        | 66        | 18        | 90480181        | translation regulator           |
| Prr13         | Proline rich 13                                        | 36         | 51         | 3.7E-03        | 1.4        | 85         | 54         | 2.6E-06        | 0.6        | 8         | 15        | 102293032       | other                           |
| B2m           | Beta-2 microglobulin                                   | 1009       | 1282       | 2.4E-23        | 1.3        | 1675       | 1034       | 1.4E-102       | 0.6        | 40        | 2         | 121978818       | transmembrane receptor          |
| Rps29         | Ribosomal protein S29                                  | 363        | 943        | 1.8E-187       | 2.6        | 1227       | 755        | 2.6E-76        | 0.6        | 133       | 20        | 48374259        | other                           |
| Ifi204        | Interferon activated gene 204                          | 620        | 552        | 5.9E-04        | 0.9        | 730        | 449        | 2.6E-46        | 0.6        | 1         | 1         | 175677424       |                                 |
| Pdgfra        | Platelet derived growth factor receptor, alpha poly    | 68         | 72         | 5.9E-01        | 1.1        | 130        | 81         | 3.5E-09        | 0.6        | 1         | 5         | 75594161        | kinase                          |
| Gadd45g       | Growth arrest and DNA-damage-inducible 45 gamma        | 88         | 74         | 8.1E-02        | 0.9        | 84         | 52         | 1.8E-06        | 0.6        | 32        | 13        | 51943254        | other                           |
| Nlrp3         | NLR family, pyrin domain containing 3                  | 39         | 55         | 4.9E-03        | 1.4        | 62         | 38         | 3.4E-05        | 0.6        | 0         | 11        | 59380019        |                                 |
| H2-Q7         | Histocompatibility 2, Q region locus 7                 | 26         | 41         | 1.3E-03        | 1.6        | 61         | 38         | 4.4E-05        | 0.6        | 1         | 17        | 35580549        |                                 |
| Ubr1          | Ubr1                                                   | 46         | 30         | 3.4E-03        | 0.7        | 48         | 30         | 2.6E-04        | 0.6        | 21        | 2         | 120686136       | enzyme                          |
| Ccl4          | Chemokine (C-C motif) ligand 4                         | 3460       | 3523       | 1.9E-01        | 1.0        | 4956       | 3044       | 1.0E-305       | 0.6        | 2         | 11        | 83478150        | cytokine                        |
| Rpl34         | Ribosomal protein L34                                  | 722        | 328        | 8.2E-96        | 0.5        | 351        | 215        | 2.2E-23        | 0.6        | 243       | 6         | 71074846        | other                           |
| Mfsd1         | Major facilitator superfamily domain containing 1      | 108        | 124        | 6.3E-02        | 1.2        | 261        | 161        | 1.1E-17        | 0.6        | 7         | 3         | 67408032        | transporter                     |
| Socs3         | Suppressor of cytokine signaling 3                     | 452        | 256        | 3.0E-36        | 0.6        | 208        | 126        | 4.4E-15        | 0.6        | 54        | 11        | 117827721       | other                           |
| Nmd3          | NMD3 homolog (S. cerevisiae)                           | 65         | 40         | 3.0E-05        | 0.6        | 47         | 29         | 2.5E-04        | 0.6        | 14        | 3         | 69552820        | other                           |
| Tbk1          | TANK-binding kinase 1                                  | 100        | 81         | 2.0E-02        | 0.8        | 129        | 77         | 2.4E-10        | 0.6        | 16        | 10        | 120983542       | kinase                          |
| Hmgn1         | High mobility group nucleosomal binding domain 1       | 138        | 66         | 3.9E-18        | 0.5        | 108        | 64         | 6.1E-09        | 0.6        | 49        | 16        | 96343257        | transcription regulator         |
| <b>Il15</b>   | <b>Interleukin 15</b>                                  | <b>38</b>  | <b>47</b>  | <b>7.4E-02</b> | <b>1.3</b> | <b>77</b>  | <b>46</b>  | <b>1.5E-06</b> | <b>0.6</b> | <b>2</b>  | <b>8</b>  | <b>84855672</b> | <b>cytokine</b>                 |
| Pdcd6         | Programmed cell death 6                                | 16         | 31         | 7.5E-05        | 1.9        | 59         | 35         | 2.0E-05        | 0.6        | 8         | 13        | 74441028        | other                           |
| Gmeb2         | Glucocorticoid modulatory element binding protein      | 21         | 21         | 9.6E-01        | 1.0        | 51         | 31         | 8.8E-05        | 0.6        | 4         | 2         | 180986268       | transcription regulator         |
| Ggh           | Gamma-glutamyl hydrolase                               | 41         | 20         | 6.7E-06        | 0.5        | 46         | 28         | 2.0E-04        | 0.6        | 9         | 4         | 19993203        | peptidase                       |
| Cd74          | CD74 antigen (invariant polypeptide of major histo     | 1098       | 1605       | 8.1E-66        | 1.5        | 1469       | 872        | 4.7E-103       | 0.6        | 5         | 18        | 60972270        | transmembrane receptor          |
| Leptn         | Leptin receptor overlapping transcript                 | 85         | 82         | 6.7E-01        | 1.0        | 170        | 100        | 1.4E-13        | 0.6        | 24        | 4         | 101331927       | other                           |
| Sash1         | SAM and SH3 domain containing 1                        | 61         | 86         | 2.2E-04        | 1.4        | 134        | 78         | 2.9E-11        | 0.6        | 4         | 10        | 8442384         | other                           |
| Tollip        | Toll interacting protein                               | 72         | 37         | 1.5E-08        | 0.5        | 54         | 32         | 2.8E-05        | 0.6        | 25        | 7         | 149067594       | other                           |
| Senp6         | SUMO/sentrin specific peptidase 6                      | 22         | 38         | 1.3E-04        | 1.8        | 55         | 32         | 3.3E-05        | 0.6        | 11        | 9         | 79984569        | peptidase                       |
| 4631427C17Rik | RIKEN cDNA 4631427C17 gene                             | 50         | 33         | 1.7E-03        | 0.7        | 48         | 28         | 1.0E-04        | 0.6        | 12        | 6         | 29861992        |                                 |
| Twistnb       | Twistnb                                                | 25         | 28         | 4.4E-01        | 1.1        | 43         | 25         | 1.8E-04        | 0.6        | 4         | 12        | 34122746        | other                           |



|               |                                                        |            |            |                |            |            |            |                |            |          |           |                  |                         |
|---------------|--------------------------------------------------------|------------|------------|----------------|------------|------------|------------|----------------|------------|----------|-----------|------------------|-------------------------|
| Numb1         | Numb-like                                              | 11         | 12         | 6.3E-01        | 1.1        | 35         | 20         | 9.1E-04        | 0.6        | 0        | 7         | 28067008         | other                   |
| Trn9sf3       | Transmembrane 9 superfamily member 3                   | 145        | 152        | 5.1E-01        | 1.0        | 407        | 237        | 1.2E-31        | 0.6        | 54       | 13        | 88437293         | transporter             |
| Eif3s10       | Eukaryotic translation initiation factor 3, subunit 10 | 92         | 168        | 4.9E-17        | 1.8        | 270        | 158        | 2.8E-21        | 0.6        | 22       | 19        | 60837789         | translation regulator   |
| Gstm1         | Glutathione S-transferase, mu 1                        | 199        | 221        | 7.2E-02        | 1.1        | 174        | 101        | 1.3E-14        | 0.6        | 50       | 3         | 107815398        | enzyme                  |
| Ubiquin1      | Ubiquilin 1                                            | 52         | 54         | 6.7E-01        | 1.1        | 154        | 89         | 6.2E-13        | 0.6        | 23       | 13        | 58279025         | other                   |
| Pim1          | Proviral integration site 1                            | 69         | 107        | 4.0E-07        | 1.6        | 137        | 80         | 1.3E-11        | 0.6        | 4        | 17        | 29632244         | kinase                  |
| Zochc6        | Zinc finger, CCHC domain containing 6                  | 65         | 81         | 2.3E-02        | 1.2        | 127        | 74         | 4.1E-11        | 0.6        | 10       | 13        | 59873660         | other                   |
| Ccdc23        | Coiled-coil domain containing 23                       | 27         | 57         | 9.2E-09        | 2.1        | 121        | 70         | 1.4E-10        | 0.6        | 9        | 4         | 118873522        | other                   |
| Dhx9          | DEAH (Asp-Glu-Ala-His) box polypeptide 9               | 36         | 44         | 9.3E-02        | 1.2        | 94         | 54         | 1.2E-08        | 0.6        | 12       | 1         | 155303082        | enzyme                  |
| Gvin1         | GTPase, very large interferon inducible 1              | 56         | 45         | 6.9E-02        | 0.8        | 55         | 32         | 1.9E-05        | 0.6        | 1        | 7         | 113300402        | other                   |
| Hmgcr         | 3-hydroxy-3-methylglutaryl-Coenzyme A reductase        | 17         | 19         | 6.6E-01        | 1.1        | 42         | 25         | 1.6E-04        | 0.6        | 2        | 13        | 97419485         | enzyme                  |
| BC057170      | CDNA sequence BC057170                                 | 15         | 26         | 3.8E-03        | 1.7        | 32         | 18         | 9.3E-04        | 0.6        | 2        | 5         | 105505724        | other                   |
| Trnfap6       | Tumor necrosis factor alpha induced protein 6          | 822        | 765        | 1.3E-02        | 0.9        | 1197       | 687        | 1.7E-93        | 0.6        | 0        | 2         | 51911794         | other                   |
| Uap1          | UDP-N-acetylglucosamine pyrophosphorylase 1            | 703        | 449        | 2.0E-37        | 0.6        | 788        | 449        | 7.7E-64        | 0.6        | 13       | 1         | 172072297        | enzyme                  |
| Cebpd         | CCAAT/enhancer binding protein (C/EBP), delta          | 616        | 431        | 9.4E-23        | 0.7        | 647        | 368        | 6.5E-53        | 0.6        | 30       | 16        | 15888502         | transcription regulator |
| H2-Eb1        | Histocompatibility 2, class II antigen E beta          | 358        | 488        | 4.8E-15        | 1.4        | 586        | 337        | 1.1E-46        | 0.6        | 2        | 17        | 34452889         | other                   |
| Ilgp1         | Interferon inducible GTPase 1                          | 140        | 189        | 1.5E-06        | 1.4        | 250        | 141        | 8.8E-22        | 0.6        | 54       | 18        | 60552173         | other                   |
| Ch25h         | Cholesterol 25-hydroxylase                             | 72         | 127        | 6.3E-12        | 1.8        | 237        | 135        | 1.9E-20        | 0.6        | 1        | 19        | 34548435         | enzyme                  |
| Abca8a        | ATP-binding cassette, sub-family A (ABC1), member 8    | 46         | 87         | 2.2E-10        | 1.9        | 76         | 44         | 2.3E-07        | 0.6        | 2        | 11        | 109886947        | other                   |
| Nsmce2        | Non-SMC element 2 homolog (MMS21, S. cerevisiae)       | 29         | 36         | 1.6E-01        | 1.2        | 58         | 33         | 7.4E-06        | 0.6        | 13       | 15        | 59432925         | other                   |
| Rrp15         | Ribosomal RNA processing 15 homolog (S. cerevisiae)    | 44         | 28         | 9.7E-04        | 0.6        | 44         | 25         | 7.8E-05        | 0.6        | 4        | 1         | 188545030        | other                   |
| Thumpd1       | THUMP domain containing 1                              | 30         | 22         | 6.0E-02        | 0.7        | 36         | 21         | 3.1E-04        | 0.6        | 8        | 7         | 126858780        | other                   |
| Bach1         | BTB and CNC homology 1                                 | 196        | 164        | 3.8E-03        | 0.8        | 182        | 102        | 1.6E-16        | 0.6        | 14       | 16        | 87733264         | transcription regulator |
| Ccl11         | Small chemokine (C-C motif) ligand 11                  | 101        | 82         | 1.9E-02        | 0.8        | 130        | 73         | 3.0E-12        | 0.6        | 1        | 11        | 81876390         | cytokine                |
| Birc3         | Baculoviral IAP repeat-containing 3                    | 67         | 80         | 7.0E-02        | 1.2        | 99         | 55         | 7.0E-10        | 0.6        | 3        | 9         | 7848823          | enzyme                  |
| Eftud2        | Elongation factor Tu GTP binding domain containing 2   | 26         | 30         | 2.6E-01        | 1.2        | 49         | 28         | 1.7E-05        | 0.6        | 9        | 11        | 102699852        | enzyme                  |
| Utp11l        | UTP11-like, U3 small nucleolar ribonucleoprotein, U3   | 38         | 32         | 3.0E-01        | 0.9        | 48         | 27         | 2.2E-05        | 0.6        | 17       | 4         | 124356007        | other                   |
| Mrt4          | MRT4, mRNA turnover 4, homolog (S. cerevisiae)         | 31         | 30         | 8.9E-01        | 1.0        | 37         | 21         | 2.0E-04        | 0.6        | 7        | 12        | 20424200         | other                   |
| Iifi205       | Iifi205                                                | 311        | 390        | 2.5E-07        | 1.3        | 507        | 280        | 1.2E-45        | 0.6        | 3        | 1         | 175942143        | other                   |
| Jundm2        | Jun dimerization protein 2                             | 161        | 117        | 5.4E-06        | 0.7        | 120        | 66         | 4.1E-12        | 0.6        | 1        | 12        | 86980286         | other                   |
| Mmp13         | Matrix metalloproteinase 13                            | 83         | 96         | 7.7E-02        | 1.2        | 119        | 65         | 5.4E-12        | 0.6        | 9        | 9         | 7283147          | peptidase               |
| Ets1          | E26 avian leukemia oncogene 1, 5' domain               | 56         | 59         | 5.8E-01        | 1.1        | 67         | 37         | 2.6E-07        | 0.6        | 3        | 9         | 32565405         | transcription regulator |
| Lcp2          | Lymphocyte cytosolic protein 2                         | 25         | 32         | 6.8E-02        | 1.3        | 51         | 28         | 6.9E-06        | 0.6        | 0        | 11        | 33991057         | other                   |
| Thrap1        | Thrap1                                                 | 34         | 23         | 2.1E-02        | 0.7        | 43         | 23         | 4.1E-05        | 0.6        | 8        | 11        | 86083674         | transcription regulator |
| E430028B21Rik | RIKEN cDNA E430028B21 gene                             | 39         | 32         | 1.9E-01        | 0.8        | 36         | 20         | 1.8E-04        | 0.6        | 8        | 14        | 27484594         | other                   |
| B4galt5       | B4galt5                                                | 848        | 349        | 1.7E-134       | 0.4        | 502        | 271        | 5.6E-48        | 0.5        | 6        | 2         | 167124014        | enzyme                  |
| Trim25        | Tripartite motif protein 25                            | 162        | 202        | 2.3E-04        | 1.3        | 498        | 267        | 6.0E-48        | 0.5        | 10       | 11        | 88881317         | transcription regulator |
| Pde2a         | Phosphodiesterase 2A, cGMP-stimulated                  | 93         | 80         | 9.2E-02        | 0.9        | 112        | 61         | 1.0E-11        | 0.5        | 13       | 7         | 108661304        | enzyme                  |
| Lrch3         | Lrch3                                                  | 36         | 32         | 5.2E-01        | 0.9        | 77         | 41         | 1.8E-08        | 0.5        | 18       | 16        | 33015699         | other                   |
| Mtdh          | Metadherin                                             | 104        | 130        | 3.1E-03        | 1.3        | 334        | 177        | 4.8E-34        | 0.5        | 28       | 15        | 34043839         | other                   |
| Stk40         | Serine/threonine kinase 40                             | 88         | 106        | 2.2E-02        | 1.2        | 126        | 67         | 7.2E-14        | 0.5        | 5        | 4         | 125818004        | kinase                  |
| Uaca          | Uveal autoantigen with coiled-coil domains and ar      | 48         | 47         | 8.4E-01        | 1.0        | 47         | 25         | 7.0E-06        | 0.5        | 12       | 9         | 60727986         | other                   |
| AK122525      | CDNA sequence AK122525                                 | 45         | 35         | 6.1E-02        | 0.8        | 41         | 21         | 1.9E-05        | 0.5        | 7        | 19        | 44063597         | other                   |
| BC063749      | CDNA sequence BC063749                                 | 9          | 33         | 5.5E-12        | 3.6        | 42         | 22         | 2.3E-05        | 0.5        | 2        | 19        | 47969126         | other                   |
| D4Ert22e      | DNA segment, Chr 4, ERATO Doi 22, expressed            | 28         | 30         | 6.2E-01        | 1.1        | 40         | 21         | 4.0E-05        | 0.5        | 10       | 4         | 140671259        | other                   |
| Mospd2        | Motile sperm domain containing 2                       | 21         | 17         | 3.4E-01        | 0.8        | 27         | 14         | 6.0E-04        | 0.5        | 8        | 15        | 64501599         | other                   |
| Cd63          | Cd63 antigen                                           | 580        | 463        | 4.9E-10        | 0.8        | 890        | 462        | 4.0E-92        | 0.5        | 95       | 10        | 128349820        | other                   |
| Smoc2         | SPARC related modular calcium binding 2                | 516        | 424        | 2.3E-07        | 0.8        | 424        | 222        | 7.5E-44        | 0.5        | 27       | 17        | 14541667         | other                   |
| Igfbp3        | Insulin-like growth factor binding protein 3           | 122        | 115        | 4.5E-01        | 0.9        | 278        | 144        | 4.9E-30        | 0.5        | 4        | 11        | 7106262          | other                   |
| Gbp1          | Guanylate nucleotide binding protein 1                 | 56         | 47         | 1.7E-01        | 0.9        | 175        | 91         | 1.1E-19        | 0.5        | 0        | 3         | 142282052        | enzyme                  |
| Mgst1         | Microsomal glutathione S-transferase 1                 | 65         | 100        | 1.6E-06        | 1.5        | 170        | 88         | 3.3E-19        | 0.5        | 30       | 6         | 138105250        | enzyme                  |
| Elov1         | Elongation of very long chain fatty acids (FEN1/Elo    | 43         | 51         | 1.4E-01        | 1.2        | 90         | 47         | 2.0E-10        | 0.5        | 5        | 4         | 118105124        | other                   |
| Stam          | Signal transducing adaptor molecule (SH3 domain)       | 55         | 50         | 3.5E-01        | 0.9        | 64         | 33         | 7.3E-08        | 0.5        | 14       | 2         | 14068984         | other                   |
| LOC545592     | Similar to heterogeneous nuclear ribonucleoprotein     | 27         | 43         | 1.2E-03        | 1.6        | 56         | 29         | 5.0E-07        | 0.5        | 10       | 4         | 12162928         | other                   |
| <b>Kctd11</b> | <b>Potassium channel tetramerisation domain co</b>     | <b>44</b>  | <b>21</b>  | <b>6.1E-07</b> | <b>0.5</b> | <b>54</b>  | <b>28</b>  | <b>6.9E-07</b> | <b>0.5</b> | <b>0</b> | <b>11</b> | <b>69691838</b>  | <b>other</b>            |
| Klf10         | Kruppel-like factor 10                                 | 51         | 23         | 6.2E-08        | 0.5        | 43         | 22         | 1.1E-05        | 0.5        | 5        | 15        | 38224291         | transcription regulator |
| Rps19bp1      | Ribosomal protein S19 binding protein 1                | 21         | 20         | 9.0E-01        | 1.0        | 31         | 16         | 1.6E-04        | 0.5        | 5        | 15        | 80091760         | other                   |
| Fbxl7         | F-box and leucine-rich repeat protein 7                | 16         | 18         | 4.8E-01        | 1.1        | 30         | 16         | 2.0E-04        | 0.5        | 6        | 15        | 26470280         | enzyme                  |
| Mbc2          | Membrane bound C2 domain containing protein            | 27         | 13         | 2.8E-04        | 0.5        | 27         | 14         | 3.8E-04        | 0.5        | 4        | 10        | 127947358        | other                   |
| Kdelc2        | KDEL (Lys-Asp-Glu-Leu) containing 2                    | 21         | 13         | 3.2E-02        | 0.6        | 26         | 14         | 6.4E-04        | 0.5        | 6        | 9         | 53209801         | other                   |
| Cxcl2         | Chemokine (C-X-C motif) ligand 2                       | 2626       | 3199       | 2.9E-39        | 1.2        | 4126       | 2088       | 0.0E+00        | 0.5        | 1        | 5         | 91334925         | cytokine                |
| <b>Csf1</b>   | <b>Colony stimulating factor 1 (macrophage)</b>        | <b>577</b> | <b>508</b> | <b>3.2E-04</b> | <b>0.9</b> | <b>815</b> | <b>417</b> | <b>8.6E-88</b> | <b>0.5</b> | <b>9</b> | <b>3</b>  | <b>107544351</b> | <b>cytokine</b>         |
| Il1a          | Interleukin 1 alpha                                    | 451        | 456        | 7.8E-01        | 1.0        | 399        | 204        | 6.7E-44        | 0.5        | 0        | 2         | 129125412        | cytokine                |
| Nol5          | Nucleolar protein 5                                    | 349        | 337        | 4.3E-01        | 1.0        | 380        | 195        | 1.0E-41        | 0.5        | 14       | 1         | 59768200         | other                   |
| Tsc22d2       | TSC22 domain family 2                                  | 225        | 114        | 5.2E-25        | 0.5        | 163        | 83         | 2.2E-19        | 0.5        | 24       | 3         | 58265466         | other                   |
| <b>Bmp2</b>   | <b>Bone morphogenetic protein 2</b>                    | <b>12</b>  | <b>28</b>  | <b>7.5E-06</b> | <b>2.3</b> | <b>32</b>  | <b>16</b>  | <b>9.6E-05</b> | <b>0.5</b> | <b>2</b> | <b>2</b>  | <b>133387902</b> | <b>growth factor</b>    |
| Pcna          | Proliferating cell nuclear antigen                     | 334        | 335        | 9.3E-01        | 1.0        | 528        | 265        | 2.9E-60        | 0.5        | 30       | 19        | 9358872          | other                   |
| Ogn           | Osteoglycin                                            | 517        | 423        | 1.4E-07        | 0.8        | 373        | 187        | 9.3E-43        | 0.5        | 88       | 13        | 49719664         | growth factor           |
| Rtn4          | Reticulon 4                                            | 80         | 125        | 1.9E-08        | 1.6        | 268        | 135        | 3.5E-31        | 0.5        | 15       | 11        | 29642916         | other                   |

|               |                                                        |            |            |                |            |            |            |                |            |           |           |                  |                              |
|---------------|--------------------------------------------------------|------------|------------|----------------|------------|------------|------------|----------------|------------|-----------|-----------|------------------|------------------------------|
| F3            | Coagulation factor III                                 | 154        | 145        | 4.0E-01        | 0.9        | 218        | 108        | 1.6E-26        | 0.5        | 15        | 3         | 121437645        | transmembrane receptor       |
| Myd88         | Myeloid differentiation primary response gene 88       | 57         | 86         | 2.1E-05        | 1.5        | 174        | 87         | 7.8E-21        | 0.5        | 3         | 9         | 119245146        | other                        |
| Bcl2a1d       | B-cell leukemic/lymphoma 2 related protein A1d         | 173        | 152        | 4.1E-02        | 0.9        | 159        | 79         | 1.7E-19        | 0.5        | 9         | 9         | 89102589         |                              |
| Smad7         | MAD homolog 7 (Drosophila)                             | 49         | 65         | 8.6E-03        | 1.3        | 101        | 51         | 5.5E-13        | 0.5        | 3         | 18        | 75555462         | transcription regulator      |
| <b>Adm</b>    | <b>Adrenomedullin</b>                                  | <b>38</b>  | <b>35</b>  | <b>6.5E-01</b> | <b>0.9</b> | <b>57</b>  | <b>29</b>  | <b>7.9E-08</b> | <b>0.5</b> | <b>2</b>  | <b>7</b>  | <b>117772834</b> | <b>other</b>                 |
| 2410004B18Rik | RIKEN cDNA 2410004B18 gene                             | 28         | 29         | 6.3E-01        | 1.1        | 49         | 24         | 5.6E-07        | 0.5        | 13        | 3         | 145607216        |                              |
| <b>Eef1e1</b> | <b>Eukaryotic translation elongation factor 1 epsi</b> | <b>16</b>  | <b>22</b>  | <b>5.3E-02</b> | <b>1.4</b> | <b>41</b>  | <b>21</b>  | <b>6.2E-06</b> | <b>0.5</b> | <b>5</b>  | <b>13</b> | <b>38737984</b>  | <b>translation regulator</b> |
| Ccl2          | Chemokine (C-C motif) ligand 2                         | 3499       | 2752       | 3.1E-59        | 0.8        | 6737       | 3314       | 0.0E+00        | 0.5        | 1         | 11        | 81850752         | cytokine                     |
| Atp6v1h       | ATPase, H+ transporting, lysosomal V1 subunit H        | 125        | 151        | 6.4E-03        | 1.2        | 325        | 161        | 7.8E-39        | 0.5        | 15        | 1         | 5152276          | transporter                  |
| Papola        | Poly (A) polymerase alpha                              | 125        | 84         | 9.9E-07        | 0.7        | 208        | 101        | 1.7E-26        | 0.5        | 58        | 12        | 107077035        | enzyme                       |
| Fbn1          | Fibulin 1                                              | 142        | 161        | 6.0E-02        | 1.1        | 204        | 101        | 4.2E-25        | 0.5        | 10        | 15        | 85082025         | other                        |
| Gbp2          | Guanylate nucleotide binding protein 2                 | 117        | 118        | 8.7E-01        | 1.0        | 179        | 88         | 1.6E-22        | 0.5        | 4         | 3         | 142300901        | enzyme                       |
| Smurf2        | SMAD specific E3 ubiquitin protein ligase 2            | 49         | 68         | 2.2E-03        | 1.4        | 150        | 73         | 1.8E-19        | 0.5        | 13        | 11        | 106681436        | enzyme                       |
| Ednrb         | Endothelin receptor type B                             | 204        | 107        | 6.5E-21        | 0.5        | 143        | 71         | 6.0E-18        | 0.5        | 5         | 14        | 104213965        | -protein coupled receptor    |
| Irf9          | Interferon regulatory factor 9                         | 63         | 76         | 4.9E-02        | 1.2        | 127        | 62         | 7.9E-17        | 0.5        | 4         | 14        | 56228808         | transcription regulator      |
| Ptx3          | Pentraxin related gene                                 | 108        | 87         | 9.2E-03        | 0.8        | 127        | 62         | 1.0E-16        | 0.5        | 3         | 66028821  | other            |                              |
| Tnfsf9        | Tnfsf9                                                 | 82         | 64         | 1.3E-02        | 0.8        | 81         | 40         | 4.7E-11        | 0.5        | 0         | 17        | 57247006         | cytokine                     |
| Vgll3         | Vestigial like 3 (Drosophila)                          | 21         | 29         | 6.2E-02        | 1.4        | 44         | 21         | 1.1E-06        | 0.5        | 0         | 16        | 65866540         | other                        |
| Mm.393358     | 4 days neonate male adipose cDNA, RIKEN full-le        | 64         | 35         | 6.4E-07        | 0.5        | 44         | 22         | 1.7E-06        | 0.5        | 3         | 8         | 109543376        |                              |
| Alg11         | Asparagine-linked glycosylation 11 homolog (yeas       | 15         | 17         | 4.9E-01        | 1.1        | 25         | 12         | 3.3E-04        | 0.5        | 2         | 8         | 23182037         | other                        |
| Errf1         | ERBB receptor feedback inhibitor 1                     | 1604       | 1445       | 7.1E-07        | 0.9        | 2512       | 1197       | 0.0E+00        | 0.5        | 14        | 4         | 150242862        | other                        |
| Denr          | Density-regulated protein                              | 124        | 168        | 5.6E-06        | 1.4        | 266        | 128        | 6.6E-34        | 0.5        | 44        | 5         | 124377313        | other                        |
| Tor1aip1      | Torsin A interacting protein 1                         | 75         | 77         | 7.1E-01        | 1.0        | 216        | 103        | 1.1E-28        | 0.5        | 22        | 1         | 157854151        | other                        |
| Rgs5          | Regulator of G-protein signaling 5                     | 123        | 71         | 2.9E-10        | 0.6        | 82         | 40         | 2.2E-11        | 0.5        | 58        | 1         | 171625525        | other                        |
| Cyp27a1       | Cytochrome P450, family 27, subfamily a, polypep       | 28         | 29         | 8.5E-01        | 1.0        | 27         | 13         | 1.5E-04        | 0.5        | 4         | 1         | 74784310         | enzyme                       |
| Pnp           | Purine-nucleoside phosphorylase                        | 112        | 216        | 6.8E-25        | 1.9        | 319        | 149        | 3.2E-43        | 0.5        | 1         | 14        | 51584845         |                              |
| Wdr43         | WD repeat domain 43                                    | 76         | 81         | 4.3E-01        | 1.1        | 169        | 79         | 1.7E-23        | 0.5        | 10        | 17        | 72008251         | other                        |
| Por           | P450 (cytochrome) oxidoreductase                       | 236        | 116        | 9.4E-28        | 0.5        | 152        | 71         | 1.5E-21        | 0.5        | 21        | 5         | 136211129        | enzyme                       |
| Clec3b        | C-type lectin domain family 3, member b                | 84         | 124        | 1.4E-06        | 1.5        | 149        | 71         | 2.5E-20        | 0.5        | 0         | 9         | 123066094        | other                        |
| 1810029B16Rik | RIKEN cDNA 1810029B16 gene                             | 33         | 27         | 1.5E-01        | 0.8        | 71         | 33         | 7.3E-11        | 0.5        | 8         | 18        | 17987722         |                              |
| Gas7          | Growth arrest specific 7                               | 17         | 29         | 2.1E-03        | 1.7        | 69         | 32         | 2.7E-10        | 0.5        | 0         | 11        | 67498476         | transcription regulator      |
| Atp8b1        | ATPase, class I, type 8B, member 1                     | 51         | 31         | 1.5E-04        | 0.6        | 64         | 30         | 8.0E-10        | 0.5        | 2         | 18        | 64688921         | transporter                  |
| Nol5a         | Nucleolar protein 5A                                   | 18         | 34         | 1.4E-04        | 1.8        | 44         | 21         | 6.5E-07        | 0.5        | 2         | 20        | 153867596        | other                        |
| Alkbh1        | AlkB, alkylation repair homolog 1 (E. coli)            | 15         | 21         | 9.1E-02        | 1.4        | 44         | 21         | 6.5E-07        | 0.5        | 4         | 12        | 88769054         | other                        |
| Rtnr4l2       | Reticulon 4 receptor-like 2                            | 17         | 13         | 2.1E-01        | 0.8        | 23         | 11         | 2.7E-04        | 0.5        | 0         | 2         | 84711534         | other                        |
| Il1b          | Interleukin 1 beta                                     | 208        | 210        | 8.8E-01        | 1.0        | 173        | 80         | 7.4E-25        | 0.5        | 0         | 2         | 129190624        | cytokine                     |
| 2500003M10Rik | RIKEN cDNA 2500003M10 gene                             | 101        | 67         | 8.8E-06        | 0.7        | 101        | 46         | 4.0E-15        | 0.5        | 45        | 19        | 11951313         |                              |
| Adora2b       | Adenosine A2b receptor                                 | 51         | 22         | 1.3E-08        | 0.4        | 35         | 16         | 4.5E-06        | 0.5        | 0         | 11        | 62079380         | -protein coupled receptor    |
| Kctd6         | Potassium channel tetramerisation domain contain       | 10         | 16         | 2.5E-02        | 1.6        | 35         | 16         | 4.5E-06        | 0.5        | 2         | 14        | 905935           | ion channel                  |
| <b>Hbegf</b>  | <b>Heparin-binding EGF-like growth factor</b>          | <b>274</b> | <b>242</b> | <b>1.7E-02</b> | <b>0.9</b> | <b>650</b> | <b>293</b> | <b>2.9E-92</b> | <b>0.5</b> | <b>62</b> | <b>18</b> | <b>36664667</b>  | <b>growth factor</b>         |
| Gadd45b       | Growth arrest and DNA-damage-inducible 45 beta         | 50         | 47         | 5.8E-01        | 0.9        | 250        | 113        | 1.7E-36        | 0.5        | 7         | 10        | 80393060         |                              |
| Prep          | Proline arginine-rich end leucine-rich repeat          | 176        | 103        | 8.5E-14        | 0.6        | 107        | 48         | 1.3E-16        | 0.5        | 2         | 1         | 135806961        | other                        |
| Oasl2         | 2'-5' oligoadenylate synthetase-like 2                 | 82         | 60         | 1.7E-03        | 0.7        | 82         | 37         | 8.1E-13        | 0.5        | 0         | 5         | 115362091        |                              |
| Fas           | Fas (TNF receptor superfamily member 6)                | 76         | 25         | 9.4E-18        | 0.3        | 55         | 25         | 2.4E-09        | 0.5        | 13        | 19        | 34402056         | transmembrane receptor       |
| Nmb           | Neuremedin B                                           | 52         | 21         | 1.1E-09        | 0.4        | 33         | 15         | 4.5E-06        | 0.5        | 2         | 7         | 88049050         | other                        |
| Adamtsl2      | ADAMTS-like 2                                          | 2          | 3          | 4.5E-01        | 1.4        | 19         | 9          | 6.4E-04        | 0.5        | 2         | 2         | 26964467         | other                        |
| Ccl7          | Ccl7                                                   | 5019       | 2281       | 0.0E+00        | 0.5        | 3519       | 1551       | 0.0E+00        | 0.4        | 2         | 11        | 81860822         | cytokine                     |
| Timm8a1       | Translocase of inner mitochondrial membrane 8 h        | 64         | 34         | 2.8E-07        | 0.5        | 70         | 31         | 1.1E-11        | 0.4        | 31        | 10        | 11330167         |                              |
| Nrf1          | Nuclear respiratory factor 1                           | 12         | 13         | 7.2E-01        | 1.1        | 20         | 9          | 3.6E-04        | 0.4        | 5         | 6         | 30103391         | transcription regulator      |
| Serpine1      | Serine (or cysteine) peptidase inhibitor, clade E, m   | 1050       | 427        | 9.0E-169       | 0.4        | 892        | 381        | 2.1E-139       | 0.4        | 53        | 5         | 137537492        | other                        |
| Mat2a         | Methionine adenosyltransferase II, alpha               | 130        | 208        | 6.2E-14        | 1.6        | 455        | 195        | 9.5E-72        | 0.4        | 31        | 6         | 72382914         | enzyme                       |
| Vasn          | Vasorin                                                | 660        | 253        | 2.5E-117       | 0.4        | 415        | 180        | 2.4E-64        | 0.4        | 8         | 16        | 4650616          | other                        |
| Tcf21         | Transcription factor 21                                | 217        | 149        | 1.2E-09        | 0.7        | 191        | 82         | 8.4E-31        | 0.4        | 1         | 10        | 22537316         | transcription regulator      |
| Abcb1b        | ATP-binding cassette, sub-family B (MDR/TAP), m        | 52         | 33         | 3.7E-04        | 0.6        | 48         | 21         | 1.1E-08        | 0.4        | 4         | 5         | 8866142          |                              |
| Peg10         | Paternally expressed 10                                | 15         | 15         | 9.4E-01        | 1.0        | 23         | 10         | 9.0E-05        | 0.4        | 0         | 6         | 4710008          | other                        |
| AI552584      | Expressed sequence AI552584                            | 16         | 13         | 4.6E-01        | 0.8        | 19         | 8          | 2.7E-04        | 0.4        | 5         | 6         | 22206000         |                              |
| Fgl2          | Fibrinogen-like protein 2                              | 260        | 308        | 4.9E-04        | 1.2        | 419        | 177        | 3.7E-68        | 0.4        | 78        | 5         | 20884092         | peptidase                    |
| Areg          | Amphiregulin                                           | 161        | 106        | 6.9E-09        | 0.7        | 143        | 60         | 7.4E-25        | 0.4        | 5         | 5         | 91577385         | growth factor                |
| Lrrc59        | Lrrc59                                                 | 21         | 48         | 3.6E-09        | 2.3        | 119        | 50         | 8.5E-21        | 0.4        | 4         | 11        | 94505075         | other                        |
| 1100001H23Rik | RIKEN cDNA 1100001H23 gene                             | 62         | 44         | 2.6E-03        | 0.7        | 61         | 26         | 5.0E-11        | 0.4        | 31        | 6         | 136560717        |                              |
| Pcdh9         | Pcdh9                                                  | 31         | 24         | 1.0E-01        | 0.8        | 48         | 20         | 4.8E-09        | 0.4        | 2         | 14        | 94284014         | other                        |
| BC067047      | CDNA sequence BC067047                                 | 21         | 22         | 7.0E-01        | 1.1        | 39         | 17         | 1.2E-07        | 0.4        | 1         | 2         | 166391883        | other                        |
| Efh1          | EF hand domain containing 1                            | 26         | 36         | 3.3E-02        | 1.4        | 31         | 13         | 2.4E-06        | 0.4        | 1         | 1         | 89207392         | other                        |
| Mgl2          | Macrophage galactose N-acetyl-galactosamine sp         | 29         | 26         | 4.9E-01        | 0.9        | 25         | 11         | 2.9E-05        | 0.4        | 0         | 11        | 69950454         |                              |
| BC013712      | CDNA sequence BC013712                                 | 4          | 12         | 1.1E-04        | 3.3        | 31         | 12         | 1.3E-06        | 0.4        | 4         | 4         | 132337926        | other                        |
| Zfp800        | Zinc finger protein 800                                | 10         | 15         | 5.1E-02        | 1.6        | 18         | 8          | 2.6E-04        | 0.4        | 0         | 6         | 28190292         |                              |
| Hmx1          | Heme oxygenase (decycling) 1                           | 2430       | 827        | 0.0E+00        | 0.3        | 1456       | 576        | 2.9E-258       | 0.4        | 5         | 8         | 77624257         | enzyme                       |
| Tlr2          | Toll-like receptor 2                                   | 242        | 429        | 2.0E-37        | 1.8        | 1126       | 446        | 1.8E-199       | 0.4        | 0         | 3         | 83640720         | transmembrane receptor       |
| Etck1         | Ethanolamine kinase 1                                  | 81         | 47         | 3.3E-07        | 0.6        | 79         | 32         | 5.4E-15        | 0.4        | 20        | 6         | 143156894        | kinase                       |

|               |                                                      |          |          |                |            |           |          |                |            |          |                 |                         |                      |
|---------------|------------------------------------------------------|----------|----------|----------------|------------|-----------|----------|----------------|------------|----------|-----------------|-------------------------|----------------------|
| Larp6         | La ribonucleoprotein domain family, member 6         | 24       | 15       | 1.8E-02        | 0.6        | 28        | 11       | 2.8E-06        | 0.4        | 9        | 60586279        | other                   |                      |
| Mkl1          | Mixed lineage kinase domain-like                     | 10       | 6        | 8.5E-02        | 0.6        | 25        | 10       | 1.2E-05        | 0.4        | 1        | 113835795       | kinase                  |                      |
| Nfx1          | Nuclear transcription factor, X-box binding-like 1   | 18       | 10       | 1.4E-02        | 0.6        | 15        | 6        | 5.8E-04        | 0.4        | 4        | 72904815        | transcription regulator |                      |
| Ngfb          | Nerve growth factor, beta                            | 480      | 346      | 1.5E-15        | 0.7        | 576       | 223      | 1.9E-107       | 0.4        | 1        | 10324866        | growth factor           |                      |
| Ifrd1         | Interferon-related developmental regulator 1         | 453      | 253      | 7.0E-38        | 0.6        | 365       | 144      | 1.0E-66        | 0.4        | 72       | 40930527        | other                   |                      |
| Krr1          | KRR1, small subunit (SSU) processome compone         | 37       | 36       | 8.5E-01        | 1.0        | 83        | 32       | 9.1E-17        | 0.4        | 13       | 111423077       | other                   |                      |
| Lamc2         | Lamc2                                                | 12       | 15       | 3.3E-01        | 1.2        | 17        | 7        | 1.8E-04        | 0.4        | 4        | 154969921       | other                   |                      |
| Traf3ip2      | Traf3 interacting protein 2                          | 16       | 8        | 1.6E-02        | 0.5        | 15        | 6        | 4.3E-04        | 0.4        | 4        | 39374598        | other                   |                      |
| Erb2          | ErbB2 interacting protein                            | 60       | 90       | 1.1E-05        | 1.5        | 332       | 125      | 4.5E-65        | 0.4        | 16       | 104609399       | cytokine                |                      |
| Ell           | Elongation factor RNA polymerase II                  | 14       | 25       | 1.5E-03        | 1.8        | 50        | 19       | 6.8E-11        | 0.4        | 2        | 73116602        | transcription regulator |                      |
| Rcl1          | RNA terminal phosphate cyclase-like 1                | 66       | 24       | 4.3E-14        | 0.4        | 49        | 18       | 4.2E-11        | 0.4        | 4        | 29218276        | enzyme                  |                      |
| Tsr1          | TSR1, 20S rRNA accumulation, homolog (yeast)         | 62       | 33       | 4.4E-07        | 0.5        | 46        | 17       | 1.7E-10        | 0.4        | 13       | 74722724        | other                   |                      |
| Srfbp1        | Serum response factor binding protein 1              | 21       | 21       | 9.7E-01        | 1.0        | 46        | 17       | 2.3E-10        | 0.4        | 3        | 52650392        | other                   |                      |
| Tspan13       | Tetraspanin 13                                       | 22       | 18       | 3.1E-01        | 0.8        | 42        | 16       | 1.3E-09        | 0.4        | 9        | 36741484        | other                   |                      |
| Ggta1         | Gamma-glutamyltransferase-like activity 1            | 17       | 14       | 2.9E-01        | 0.8        | 19        | 7        | 3.9E-05        | 0.4        | 1        | 75077870        | enzyme                  |                      |
| Psen1         | Presenilin 1                                         | 16       | 8        | 5.5E-03        | 0.5        | 14        | 5        | 5.3E-04        | 0.4        | 3        | 85075929        | peptidase               |                      |
| Aldh1a1       | Aldehyde dehydrogenase family 1, subfamily A1        | 5        | 3        | 1.9E-01        | 0.5        | 13        | 5        | 7.0E-04        | 0.4        | 0        | 20717881        | enzyme                  |                      |
| Ninj1         | Ninjurin 1                                           | 216      | 125      | 5.3E-17        | 0.6        | 160       | 58       | 8.6E-34        | 0.4        | 22       | 49291504        | other                   |                      |
| Efemp1        | Epidermal growth factor-containing fibulin-like extr | 88       | 40       | 1.2E-12        | 0.5        | 60        | 21       | 9.9E-14        | 0.4        | 2        | 28826655        | other                   |                      |
| Itga8         | Integrin alpha 8                                     | 15       | 10       | 6.9E-02        | 0.6        | 17        | 6        | 8.5E-05        | 0.4        | 1        | 12028307        | other                   |                      |
| Trip2         | TNFAIP3 interacting protein 2                        | 27       | 35       | 6.6E-02        | 1.3        | 66        | 23       | 2.2E-15        | 0.4        | 5        | 34838881        | other                   |                      |
| Dph2          | DPH2 homolog (S. cerevisiae)                         | 13       | 7        | 2.0E-02        | 0.5        | 15        | 5        | 2.0E-04        | 0.4        | 3        | 117561674       | other                   |                      |
| Thbd          | Thrombomodulin                                       | 494      | 395      | 1.1E-08        | 0.8        | 498       | 158      | 5.1E-122       | 0.3        | 20       | 148230235       | transmembrane receptor  |                      |
| Nasp          | Nuclear autoantigenic sperm protein (histone-bind    | 61       | 98       | 2.2E-07        | 1.6        | 242       | 77       | 7.2E-60        | 0.3        | 5        | 116274325       | other                   |                      |
| Rap2a         | RAS related protein 2a                               | 31       | 37       | 1.8E-01        | 1.2        | 139       | 45       | 1.0E-34        | 0.3        | 10       | 120906331       | enzyme                  |                      |
| Inmt          | Indolethylamine N-methyltransferase                  | 34       | 27       | 1.2E-01        | 0.8        | 15        | 5        | 6.5E-05        | 0.3        | 0        | 55120755        | other                   |                      |
| Ccl3          | Chemokine (C-C motif) ligand 3                       | 456      | 514      | 1.2E-03        | 1.1        | 1172      | 363      | 2.4E-292       | 0.3        | 0        | 83461414        | cytokine                |                      |
| Ctds12        | CTD (carboxy-terminal domain, RNA polymerase         | 13       | 10       | 3.2E-01        | 0.8        | 32        | 10       | 1.1E-09        | 0.3        | 4        | 121839113       | other                   |                      |
| Sfrs10        | Splicing factor, arginine/serine-rich 10 (transforme | 342      | 362      | 1.9E-01        | 1.1        | 1346      | 390      | 0.0E+00        | 0.3        | 58       | 31619223        | other                   |                      |
| Prkc1         | Protein kinase C, iota                               | 45       | 59       | 2.3E-02        | 1.3        | 250       | 74       | 1.1E-67        | 0.3        | 10       | 30951569        | kinase                  |                      |
| Ms444d        | Membrane-spanning 4-domains, subfamily A, mem        | 156      | 81       | 6.9E-17        | 0.5        | 162       | 48       | 1.6E-44        | 0.3        | 2        | 11632884        | other                   |                      |
| Atp13a1       | ATPase type 13A1                                     | 10       | 12       | 4.3E-01        | 1.2        | 77        | 23       | 7.7E-22        | 0.3        | 3        | 72331102        | transporter             |                      |
| Lrrc8a        | Leucine rich repeat containing 8A                    | 53       | 15       | 1.8E-15        | 0.3        | 35        | 10       | 1.0E-10        | 0.3        | 19       | 30119237        | other                   |                      |
| LOC544988     | LOC544988                                            | 5        | 9        | 3.2E-02        | 1.9        | 24        | 7        | 8.2E-08        | 0.3        | 1        | 6071396         | other                   |                      |
| Sema3c        | Sema domain, immunoglobulin domain (Ig), short       | 70       | 46       | 1.2E-04        | 0.7        | 62        | 17       | 6.1E-19        | 0.3        | 10       | 17236017        | other                   |                      |
| Idi1          | Isopentenyl-diphosphate delta isomerase              | 11       | 15       | 2.3E-01        | 1.3        | 47        | 13       | 1.5E-14        | 0.3        | 2        | 111268326       | enzyme                  |                      |
| Eme1          | Essential meiotic endonuclease 1 homolog 1 (S. p     | 9        | 10       | 5.7E-01        | 1.1        | 22        | 6        | 1.5E-07        | 0.3        | 2        | 94506516        | other                   |                      |
| Fjx1          | Four jointed box 1 (Drosophila)                      | 5        | 4        | 5.4E-01        | 0.8        | 9         | 3        | 7.7E-04        | 0.3        | 2        | 102289677       | other                   |                      |
| Msc           | Musculin                                             | 15       | 36       | 1.4E-07        | 2.4        | 65        | 17       | 8.4E-21        | 0.3        | 0        | 14743469        | transcription regulator |                      |
| Klhl15        | Kelch-like 15 (Drosophila)                           | 4        | 2        | 2.8E-01        | 0.6        | 10        | 3        | 2.4E-04        | 0.3        | 1        | 91499311        | other                   |                      |
| Slc39a1       | Slc39a1                                              | 41       | 92       | 2.0E-15        | 2.2        | 332       | 81       | 9.1E-107       | 0.3        | 8        | 90057332        | transporter             |                      |
| Csf3          | Colony stimulating factor 3 (granulocyte)            | 184      | 179      | 6.5E-01        | 1.0        | 304       | 77       | 4.5E-95        | 0.3        | 0        | 98564857        | other                   |                      |
| BB128963      | BB128963                                             | 9        | 7        | 5.5E-01        | 0.8        | 12        | 3        | 4.2E-05        | 0.3        | 3        | 71485482        | other                   |                      |
| Trhde         | TRH-degrading enzyme                                 | 5        | 6        | 6.6E-01        | 1.1        | 12        | 3        | 4.2E-05        | 0.3        | 0        | 113836536       | peptidase               |                      |
| Evi1          | <b>Ecotropic viral integration site 1</b>            | <b>4</b> | <b>4</b> | <b>7.2E-01</b> | <b>1.1</b> | <b>11</b> | <b>3</b> | <b>1.6E-04</b> | <b>0.3</b> | <b>0</b> | <b>29850314</b> | <b>other</b>            |                      |
| Ccdc137       | Coiled-coil domain containing 137                    | 18       | 19       | 7.9E-01        | 1.0        | 60        | 14       | 3.4E-21        | 0.2        | 3        | 120325641       | other                   |                      |
| Sf3b3         | Splicing factor 3b, subunit 3                        | 14       | 27       | 1.7E-04        | 2.0        | 142       | 32       | 3.1E-50        | 0.2        | 7        | 113344736       | other                   |                      |
| Utp3          | UTP3, small subunit (SSU) processome compone         | 10       | 17       | 1.8E-02        | 1.7        | 106       | 25       | 1.2E-36        | 0.2        | 4        | 89894503        | other                   |                      |
| Xab2          | XPA binding protein 2                                | 17       | 16       | 9.9E-01        | 1.0        | 81        | 18       | 4.1E-29        | 0.2        | 7        | 3610133         | other                   |                      |
| BC011487      | CDNA sequence BC011487                               | 6        | 7        | 5.6E-01        | 1.2        | 13        | 3        | 1.3E-05        | 0.2        | 0        | 42573061        | other                   |                      |
| Pomt2         | Protein-O-mannosyltransferase 2                      | 4        | 1        | 6.8E-02        | 0.3        | 10        | 2        | 1.9E-04        | 0.2        | 0        | 88449821        | enzyme                  |                      |
| Tmem167       | Transmembrane protein 167                            | 22       | 24       | 5.5E-01        | 1.1        | 156       | 34       | 1.1E-55        | 0.2        | 8        | 90244148        | other                   |                      |
| Cxcl3         | Chemokine (C-X-C motif) ligand 3                     | 166      | 67       | 2.4E-28        | 0.4        | 113       | 25       | 2.0E-41        | 0.2        | 5        | 91216932        | other                   |                      |
| Ttf1          | Ttf1                                                 | 8        | 6        | 5.4E-01        | 0.8        | 34        | 8        | 3.2E-13        | 0.2        | 4        | 28943082        | transcription regulator |                      |
| EG668139      | Predicted gene, EG668139                             | 15       | 12       | 3.2E-01        | 0.8        | 26        | 6        | 2.3E-10        | 0.2        | 0        | 113647919       | other                   |                      |
| Aloxe3        | Arachidonate lipoxygenase 3                          | 4        | 2        | 4.6E-01        | 0.7        | 9         | 2        | 3.4E-04        | 0.2        | 11       | 68962464        | enzyme                  |                      |
| Stk38l        | Serine/threonine kinase 38 like                      | 39       | 50       | 3.3E-02        | 1.3        | 333       | 70       | 1.4E-121       | 0.2        | 7        | 4643669         | kinase                  |                      |
| Synj1         | Synaptojanin 1                                       | 11       | 17       | 3.2E-02        | 1.6        | 70        | 15       | 1.2E-26        | 0.2        | 3        | 90937363        | phosphatase             |                      |
| E430025E21Rik | RIKEN cDNA E430025E21 gene                           | 47       | 61       | 1.6E-02        | 1.3        | 346       | 69       | 8.0E-132       | 0.2        | 23       | 59163683        | other                   |                      |
| Cdc42ep4      | CDC42 effector protein (Rho GTPase binding) 4        | 21       | 32       | 7.7E-03        | 1.5        | 166       | 34       | 4.8E-63        | 0.2        | 3        | 113588210       | other                   |                      |
| <b>Fgf10</b>  | <b>Fibroblast growth factor 10</b>                   | <b>5</b> | <b>2</b> | <b>1.3E-01</b> | <b>0.5</b> | <b>7</b>  | <b>2</b> | <b>5.8E-04</b> | <b>0.2</b> | <b>0</b> | <b>13</b>       | <b>119579634</b>        | <b>growth factor</b> |
| Chrd          | Chordin                                              | 5        | 9        | 4.6E-02        | 1.8        | 34        | 6        | 6.2E-15        | 0.2        | 0        | 20742244        | other                   |                      |
| Mm.441364     | CDNA clone IMAGE:3667370                             | 7        | 4        | 2.2E-01        | 0.6        | 11        | 2        | 4.6E-06        | 0.2        | 0        | 109124898       | other                   |                      |
| Retnla        | Resistin like alpha                                  | 17       | 23       | 1.0E-01        | 1.3        | 11        | 2        | 1.1E-05        | 0.2        | 16       | 48844491        | other                   |                      |
| Ddx20         | DEAD (Asp-Glu-Ala-Asp) box polypeptide 20            | 2        | 2        | 4.4E-01        | 1.5        | 7         | 1        | 6.3E-04        | 0.2        | 1        | 105481458       | transcription regulator |                      |
| Slc7a8        | Solute carrier family 7 (cationic amino acid transp  | 63       | 81       | 9.7E-03        | 1.3        | 385       | 61       | 1.1E-168       | 0.2        | 1        | 55341071        | transporter             |                      |
| Dtx4          | Deltex 4 homolog (Drosophila)                        | 24       | 41       | 1.4E-04        | 1.7        | 218       | 32       | 3.3E-101       | 0.2        | 0        | 12540863        | other                   |                      |
| Ccbe1         | Collagen and calcium binding EGF domains 1           | 15       | 5        | 1.1E-04        | 0.3        | 7         | 1        | 1.6E-04        | 0.2        | 3        | 66216573        | other                   |                      |
| Rio1          | RIO kinase 1 (yeast)                                 | 23       | 21       | 5.0E-01        | 0.9        | 202       | 28       | 2.4E-96        | 0.1        | 5        | 38152980        | kinase                  |                      |

|               |                                            |    |    |         |     |     |    |         |     |    |           |                            |                         |
|---------------|--------------------------------------------|----|----|---------|-----|-----|----|---------|-----|----|-----------|----------------------------|-------------------------|
| Darc          | Duffy blood group, chemokine receptor      | 8  | 2  | 1.8E-03 | 0.2 | 8   | 1  | 6.5E-05 | 0.1 | 1  | 175262052 | γ-protein coupled receptor |                         |
| Sla           | Src-like adaptor                           | 3  | 8  | 1.2E-02 | 2.3 | 8   | 1  | 6.5E-05 | 0.1 | 15 | 66612470  | other                      |                         |
| Ccl24         | Chemokine (C-C motif) ligand 24            | 36 | 43 | 1.3E-01 | 1.2 | 29  | 4  | 1.7E-15 | 0.1 | 0  | 5         | 136046497                  | cytokine                |
| Dnmt3l        | DNA (cytosine-5-)-methyltransferase 3-like | 4  | 1  | 5.5E-02 | 0.3 | 12  | 2  | 2.8E-07 | 0.1 | 0  | 10        | 77526299                   |                         |
| Tcf15         | Transcription factor 15                    | 13 | 5  | 1.5E-03 | 0.4 | 30  | 2  | 3.3E-19 | 0.1 | 4  | 2         | 151974553                  | transcription regulator |
| C130026I21Rik | RIKEN cDNA C130026I21 gene                 | 9  | 22 | 9.1E-06 | 2.6 | 552 | 33 | 0.0E+00 | 0.1 | 1  | 1         | 87345248                   |                         |
| Colec10       | Collectin sub-family member 10             | 1  | 4  | 1.6E-02 | 3.8 | 106 | 1  | 1.9E-88 | 0.0 | 0  | 15        | 54297713                   | other                   |
| Gm1381        | Gm1381                                     | 0  | 0  | 9.8E-01 | 0.0 | 9   | 0  | 1.5E-08 | 0.0 | 0  | 5         | 93003863                   |                         |
| Mybphl        | Myosin binding protein H-like              | 0  | 1  | 1.7E-01 | 4.7 | 4   | 0  | 5.2E-04 | 0.0 | 1  | 3         | 108177692                  | other                   |

**Supplemental Table 1.** (Excel file)

Non-myocytes were isolated from hearts of untreated (No CsA) and cyclosporine (CsA)-treated wildtype (WT) and  $\alpha$ MHC<sup>403/+</sup> (403) mice. GeneID is the RefGene identification. RNA levels were assessed by DSAGE and tag counts per gene are expressed as tag counts per million total counts. P-values reflect the comparison of WT versus  $\alpha$ MHC<sup>403/+</sup> non-myocyte RNA tag counts. Fold change indicates the ratio of  $\alpha$ MHC<sup>403/+</sup> to WT non-myocyte RNA expression. Cell cycle-control genes are indicated in **bold**. Chr, chromosome number. Position, chromosomal position; Geneclass\_ingen, gene class as determined by Ingenuity Pathway Analysis software.

**Supplemental Table 2: Non-myocyte RNAs with  $\geq 7$  fold increased expression in the  $\alpha$ MHC<sup>403/+</sup> CsA heart**

| GeneID        | Title                                                        | No CsA     |            |                 |            | CsA        |             |                 |             |
|---------------|--------------------------------------------------------------|------------|------------|-----------------|------------|------------|-------------|-----------------|-------------|
|               |                                                              | WT         | 403        | p-value         | Fold       | WT         | 403         | p-Value         | Fold        |
| Cthrc1        | Collagen triple helix repeat containing 1                    | 1          | 6          | 6.5E-05         | 9.4        | 1          | 78          | 2.7E-74         | 141.2       |
| Col11a1       | Collagen, type XI, alpha 1                                   | 0          | 1          | 5.4E-02         | 10.0       | 0          | 38          | 3.9E-37         | 139.2       |
| BC052328      | CDNA sequence BC052328                                       | 8          | 9          | 4.7E-01         | 1.2        | 0          | 13          | 1.5E-12         | 47.8        |
| Thoc4         | THO complex 4                                                | 8          | 9          | 7.8E-01         | 1.1        | 0          | 12          | 4.3E-11         | 42.3        |
| Adam8         | A disintegrin and metallopeptidase domain 8                  | 7          | 13         | 2.2E-02         | 1.8        | 2          | 49          | 1.8E-38         | 22.0        |
| Spp1          | Secreted phosphoprotein 1                                    | 43         | 105        | 3.0E-20         | 2.4        | 39         | 828         | 0.0E+00         | 21.1        |
| Col16a1       | Collagen, type XVI, alpha 1                                  | 7          | 13         | 1.2E-02         | 1.9        | 2          | 45          | 9.6E-34         | 17.9        |
| <b>Postn</b>  | <b>Periostin, osteoblast specific factor (1)</b>             | <b>108</b> | <b>391</b> | <b>3.8E-123</b> | <b>3.6</b> | <b>147</b> | <b>2498</b> | <b>0.0E+00</b>  | <b>17.0</b> |
| <b>Eln</b>    | <b>Elastin(2, 3)</b>                                         | <b>14</b>  | <b>48</b>  | <b>2.5E-15</b>  | <b>3.4</b> | <b>15</b>  | <b>230</b>  | <b>7.1E-162</b> | <b>15.4</b> |
| B4galnt1      | Beta-1,4-N-acetyl-galactosaminyl transferase 1               | 1          | 6          | 1.2E-03         | 4.7        | 1          | 17          | 3.5E-13         | 15.4        |
| Ahsg          | Alpha-2-HS-glycoprotein                                      | 7          | 11         | 8.6E-02         | 1.6        | 2          | 34          | 9.6E-25         | 15.2        |
| 0610007N19Rik | RIKEN cDNA 0610007N19 gene                                   | 5          | 5          | 9.4E-01         | 0.9        | 1          | 12          | 6.2E-10         | 15.0        |
| Mfap2         | Microfibrillar-associated protein 2                          | 9          | 14         | 1.1E-01         | 1.5        | 5          | 71          | 1.9E-49         | 14.2        |
| Crlf1         | Cytokine receptor-like factor 1                              | 8          | 29         | 2.8E-11         | 3.8        | 7          | 97          | 3.7E-67         | 14.0        |
| <b>Dusp4</b>  | <b>Dual specificity phosphatase 4 (4)</b>                    | <b>36</b>  | <b>26</b>  | <b>4.6E-02</b>  | <b>0.7</b> | <b>15</b>  | <b>213</b>  | <b>1.3E-145</b> | <b>14.0</b> |
| 5730596K20Rik | RIKEN cDNA 5730596K20 gene                                   | 7          | 4          | 1.2E-01         | 0.5        | 1          | 7           | 5.5E-06         | 13.0        |
| Fxyd6         | FXDY domain-containing ion transport regulator 6             | 7          | 13         | 1.3E-02         | 1.9        | 3          | 36          | 2.1E-24         | 11.8        |
| Top2a         | Topoisomerase (DNA) II alpha                                 | 3          | 3          | 1.0E+00         | 0.9        | 1          | 9           | 2.9E-07         | 11.4        |
| Birc5         | Baculoviral IAP repeat-containing 5                          | 5          | 2          | 6.2E-02         | 0.4        | 1          | 9           | 6.2E-07         | 10.9        |
| Serpina3a     | Serine (or cysteine) peptidase inhibitor, clade A, member 3A | 5          | 6          | 6.0E-01         | 1.2        | 2          | 17          | 5.1E-12         | 10.5        |
| Tnfrsf11b     | TNF receptor superfamily, member 11b (osteoprotegerin)       | 5          | 10         | 2.4E-02         | 1.9        | 7          | 69          | 1.2E-43         | 10.4        |
| <b>Tnc</b>    | <b>Tenascin C (5, 6, 7)</b>                                  | <b>22</b>  | <b>92</b>  | <b>2.7E-34</b>  | <b>4.1</b> | <b>89</b>  | <b>915</b>  | <b>0.0E+00</b>  | <b>10.2</b> |
| Skp2          | S-phase kinase-associated protein 2 (p45)                    | 1          | 2          | 1.6E-01         | 2.3        | 1          | 6           | 1.2E-04         | 10.2        |
| 6330503K22Rik | RIKEN cDNA 6330503K22 gene                                   | 6          | 7          | 4.3E-01         | 1.3        | 0          | 13          | 1.7E-13         | 10.0        |
| 9430028L06Rik | RIKEN cDNA 9430028L06 gene                                   | 0          | 2          | 5.7E-02         | 4.7        | 0          | 11          | 1.2E-11         | 10.0        |
| Zbtb46        | Zinc finger and BTB domain containing 46                     | 5          | 5          | 9.4E-01         | 1.0        | 0          | 7           | 1.6E-07         | 10.0        |
| Sdc1          | Syndecan 1                                                   | 12         | 18         | 2.8E-02         | 1.6        | 13         | 127         | 4.1E-76         | 9.6         |
| Vsig4         | V-set and immunoglobulin domain containing 4                 | 4          | 13         | 1.3E-05         | 3.6        | 1          | 13          | 3.7E-09         | 9.6         |
| <b>Timp1</b>  | <b>Tissue inhibitor of metalloproteinase 1 (5,6)</b>         | <b>123</b> | <b>175</b> | <b>1.2E-07</b>  | <b>1.4</b> | <b>185</b> | <b>1587</b> | <b>0.0E+00</b>  | <b>8.6</b>  |
| <b>Col1a2</b> | <b>Collagen, type I, alpha 2 (6)</b>                         | <b>195</b> | <b>214</b> | <b>1.1E-01</b>  | <b>1.1</b> | <b>102</b> | <b>865</b>  | <b>0.0E+00</b>  | <b>8.5</b>  |
| F10           | Coagulation factor X                                         | 3          | 7          | 3.3E-02         | 2.2        | 2          | 21          | 6.0E-13         | 8.3         |



|               |                                                                        |            |            |                |            |            |             |                |            |
|---------------|------------------------------------------------------------------------|------------|------------|----------------|------------|------------|-------------|----------------|------------|
| <b>Col3a1</b> | <b>Collagen, type III, alpha 1 (6)</b>                                 | <b>209</b> | <b>447</b> | <b>2.1E-62</b> | <b>2.1</b> | <b>336</b> | <b>2755</b> | <b>0.0E+00</b> | <b>8.2</b> |
| Glpr2         | GLI pathogenesis-related 2                                             | 4          | 4          | 7.8E-01        | 0.9        | 2          | 18          | 4.6E-11        | 8.0        |
| Ldlrad3       | Low density lipoprotein receptor class A domain containing 3           | 7          | 5          | 2.9E-01        | 0.7        | 1          | 11          | 5.9E-07        | 7.6        |
| <b>Col1a1</b> | <b>Collagen, type I, alpha 1 (6)</b>                                   | <b>285</b> | <b>449</b> | <b>1.1E-26</b> | <b>1.6</b> | <b>274</b> | <b>2048</b> | <b>0.0E+00</b> | <b>7.5</b> |
| Slpi          | Secretory leukocyte peptidase inhibitor                                | 3          | 7          | 1.5E-02        | 2.5        | 5          | 37          | 7.7E-21        | 7.4        |
| <b>Ltbp2</b>  | <b>Latent transforming growth factor beta binding protein 2 (8, 9)</b> | <b>8</b>   | <b>24</b>  | <b>1.3E-07</b> | <b>3.1</b> | <b>9</b>   | <b>66</b>   | <b>8.1E-36</b> | <b>7.4</b> |
| Fkhl18        | Forkhead-like 18 (Drosophila)                                          | 4          | 7          | 7.0E-02        | 1.9        | 9          | 68          | 9.4E-37        | 7.4        |
| Gdf6          | Growth differentiation factor 6                                        | 6          | 5          | 4.9E-01        | 0.8        | 1          | 10          | 1.2E-06        | 7.4        |
| Arg2          | Arginase type II                                                       | 12         | 12         | 9.2E-01        | 1.0        | 5          | 37          | 1.5E-20        | 7.4        |
| Nnmt          | Nicotinamide N-methyltransferase                                       | 8          | 5          | 1.9E-01        | 0.6        | 1          | 10          | 2.4E-06        | 7.1        |
| Ttc9          | Tetratricopeptide repeat domain 9                                      | 5          | 14         | 8.1E-05        | 2.9        | 6          | 41          | 1.8E-22        | 7.1        |
| Trim59        | Tripartite motif-containing 59                                         | 5          | 13         | 1.0E-03        | 2.4        | 2          | 15          | 3.1E-09        | 7.0        |
| Sec61b        | Sec61 beta subunit                                                     | 10         | 9          | 6.6E-01        | 0.9        | 2          | 17          | 3.4E-10        | 7.0        |

Non-myocytes were isolated from hearts of untreated (No CsA) and cyclosporine-treated (CsA) wildtype (WT) and  $\alpha$ MHC<sup>403/+</sup> (403) mice. GeneID denotes the RefGene identification. RNA levels were assessed by DSAGE. Tag counts per million RNA tags are shown. P-values reflect the comparison of WT versus  $\alpha$ MHC<sup>403/+</sup> non-myocyte RNA tag counts. Fold change indicates the ratio of  $\alpha$ MHC<sup>403/+</sup> to WT non-myocyte RNA expression. Tgf $\beta$  responsive genes are indicated in **bold**.

### Supplemental Table 3. Gene Ontology (GO) analysis

| Domain <sup>A</sup> | GO ID      | GO Term                                     | Count/<br>List Total | Pop Hits/<br>Pop Total | Fold<br>Enrich-<br>ment | p value  | Bonferroni |
|---------------------|------------|---------------------------------------------|----------------------|------------------------|-------------------------|----------|------------|
| BP                  | GO:0009611 | Response to wounding                        | 63/991               | 318/14977              | 3.0                     | 7.0E-15  | 3.9E-11    |
| BP                  | GO:0006954 | Inflammatory response                       | 48/991               | 227/14977              | 3.2                     | 1.6E-12  | 8.0E-09    |
| BP                  | GO:0048519 | Negative regulation of biological process   | 128/991              | 1029/14977             | 1.9                     | 2.3E-12  | 1.2E-08    |
| MF                  | GO:0030020 | ECM constituent conferring tensile strength | 17/1067              | 29/16377               | 9.0                     | 2.8E-12  | 7.6E-09    |
| BP                  | GO:0048523 | Negative regulation of cellular process     | 120/991              | 963/14977              | 1.9                     | 1.1E-11  | 5.8E-08    |
| BP                  | GO:0048518 | Positive regulation of biological process   | 122/991              | 1024/14977             | 1.8                     | 1.4E-10  | 7.3E-07    |
| BP                  | GO:0048731 | System development                          | 182/991              | 1749/14977             | 1.6                     | 2.1E-10  | 1.1E-06    |
| BP                  | GO:0048513 | Organ development                           | 149/991              | 1416/14977             | 1.6                     | 6.7E-09  | 3.5E-05    |
| BP                  | GO:0008219 | Cell death                                  | 88/991               | 725/14977              | 1.8                     | 3.45E-08 | 1.7E-04    |
| BP                  | GO:0043067 | Regulation of programmed cell death         | 64/991               | 467/14977              | 2.1                     | 4.4E-08  | 2.3E-04    |
| BP                  | GO:0048522 | Positive regulation of cellular process     | 102/991              | 896/14977              | 1.7                     | 6.2E-08  | 3.2E-04    |
| BP                  | GO:0030154 | Cell differentiation                        | 179/991              | 1847/14977             | 1.5                     | 6.7E-08  | 3.5E-04    |
| MF                  | GO:0030247 | Polysaccharide binding                      | 21/1067              | 89/16377               | 3.6                     | 8.3E-07  | 0.0023     |
| BP                  | GO:0006935 | Chemotaxis                                  | 24/991               | 113/14977              | 3.2                     | 1.1E-06  | 0.0056     |
| BP                  | GO:0042330 | Taxis                                       | 24/991               | 113/14977              | 3.2                     | 1.1E-06  | 0.0056     |
| BP                  | GO:0042127 | Cell proliferation                          | 50/991               | 374/14977              | 2.0                     | 3.3E-06  | 0.017      |
| MF                  | GO:0005102 | Receptor binding                            | 76/1067              | 677/16377              | 1.7                     | 3.9E-06  | 0.011      |
| BP                  | GO:0016477 | Cell migration                              | 42/991               | 302/14977              | 2.1                     | 8.6E-06  | 0.044      |

<sup>A</sup>Headings: Domain, BP (Biological Process) and MF (Molecular Function); Count/List Total, number of involved genes in individual GO term/number of differentially expressed genes identified by DSAGE ( $\leq 1,317$  genes); Pop Hits/Pop Total, number of involved genes in individual GO term/number of total genes in mouse genome background ( $\sim 15,000$ - $16,500$ )

genes); Fold Enrichment, ratio of gene enrichment compared to the mouse genome background ( $\geq 1.5$ ); p value, Modified Fisher's Exact p value to reflect significance of gene enrichment in GO terms; Bonferroni, multiple testing correction of p value ( $p < 0.05$ ).

## Supplemental Methods:

*Immunohistochemical detection of pSmad2.* Cardiac tissues were harvested and processed as described in Methods. Sections were subsequently deparaffinized in xylene and rehydrated through ethanol gradient solutions. The sections were washed 5 minutes at RT in immunostain wash buffer (GeneTex Inc., GTX73344) and heat-induced antigen retrieval was performed in citric acid buffer, pH 6.0. The slides were cooled to RT for 20 minutes, rinsed in water for 3 minutes x 5 at RT and blocked with immunostain blocker solution (GeneTex Inc, GTX73323) for 2 minutes at 40°C. The sections were then washed with immunostain wash buffer for 1 minute x 5 at RT and incubated in 1% hydrogen peroxide/water solution for 2 minutes at 40°C. The sections were subsequently washed with immunostain wash buffer 1 minute x 4 at RT, blocked in 1.5% normal goat serum in PBS-0.1%TritonX-100 overnight at 4°C, and incubated with anti-pSmad2 rabbit polyclonal antibodies (Cell Signaling #3101, 1:100 dilution in PBS) for 30 minutes at 40°C. After washing the sections for 1 minute x 5, the sections were incubated with biotinylated anti-rabbit antibodies (VectaStain Elite Kit, 1:200 dilution in PBS) for 20 minutes at 40°C and incubated with ABC reagent for 10 minutes at 40°C. The slides was incubated with AEC chromogen (BD Elispot, #551951) for 10 minutes at 40°C, counterstained with hematoxylin and mounted with Aqua/Poly mount (Polysciences Inc., #18606).

## Supplemental References

1. Horiuchi, K., Amizuka, N., Takeshita, S., Takamatsu, H., Katsuura, M., Ozawa, H., Toyama, Y., Bonewald, L.F., and Kudo, A. 1999. Identification and characterization of a novel protein, periostin, with restricted expression to periosteum and periodontal ligament and increased expression by transforming growth factor beta. *J Bone Miner Res* 14:1239-1249.

2. Kuang, P.P., Zhang, X.H., Rich, C.B., Foster, J.A., Subramanian, M., and Goldstein, R.H. 2007. Activation of elastin transcription by transforming growth factor-beta in human lung fibroblasts. *Am J Physiol Lung Cell Mol Physiol* 292:L944-952.
3. Kahari, V.M., Olsen, D.R., Rhudy, R.W., Carrillo, P., Chen, Y.Q., and Uitto, J. 1992. Transforming growth factor-beta up-regulates elastin gene expression in human skin fibroblasts. Evidence for post-transcriptional modulation. *Lab Invest* 66:580-588.
4. Ramesh, S., Qi, X.J., Wildey, G.M., Robinson, J., Molkentin, J., Letterio, J., and Howe, P.H. 2008. TGF beta-mediated BIM expression and apoptosis are regulated through SMAD3-dependent expression of the MAPK phosphatase MKP2. *EMBO Rep* 9:990-997.
5. Bujak, M., Ren, G., Kweon, H.J., Dobaczewski, M., Reddy, A., Taffet, G., Wang, X.F., and Frangogiannis, N.G. 2007. Essential role of Smad3 in infarct healing and in the pathogenesis of cardiac remodeling. *Circulation* 116:2127-2138.
6. Verrecchia, F., Chu, M.L., and Mauviel, A. 2001. Identification of novel TGF-beta /Smad gene targets in dermal fibroblasts using a combined cDNA microarray/promoter transactivation approach. *J Biol Chem* 276:17058-17062.
7. Jinnin, M., Ihn, H., Asano, Y., Yamane, K., Trojanowska, M., and Tamaki, K. 2004. Tenascin-C upregulation by transforming growth factor-beta in human dermal fibroblasts involves Smad3, Sp1, and Ets1. *Oncogene* 23:1656-1667.
8. Ahmed, W., Kucich, U., Abrams, W., Bashir, M., Rosenbloom, J., Segade, F., Mecham, R., and Rosenbloom, J. 1998. Signaling pathway by which TGF-beta1 increases expression of latent TGF-beta binding protein-2 at the transcriptional level. *Connect Tissue Res* 37:263-276.
9. Shan, B., Yao, T.P., Nguyen, H.T., Zhuo, Y., Levy, D.R., Klingsberg, R.C., Tao, H., Palmer, M.L., Holder, K.N., and Lasky, J.A. 2008. Requirement of HDAC6 for transforming growth factor-beta1-induced epithelial-mesenchymal transition. *J Biol Chem* 283:21065-21073.
